# Supplementary material for: Modulating Crossover Frequency and Interference for Obligate Crossovers in Saccharomyces cerevisiae Meiosis
Source: PubMed Central journal article supplement (PMC5427503; doi:10.1534/g3.117.040071), 2017-03-17
Supplement: 1511FigureS9.pdf [file 1511FigureS9.pdf]

**mlh3-15A**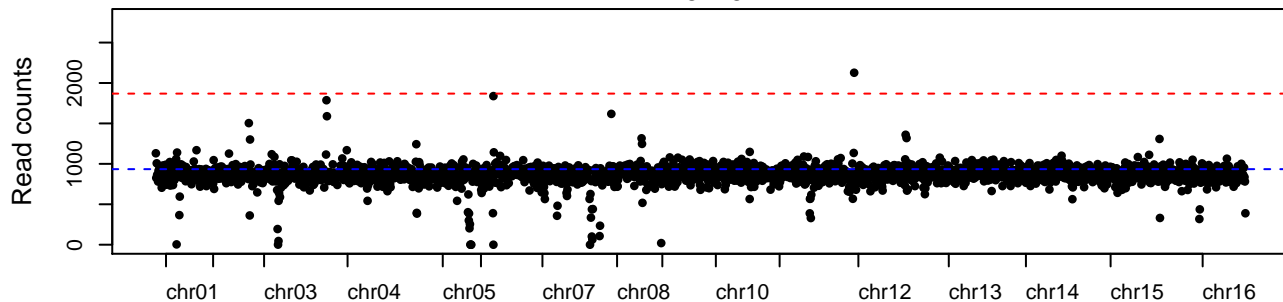**mlh3-15B**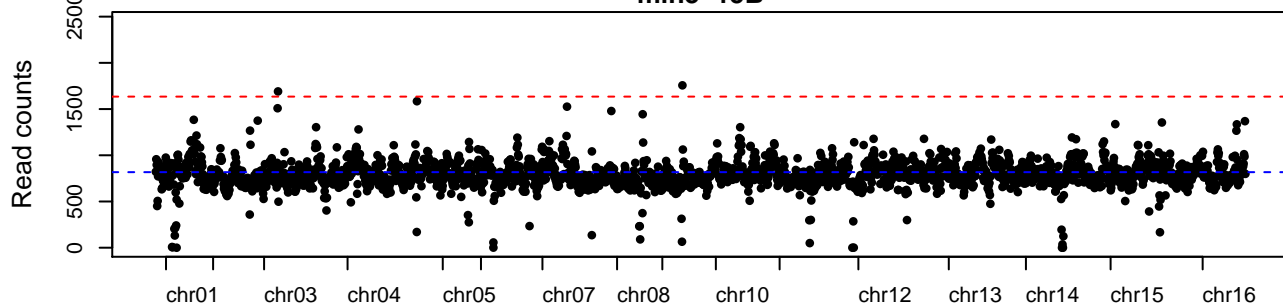**mlh3-15C**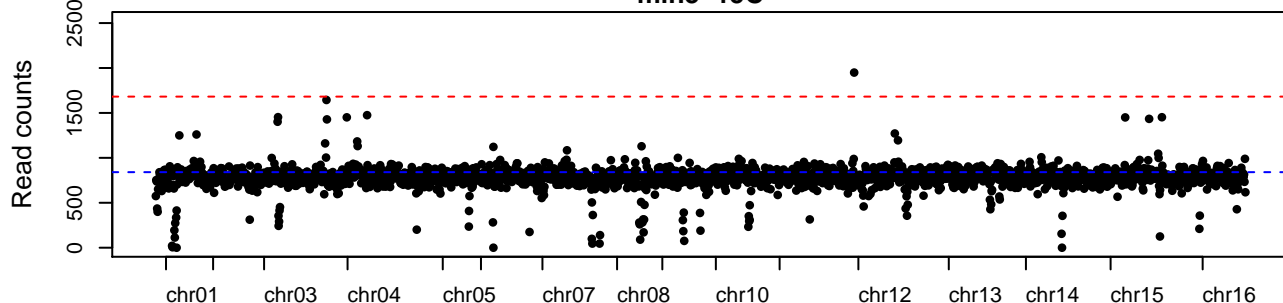**mlh3-15D**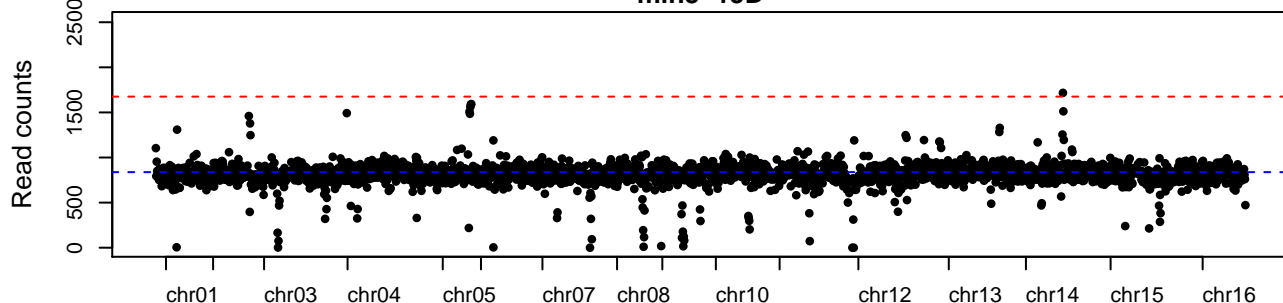

**mlh3-16A**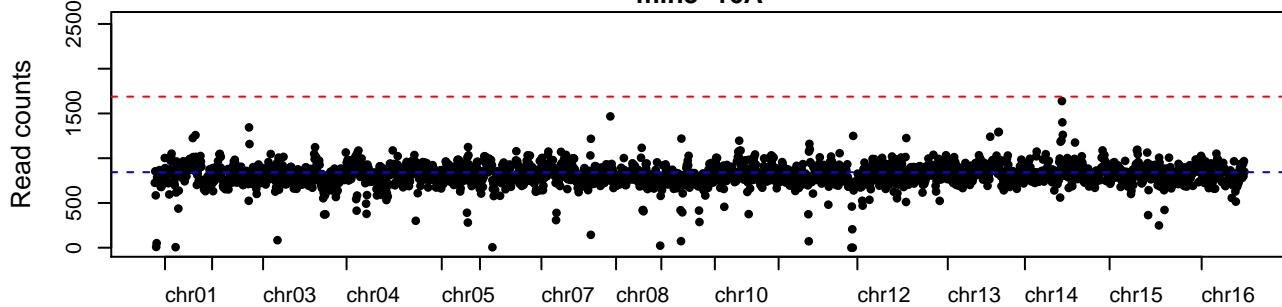**mlh3-16B**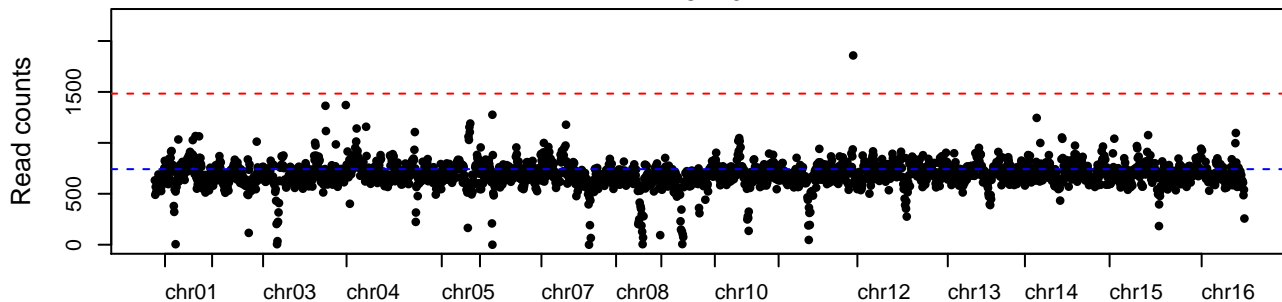**mlh3-16C**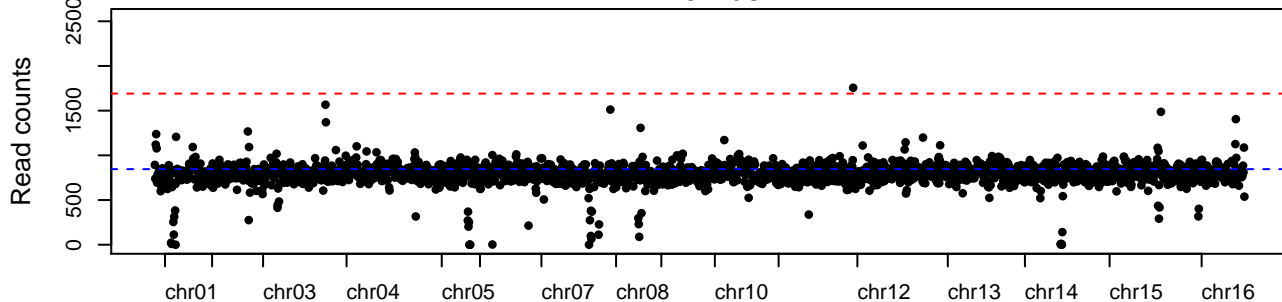**mlh3-16D**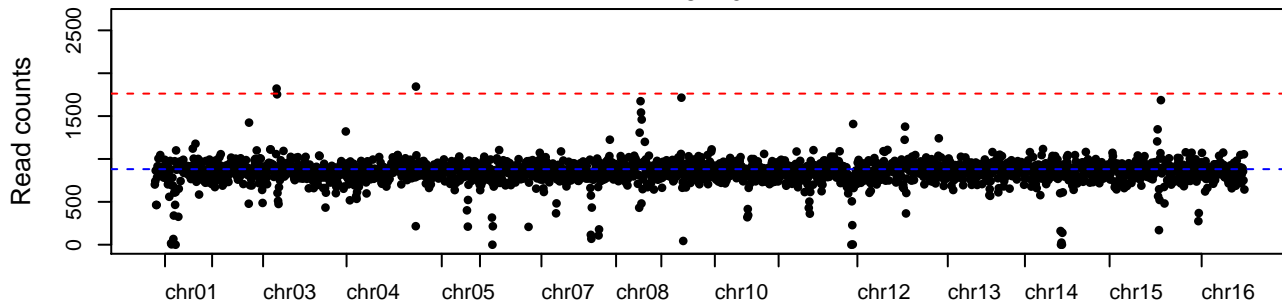

**mlh3-17A**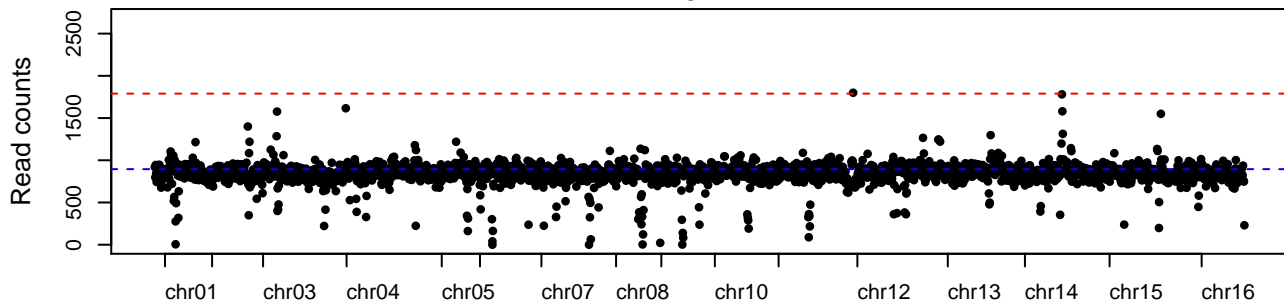**mlh3-17B**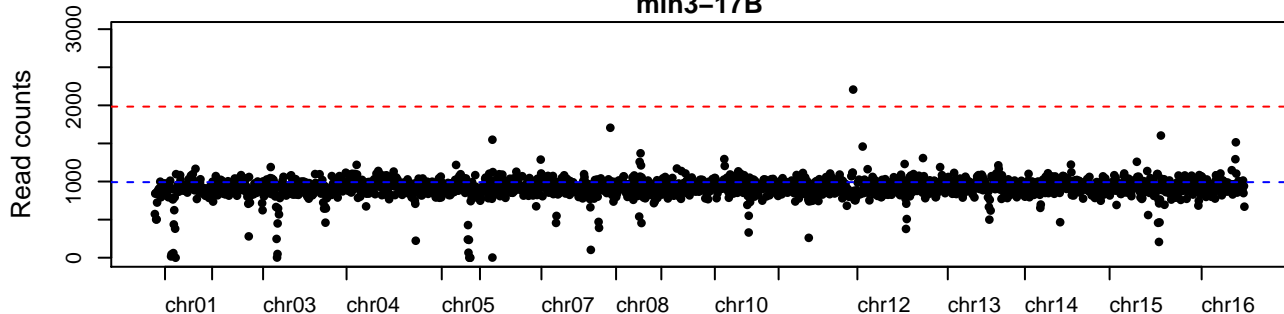**mlh3-17C**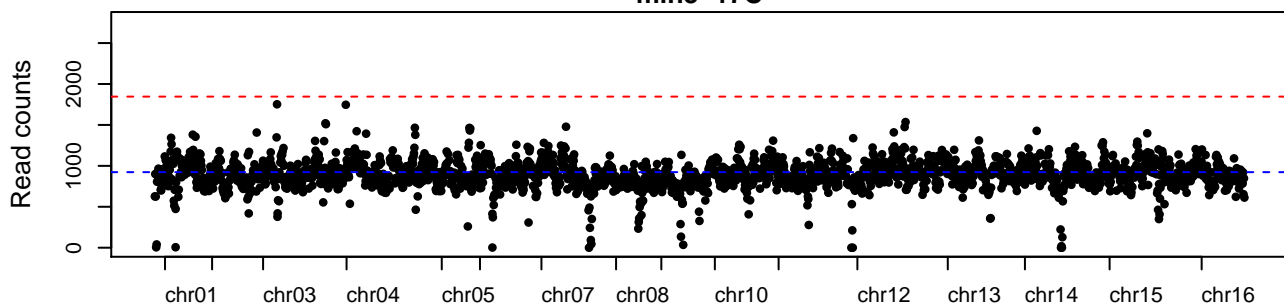**mlh3-17D**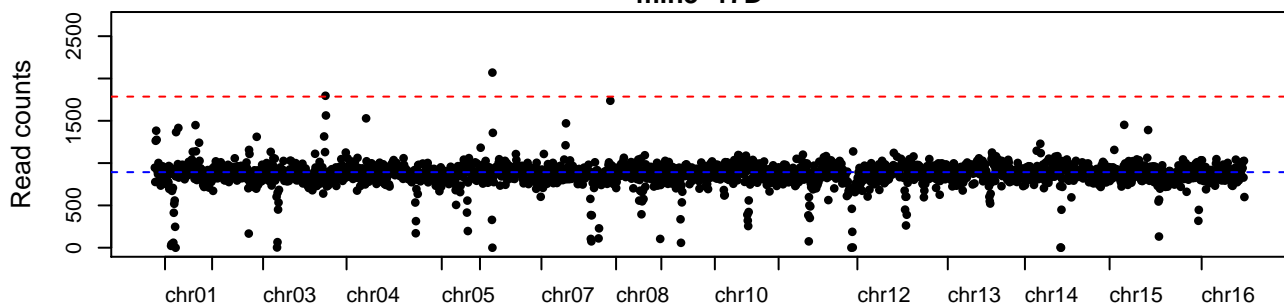

**mlh3-18A**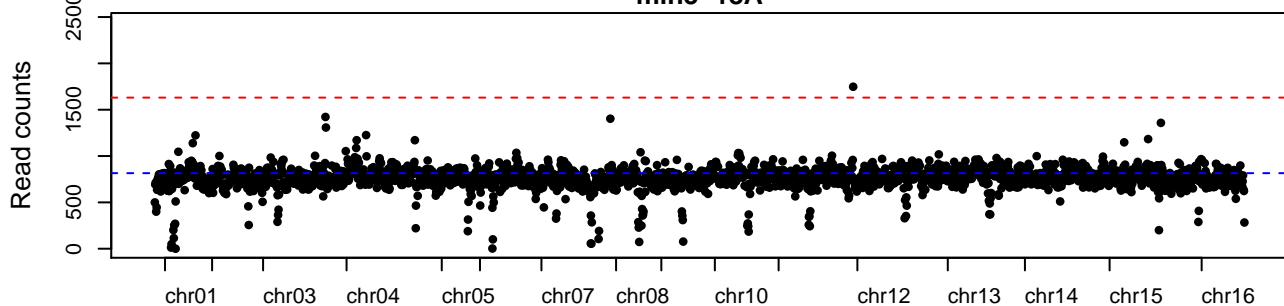**mlh3-18B**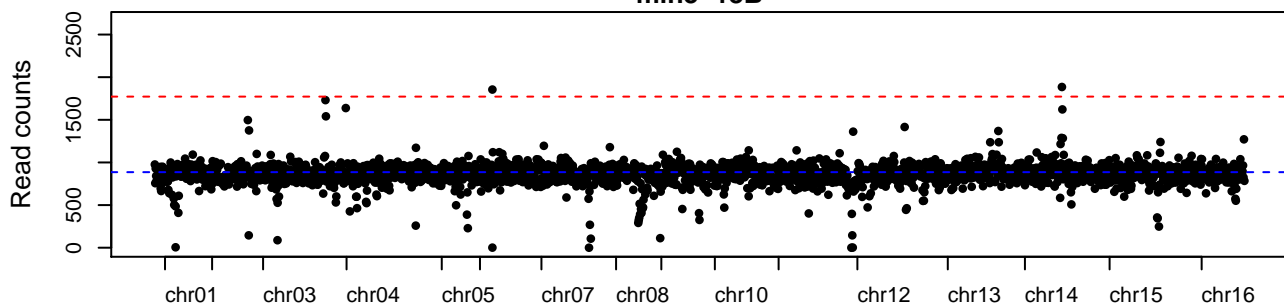**mlh3-18C**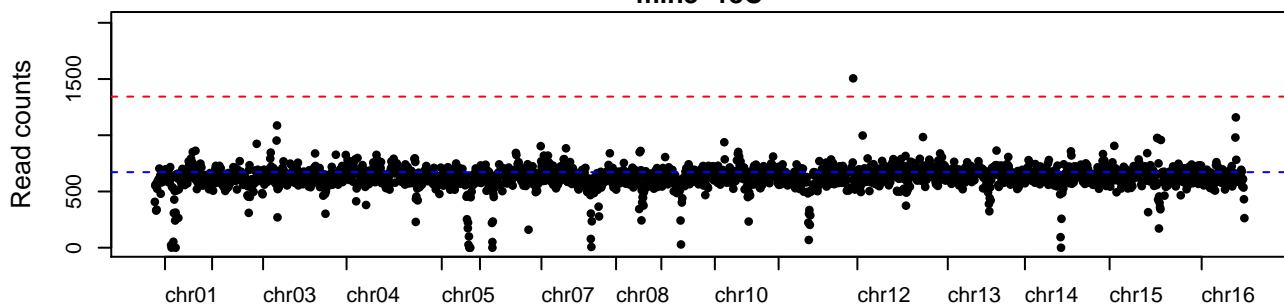**mlh3-18D**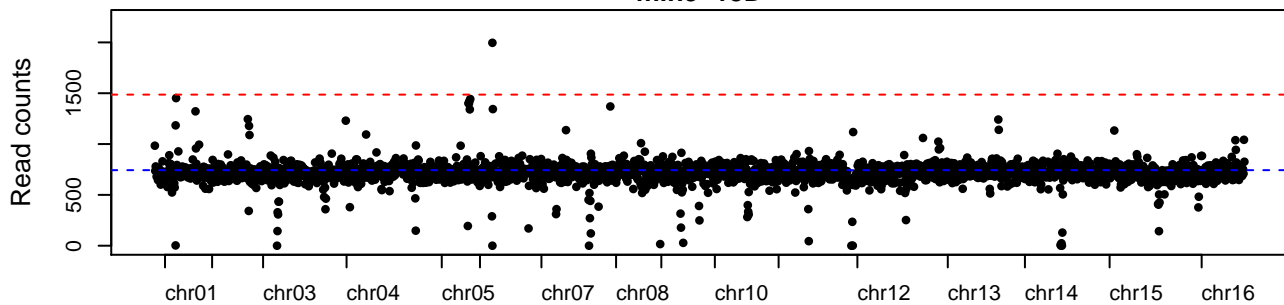

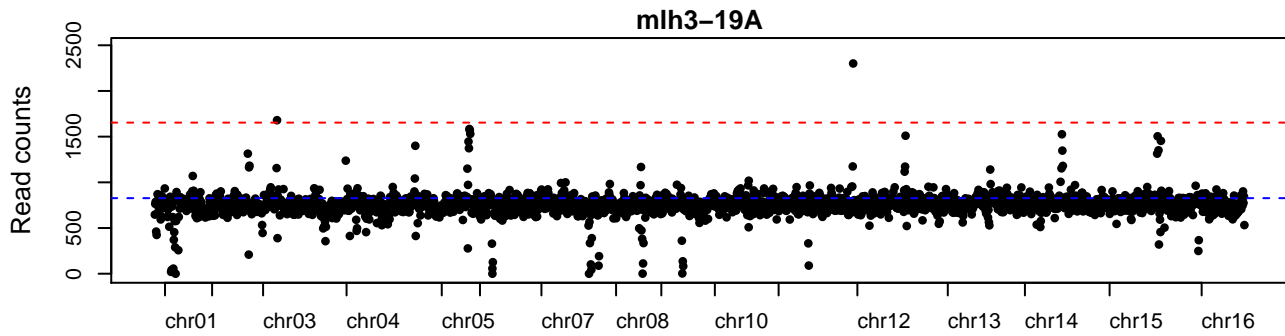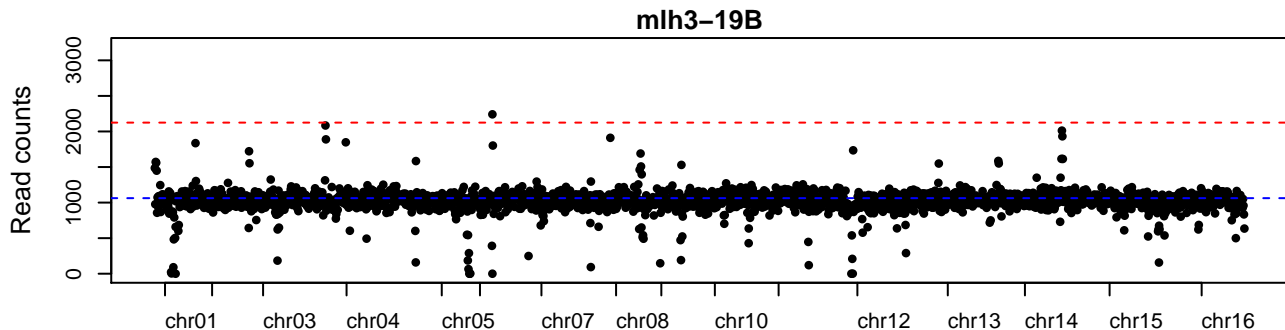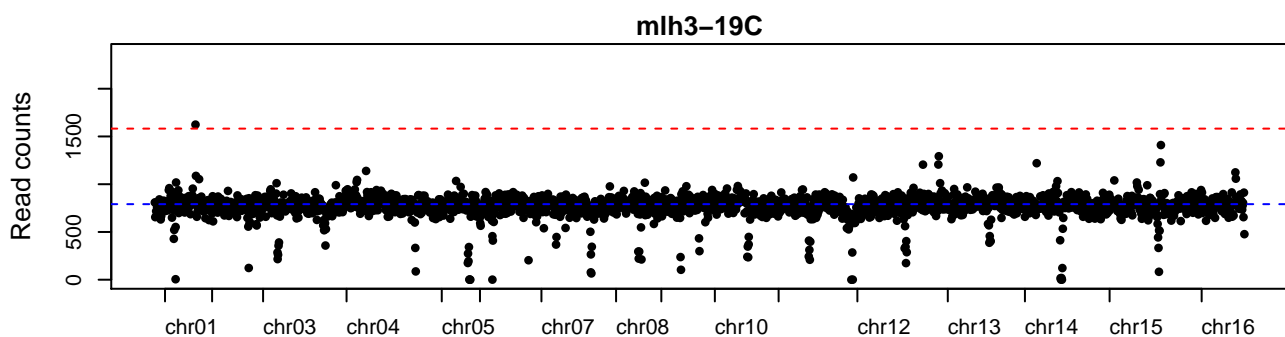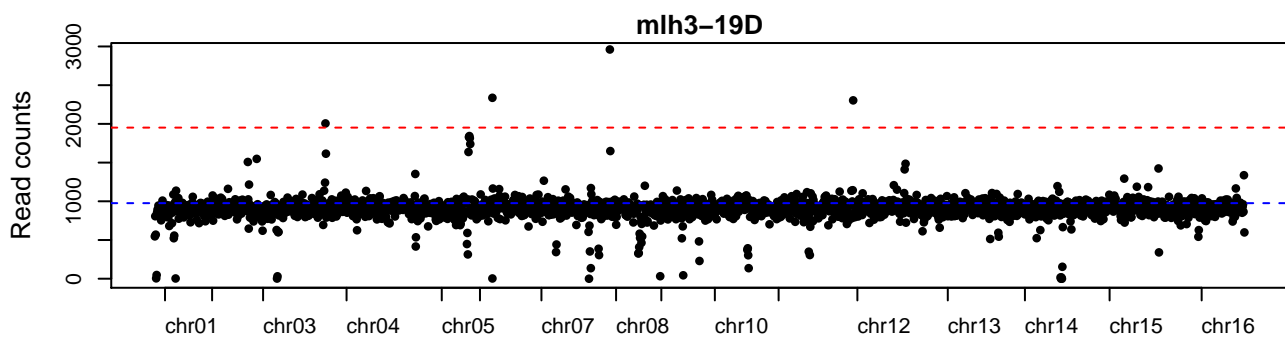

**mlh3-20A**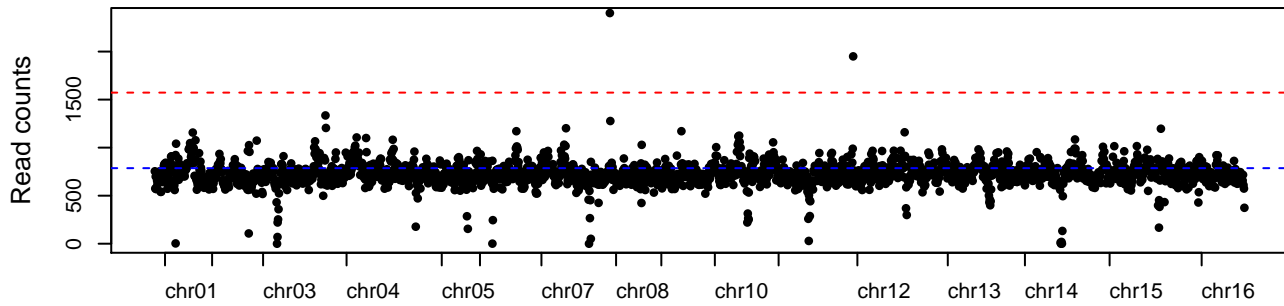**mlh3-20B**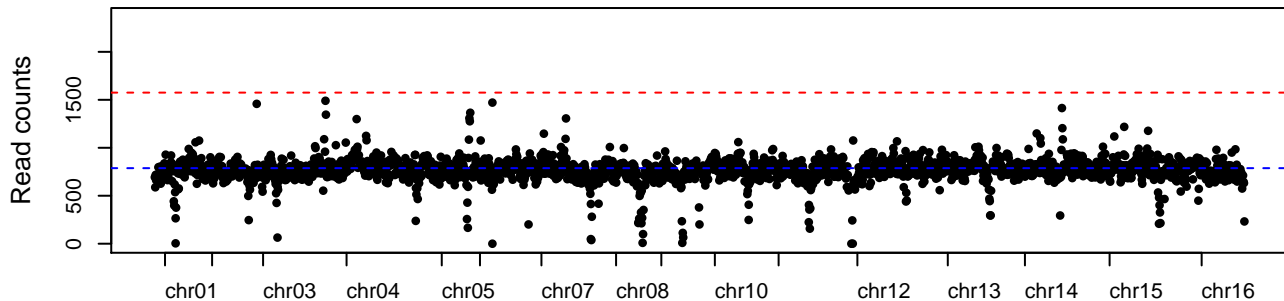**mlh3-20C**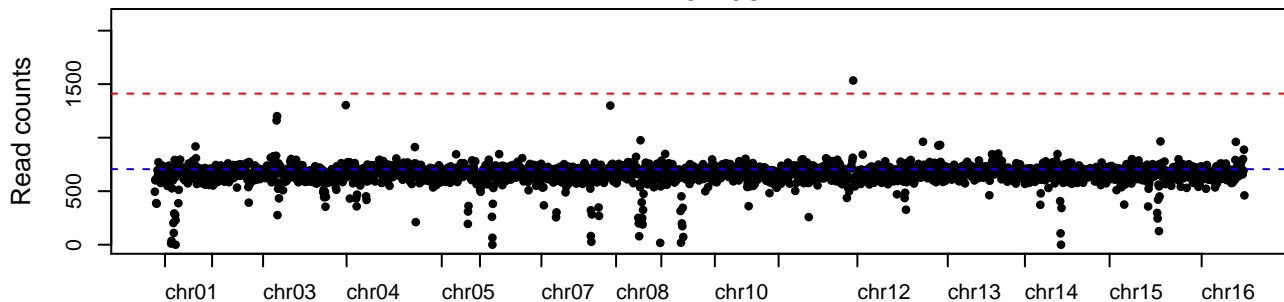**mlh3-20D**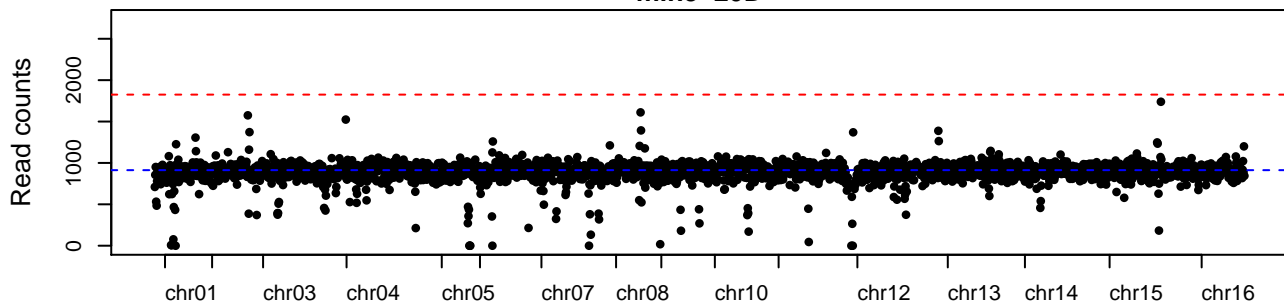

**mlh3-21A**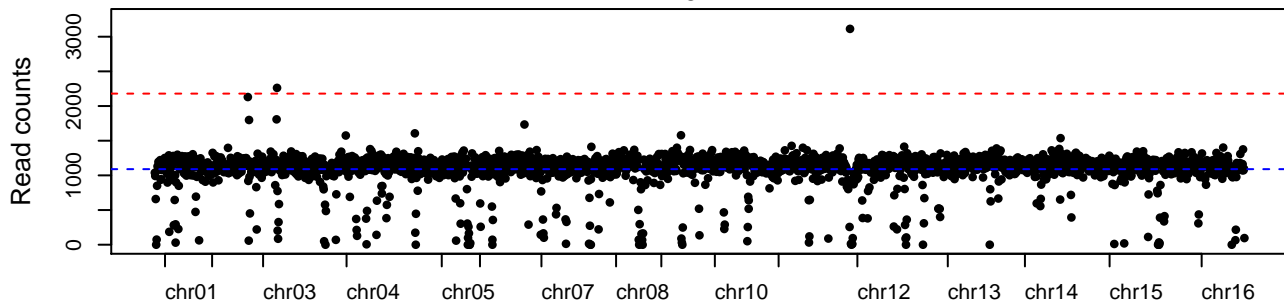**mlh3-21B**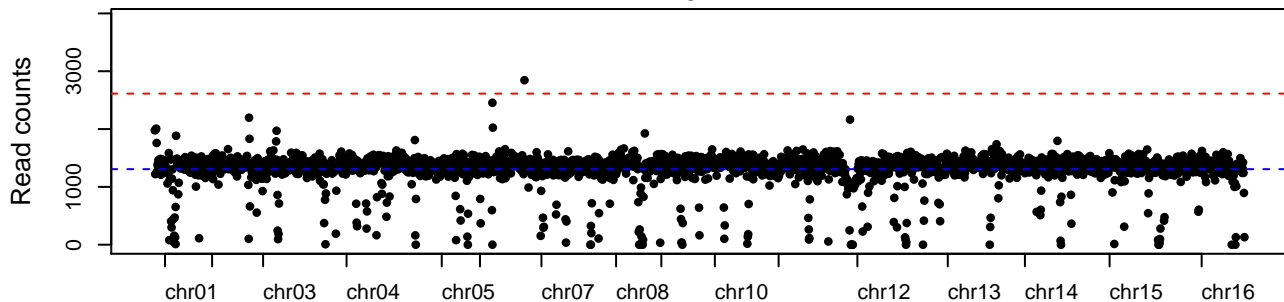**mlh3-21C**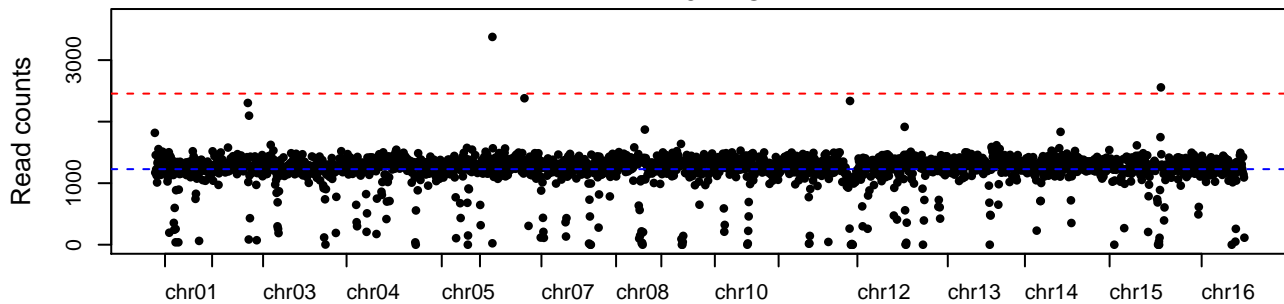**mlh3-21D**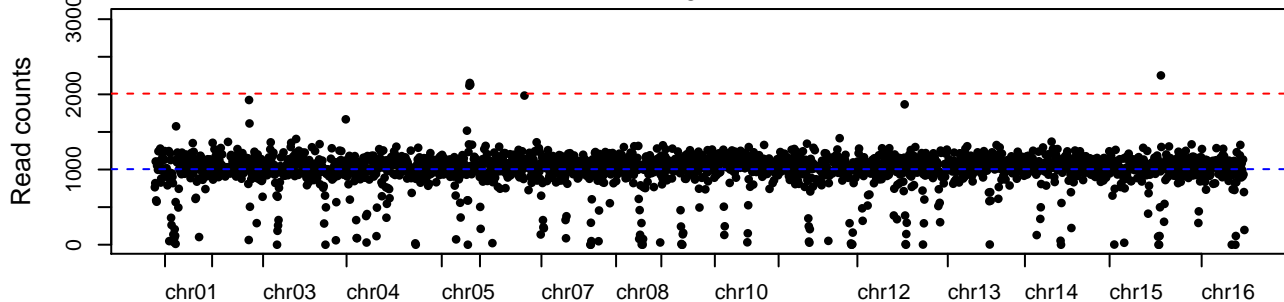

**mlh3-22A**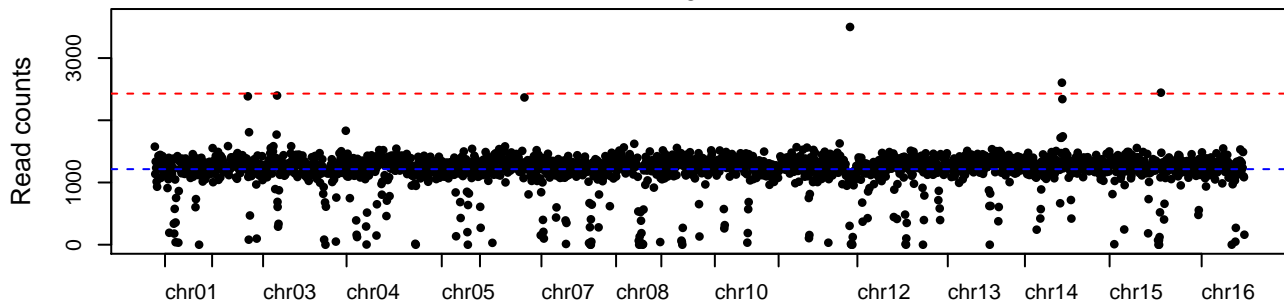**mlh3-22B**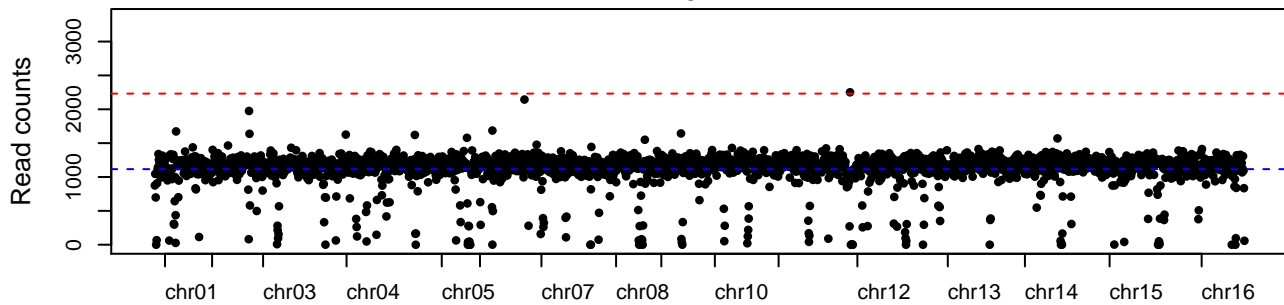**mlh3-22C**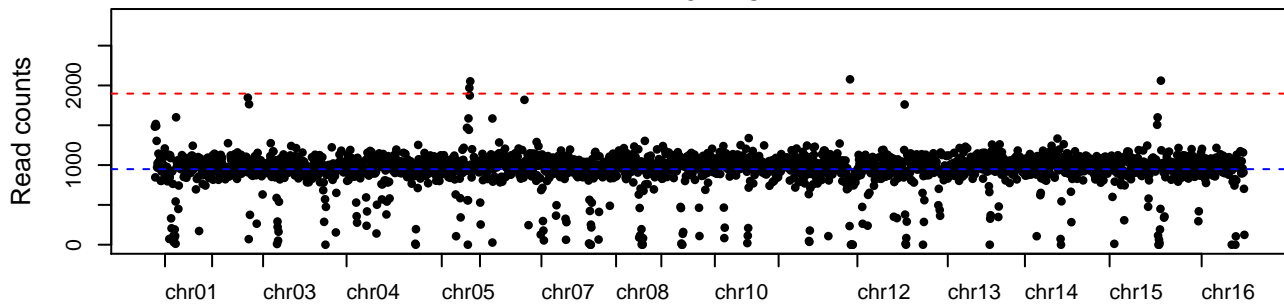**mlh3-22D**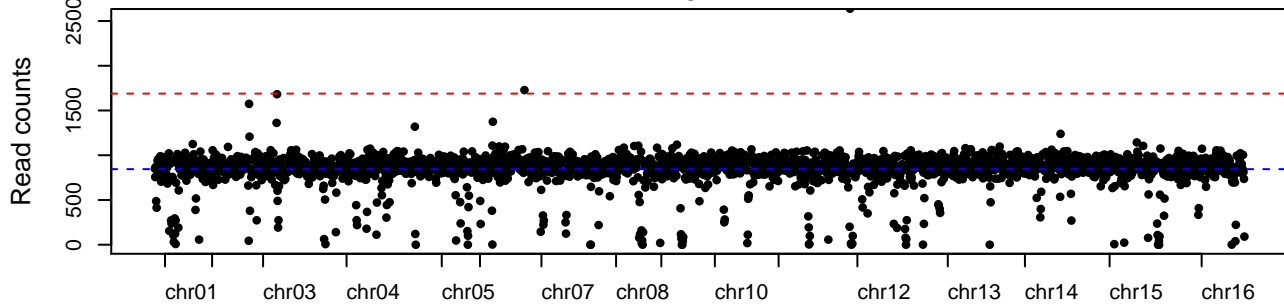



**mlh3-23A**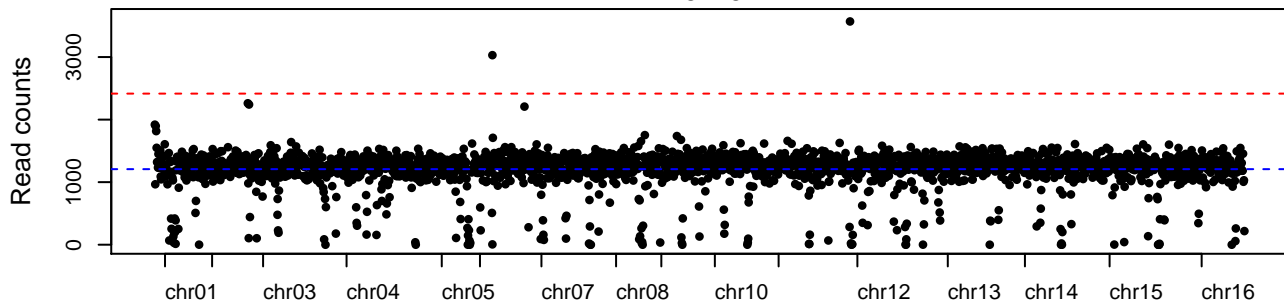**mlh3-23B**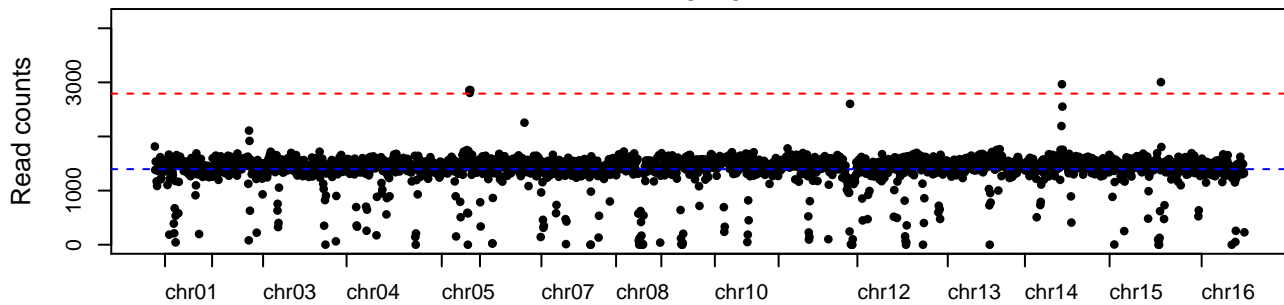**mlh3-23C**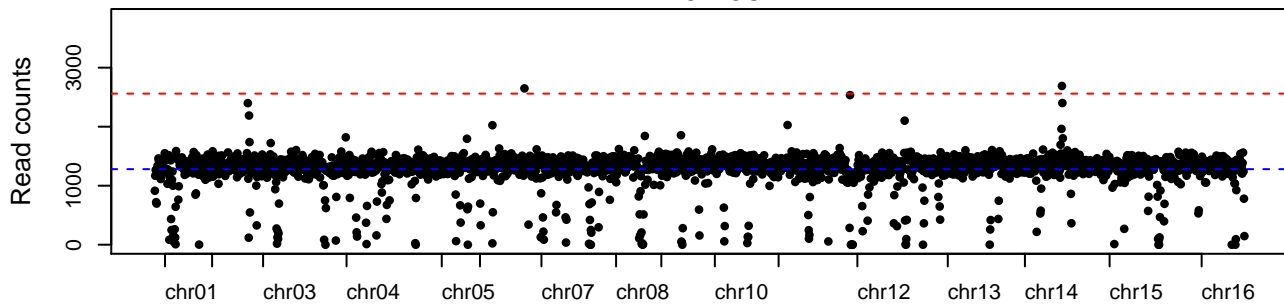**mlh3-23D**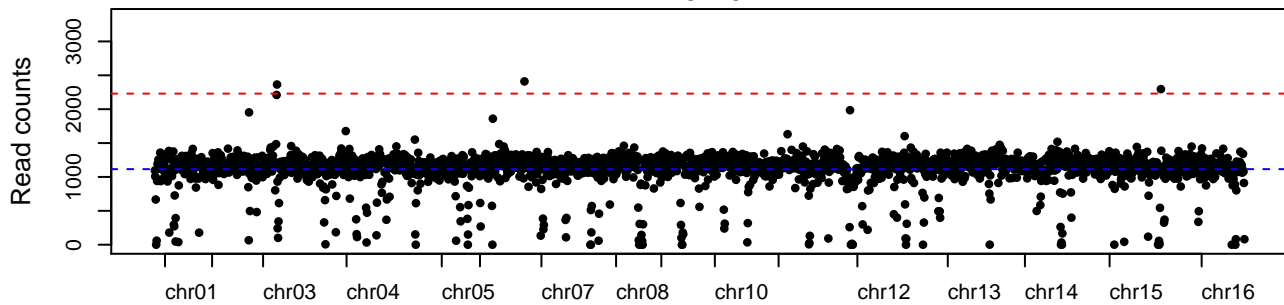

**mlh3-24A**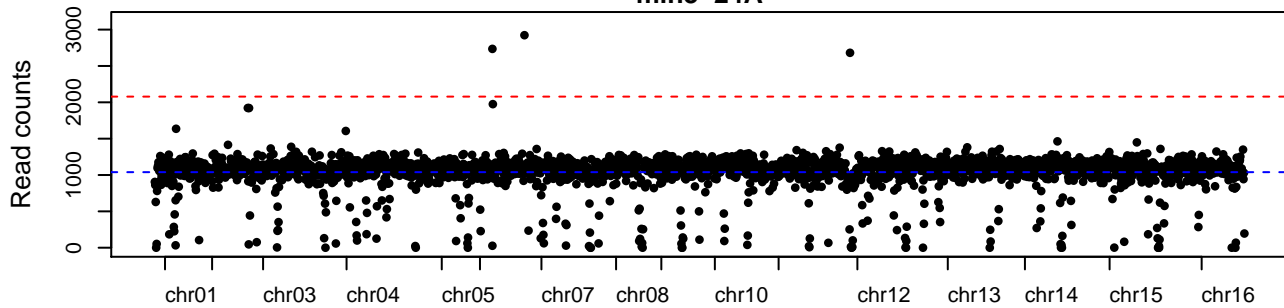**mlh3-24B**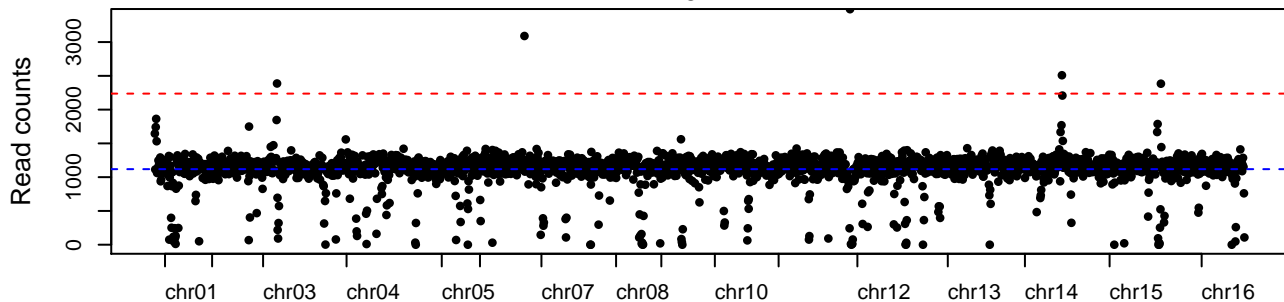**mlh3-24C**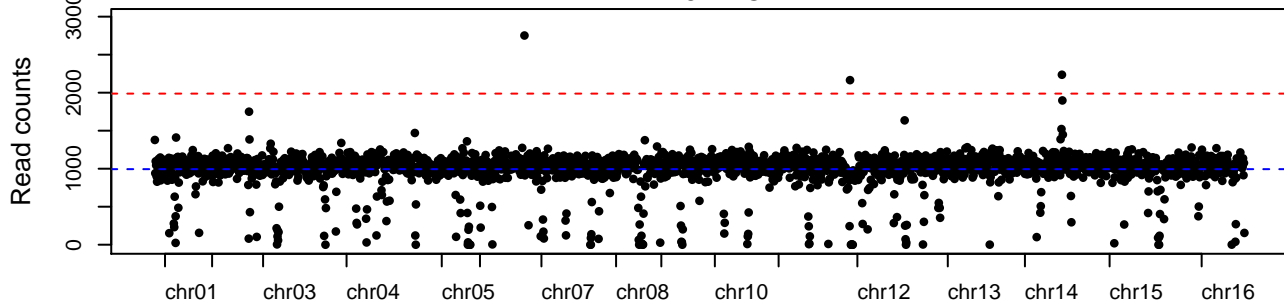**mlh3-24D**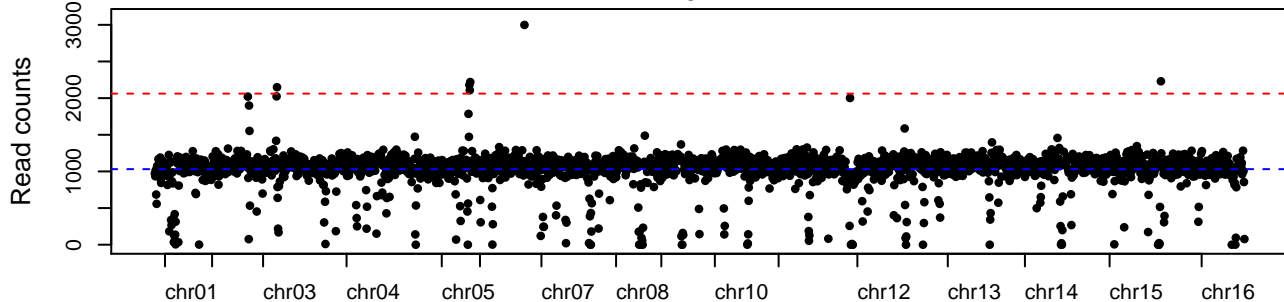

**mlh3-25A**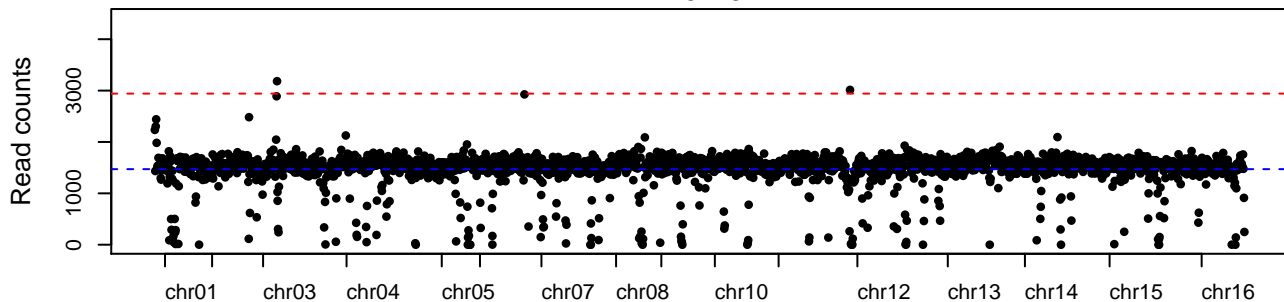**mlh3-25B**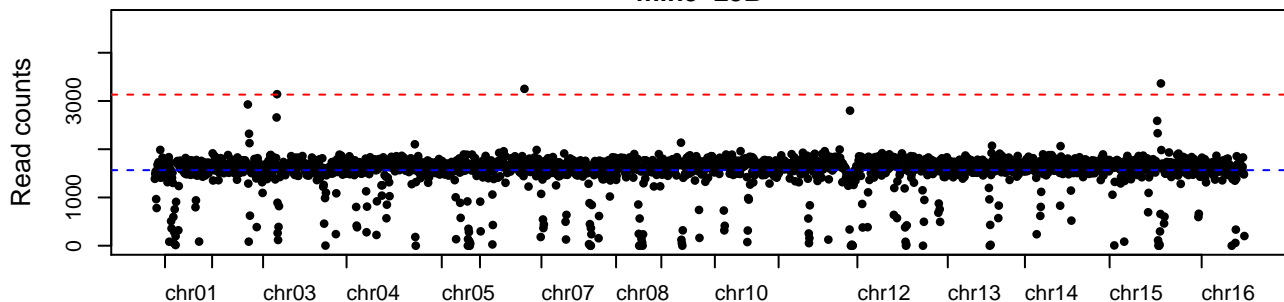**mlh3-25C**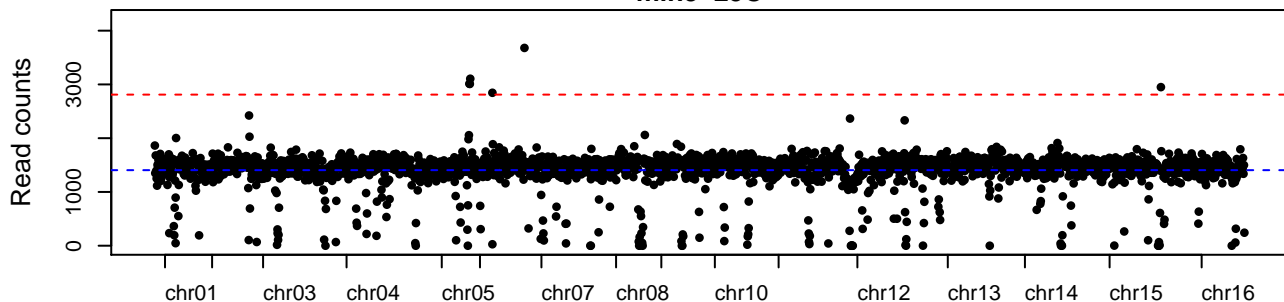**mlh3-25D**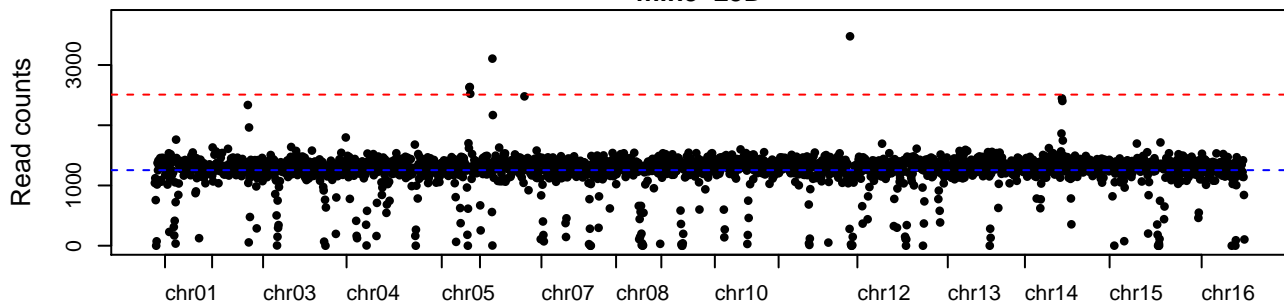

**mlh3-26A**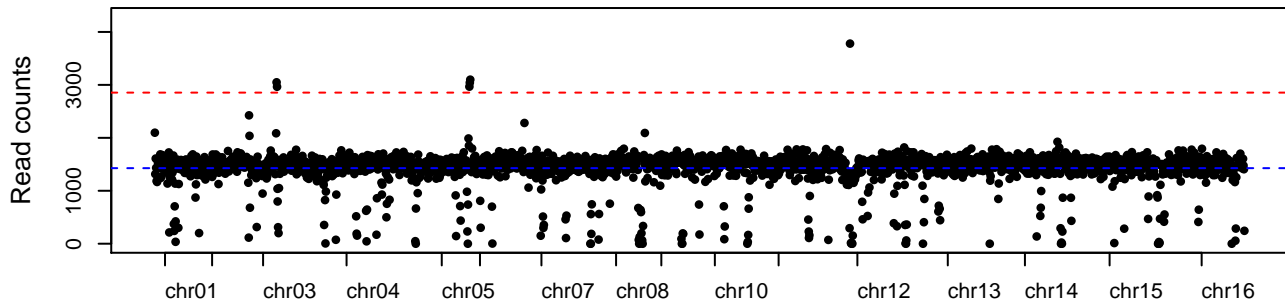**mlh3-26B**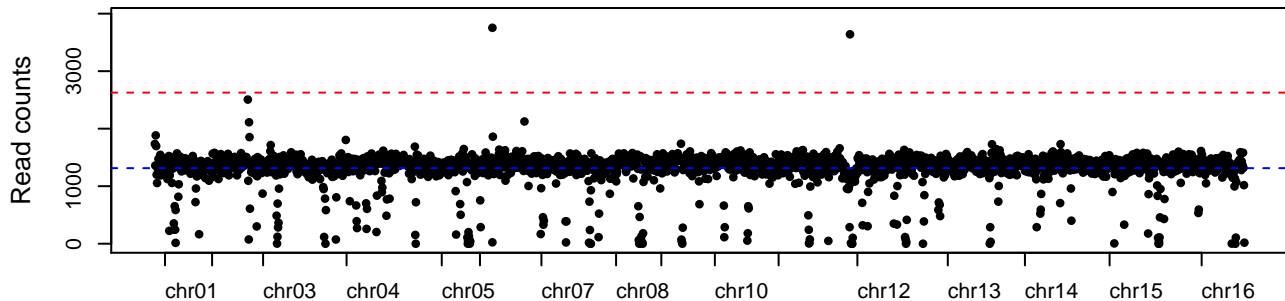**mlh3-26C**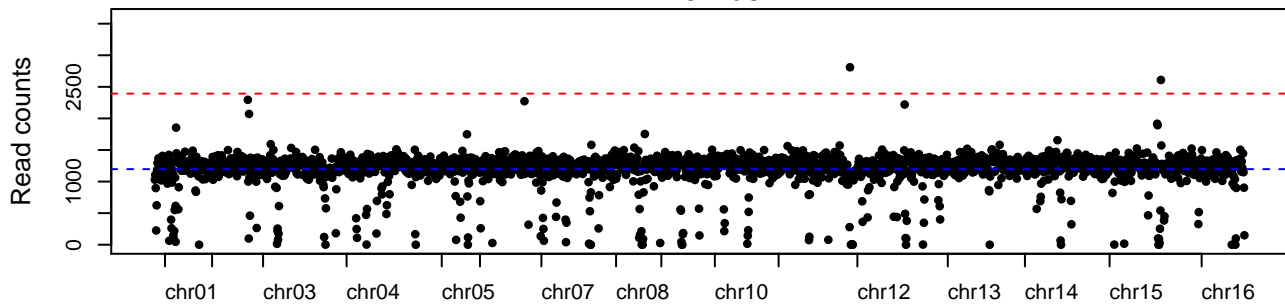**mlh3-26D**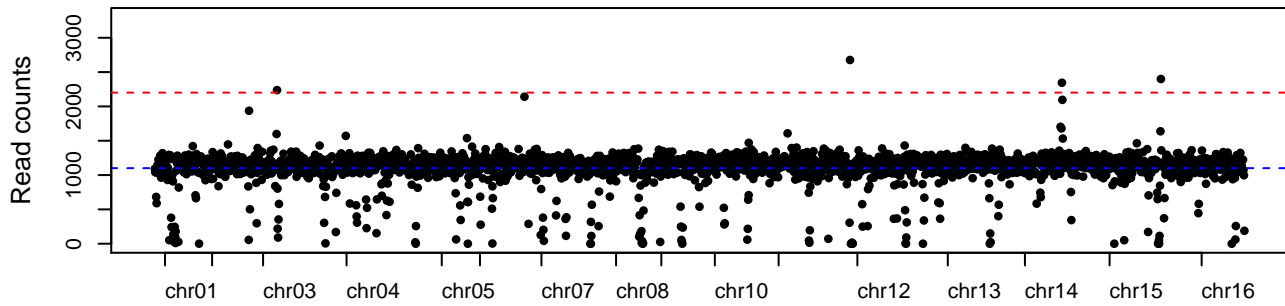

**mlh3-29A**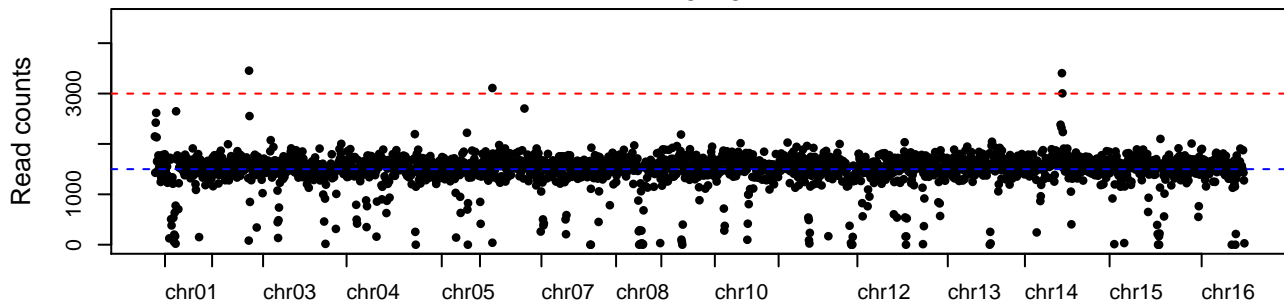**mlh3-29B**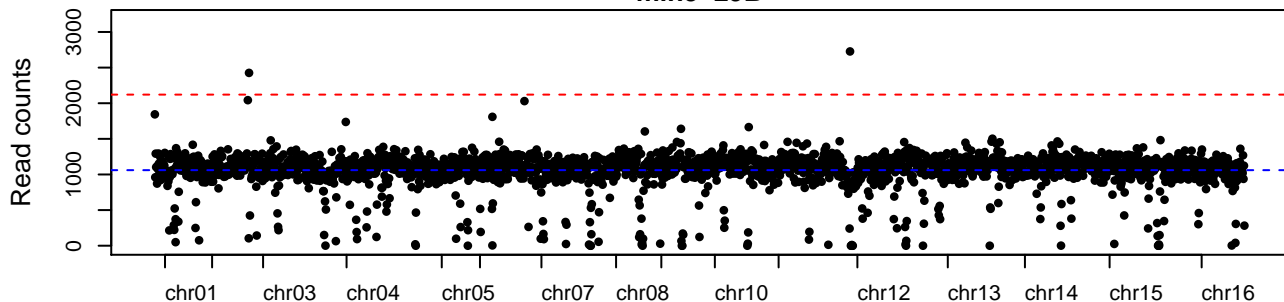**mlh3-29C**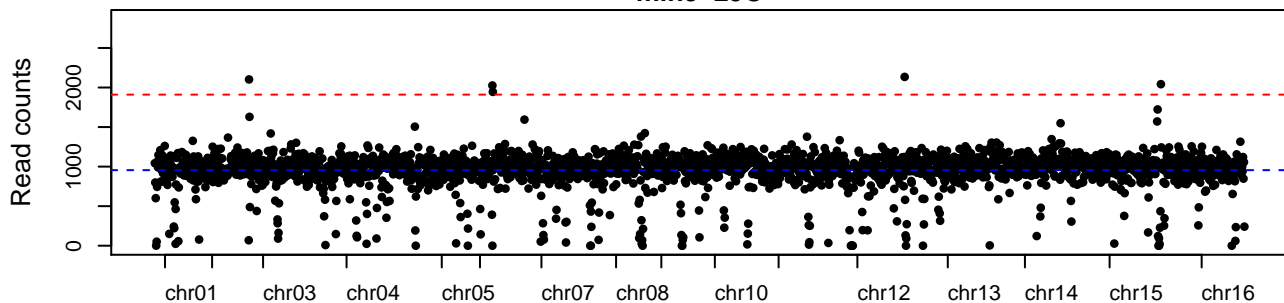**mlh3-29D**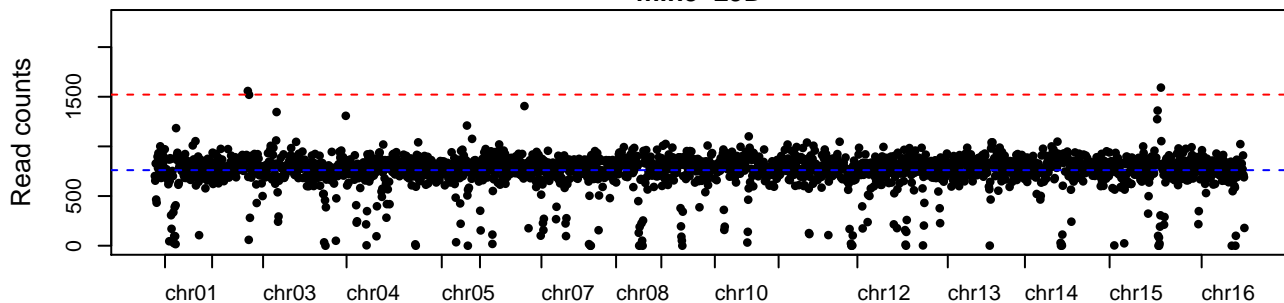

**mlh3-30A**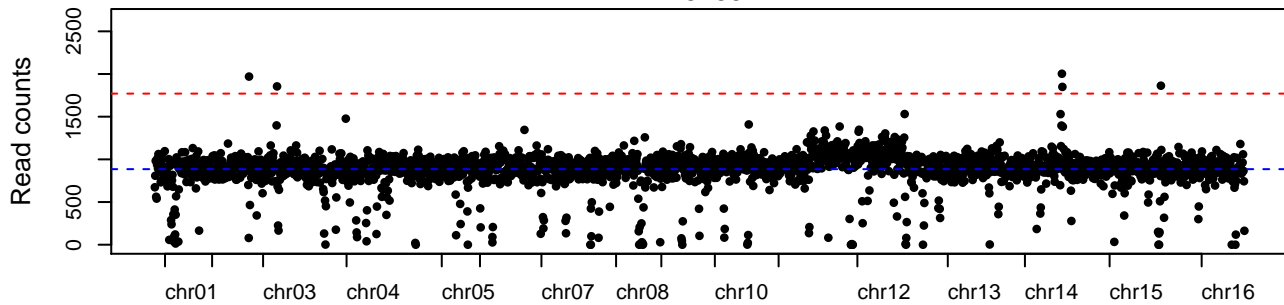**mlh3-30B**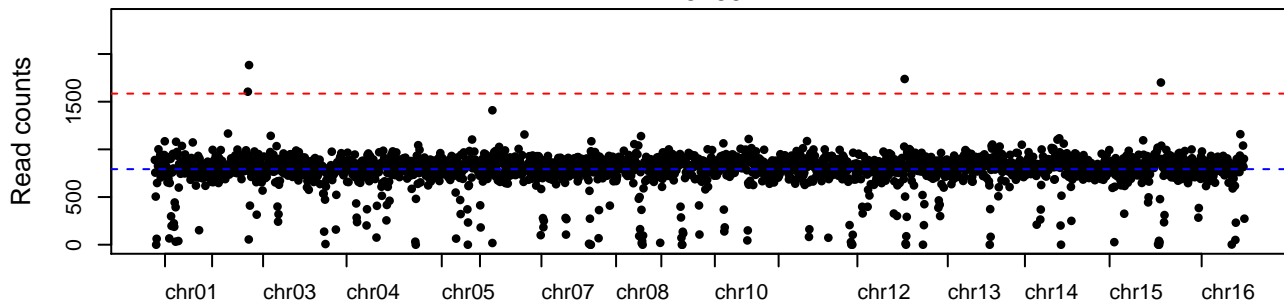**mlh3-30C**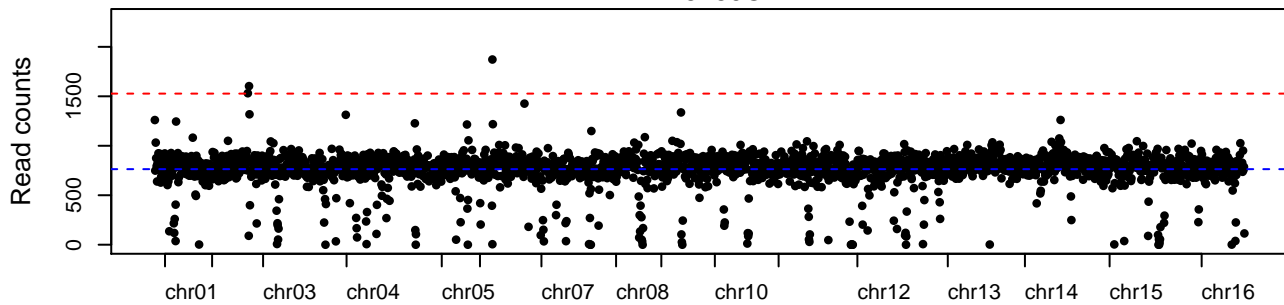**mlh3-30D**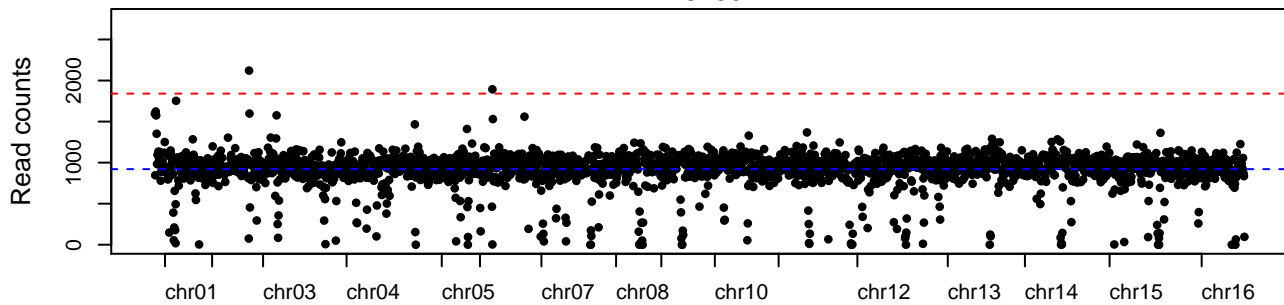

**mlh3-31A**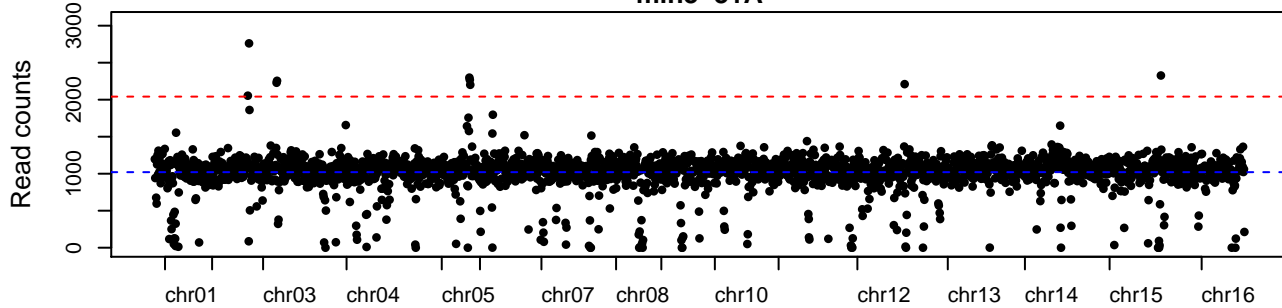**mlh3-31B**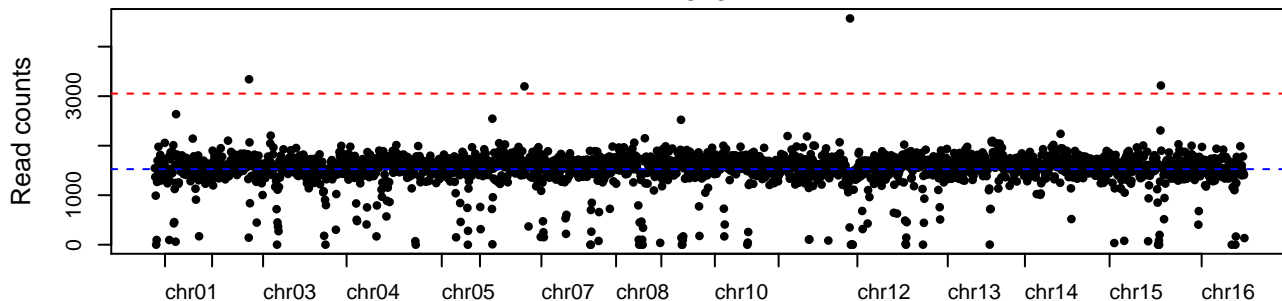**mlh3-31C**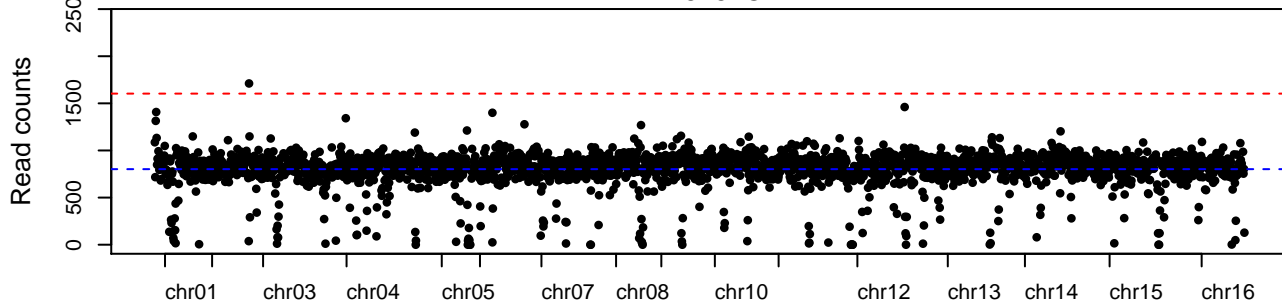**mlh3-31D**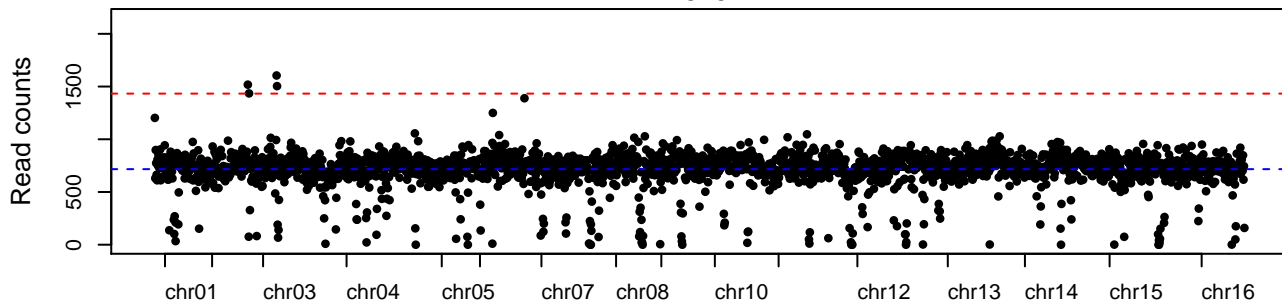

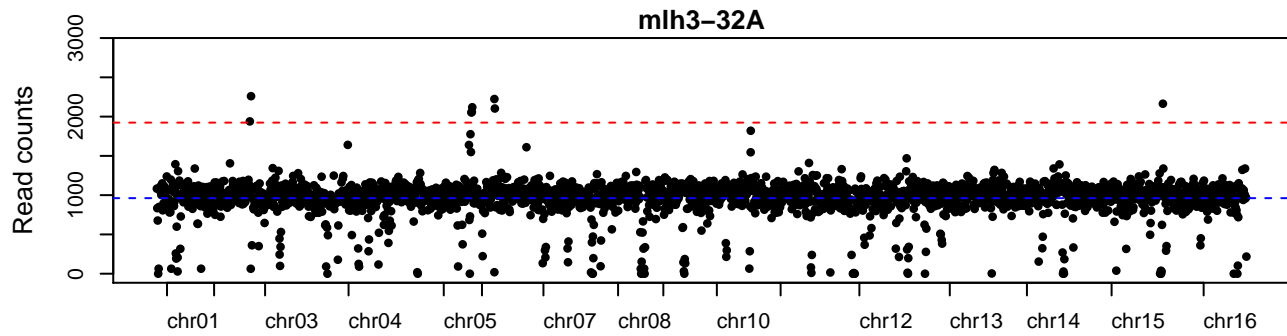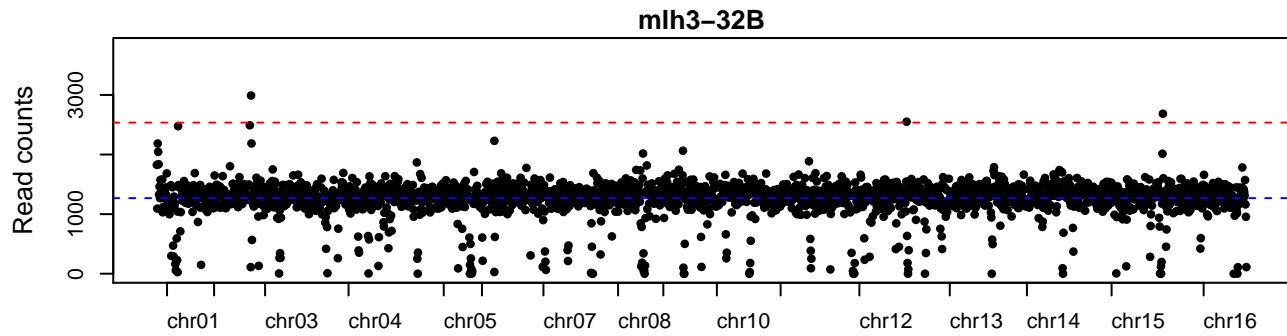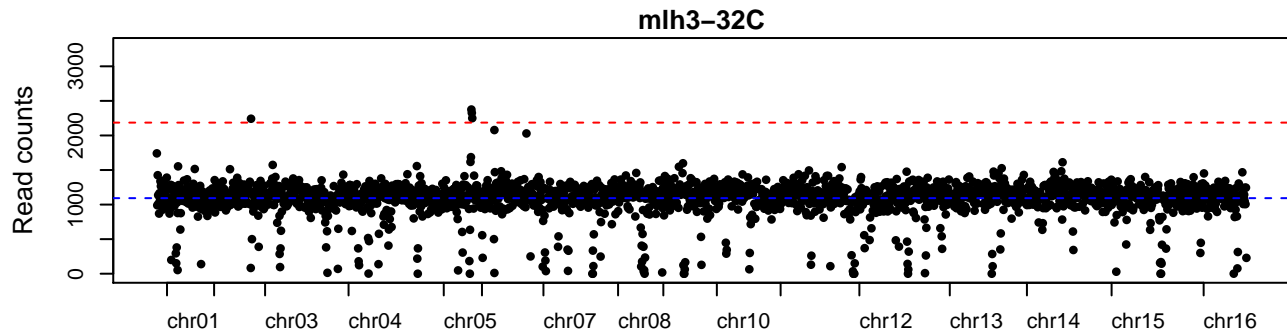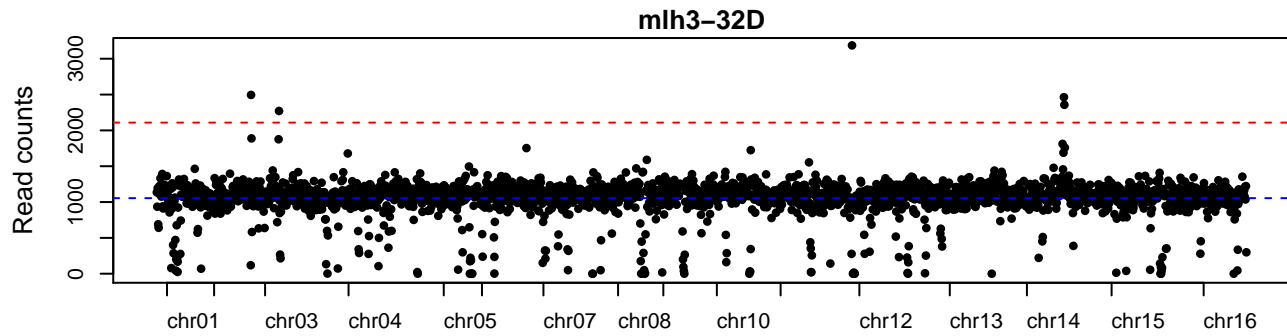



**mlh3-33A**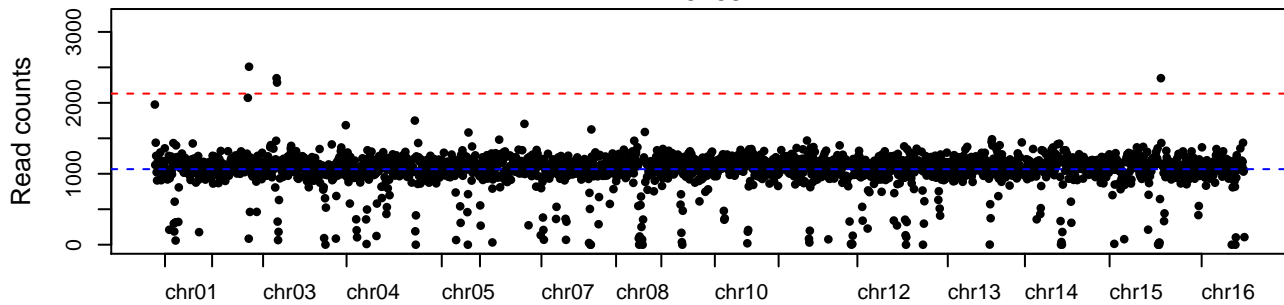**mlh3-33B**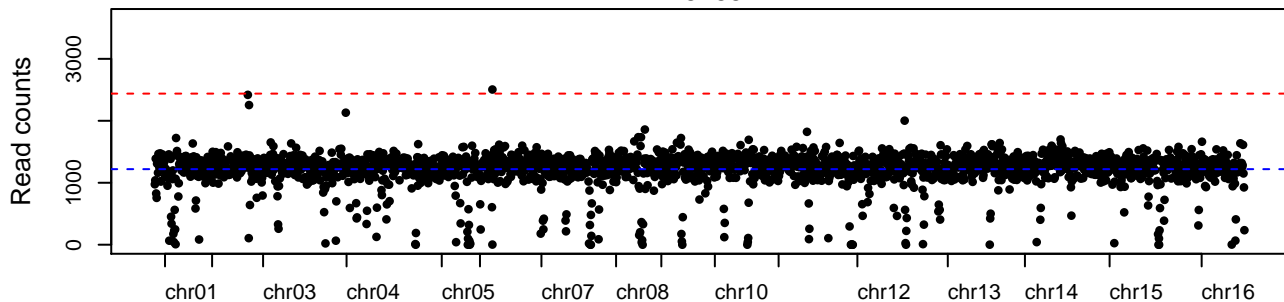**mlh3-33C**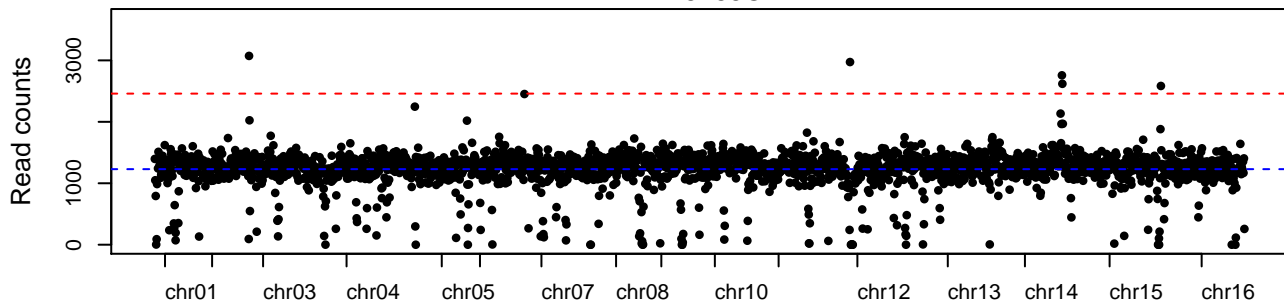**mlh3-33D**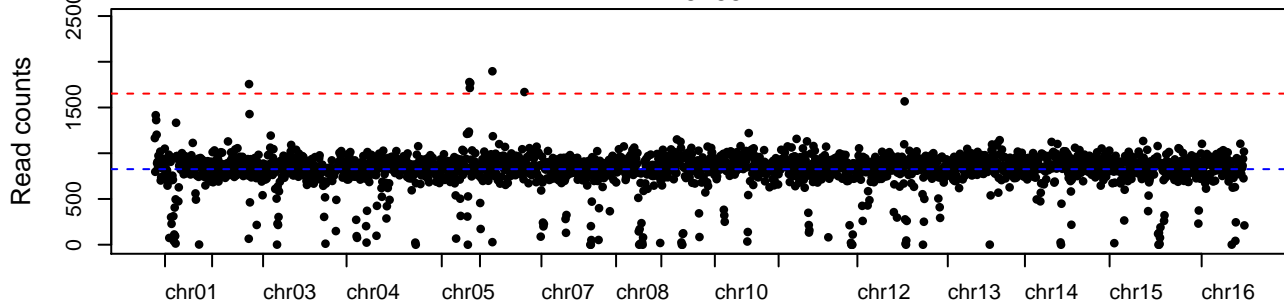

**mlh3-34A**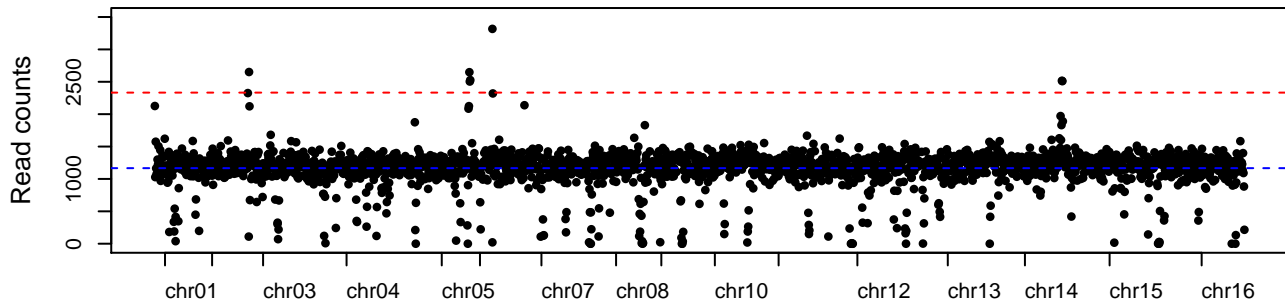**mlh3-34B**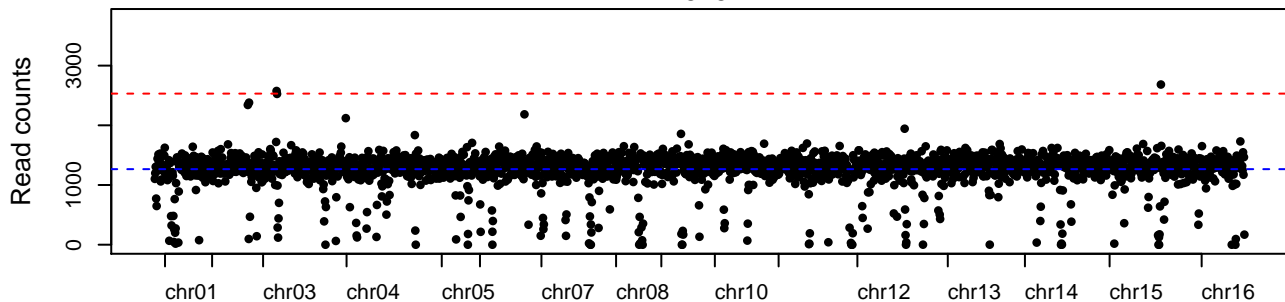**mlh3-34C**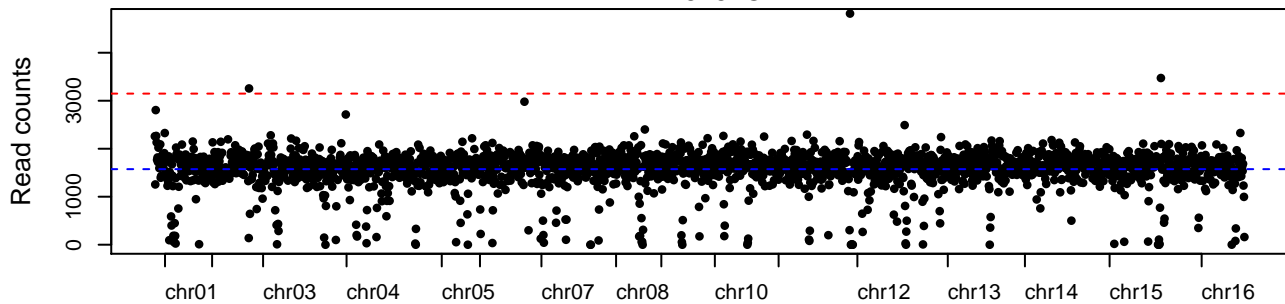**mlh3-34D**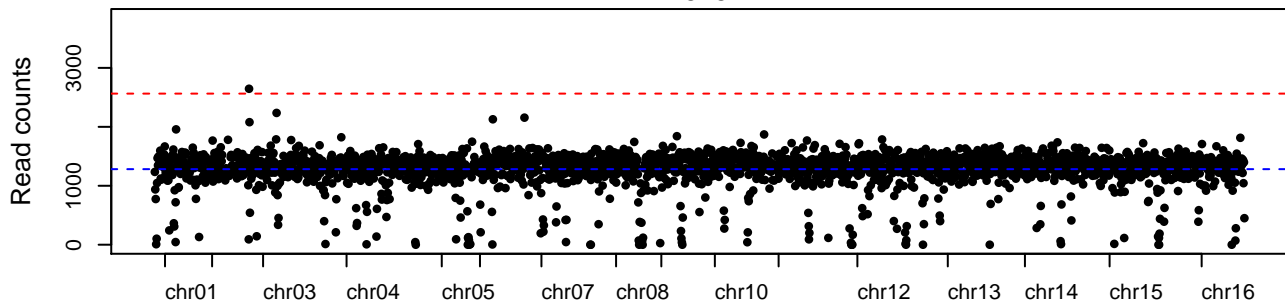

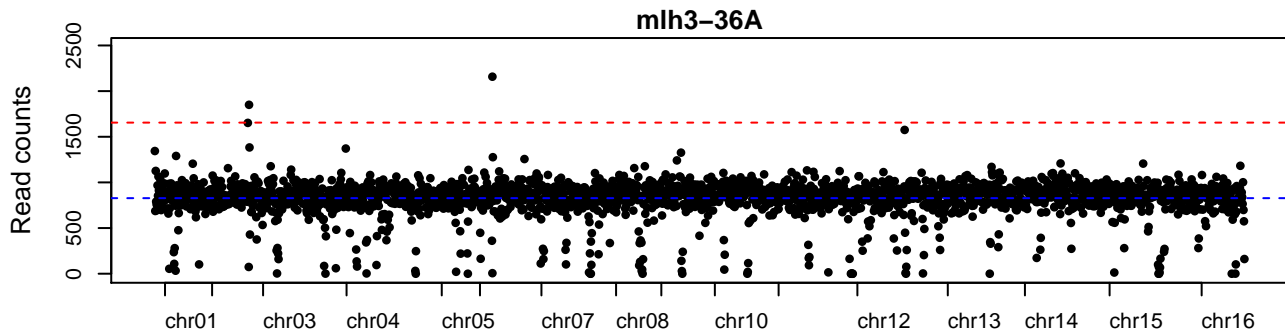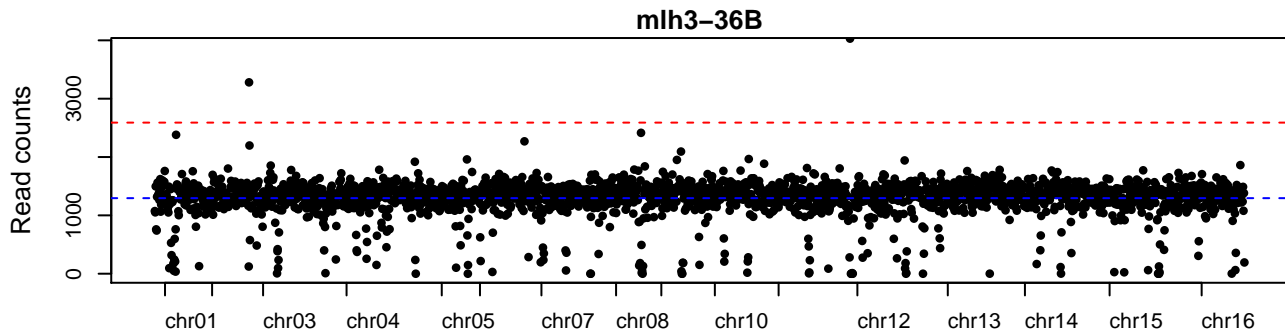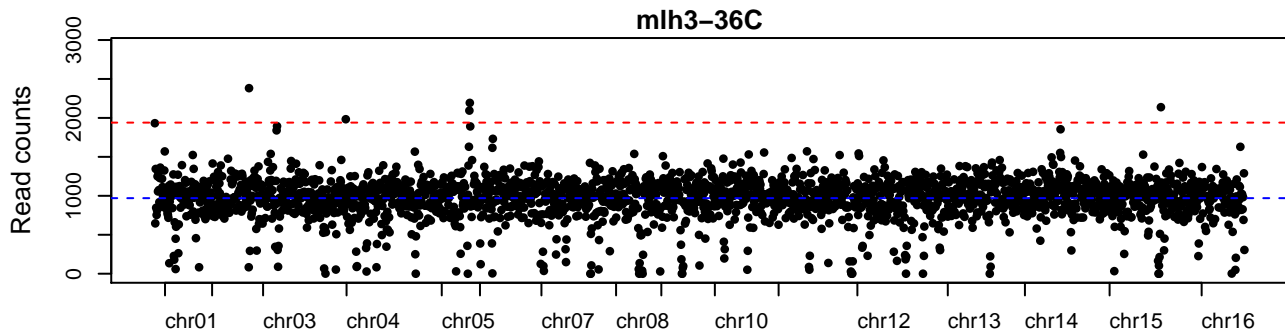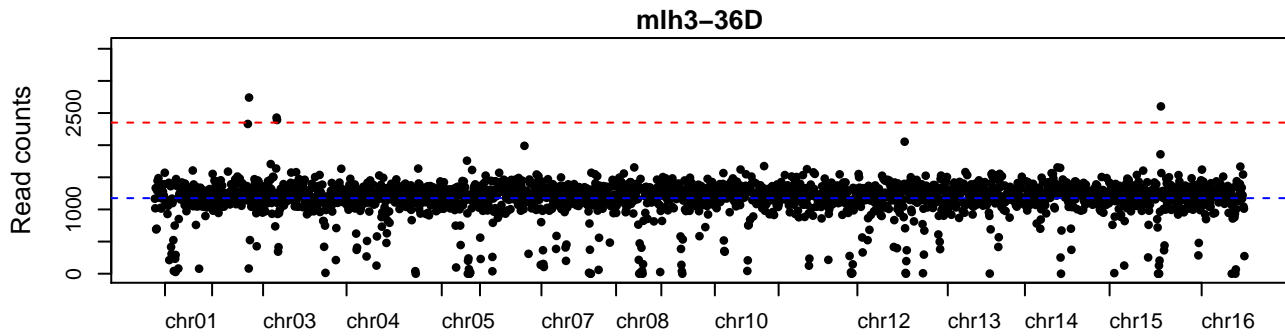

**pch2-1A**

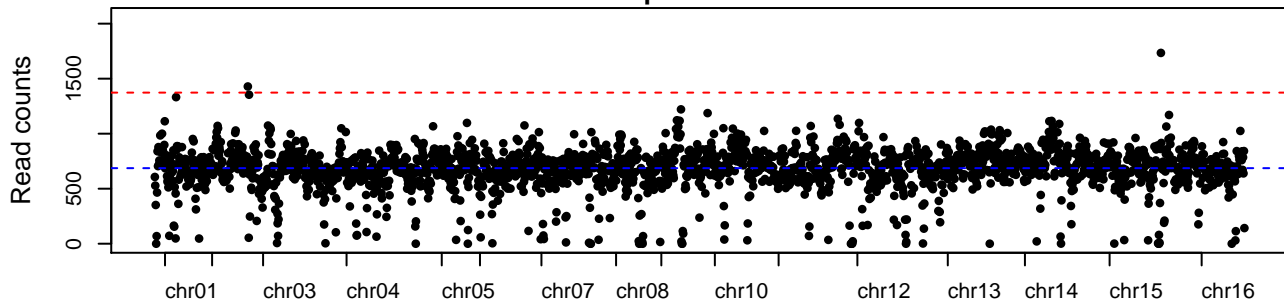

**pch2-1B**

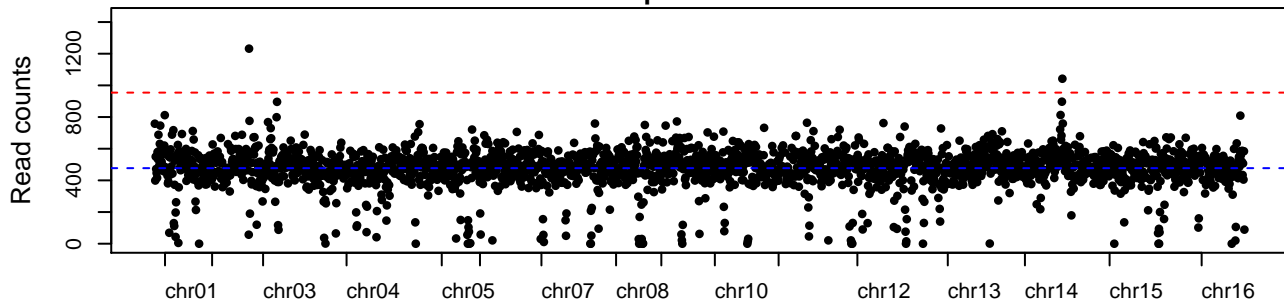

**pch2-1C**

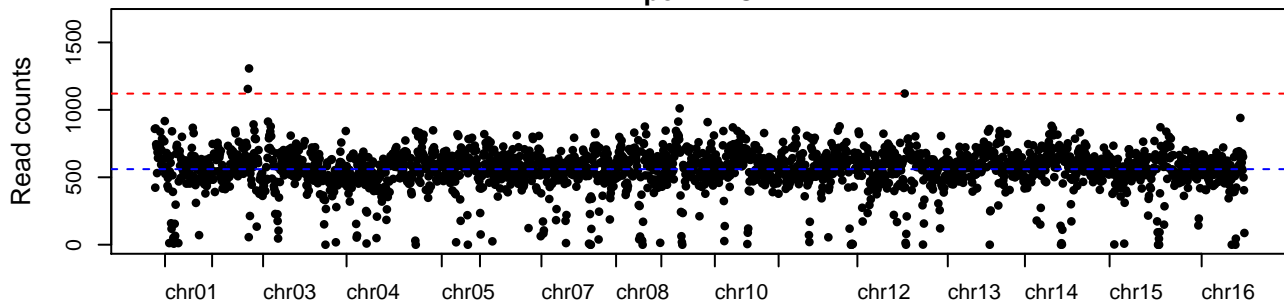

**pch2-1D**

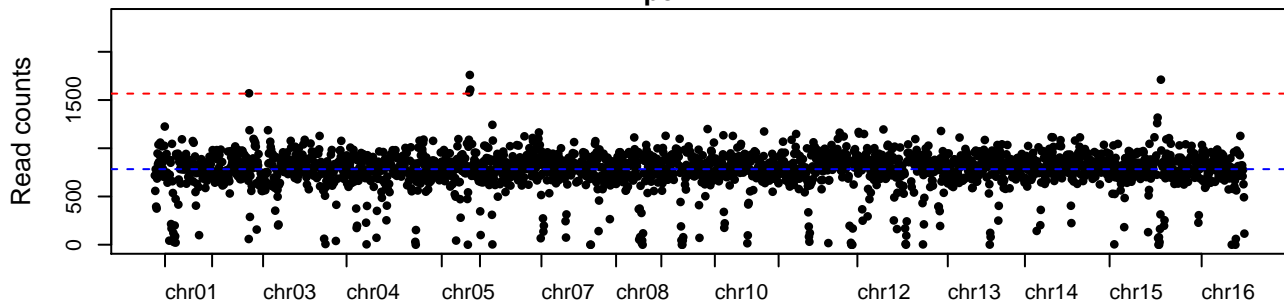

**pch2-2A**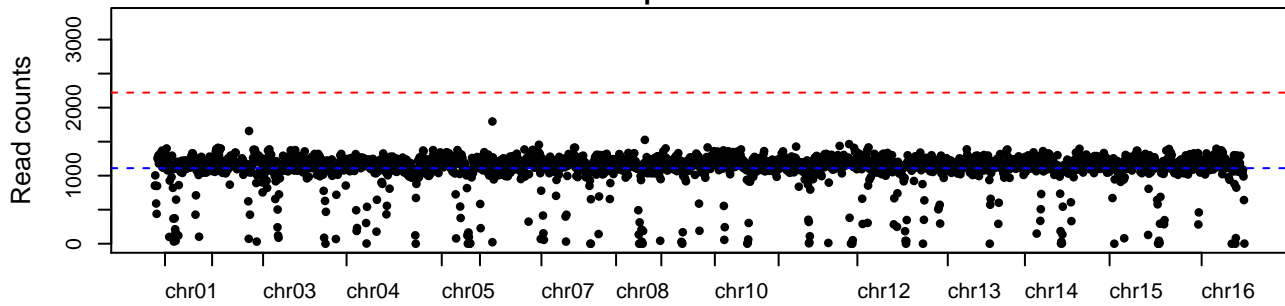**pch2-2B**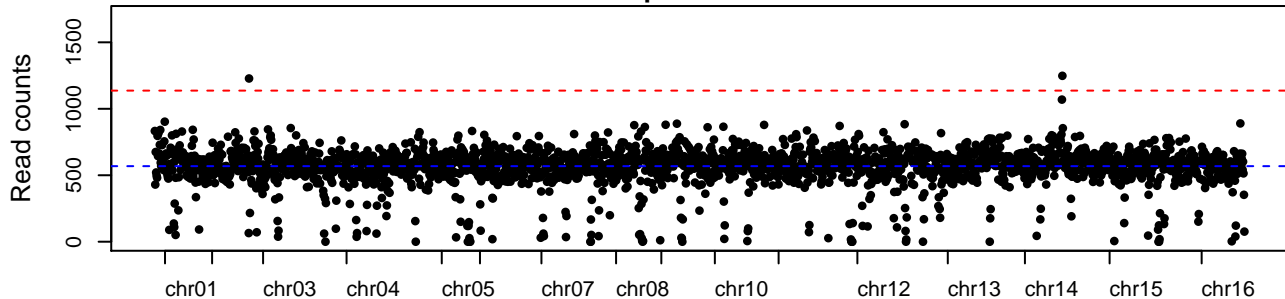**pch2-2C**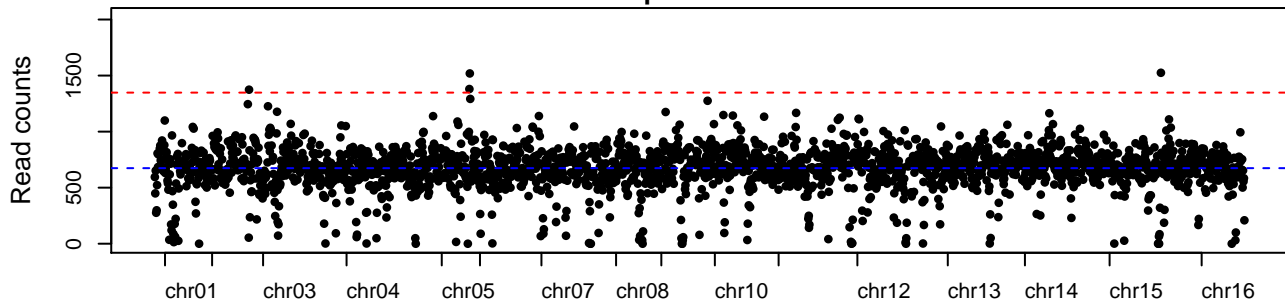**pch2-2D**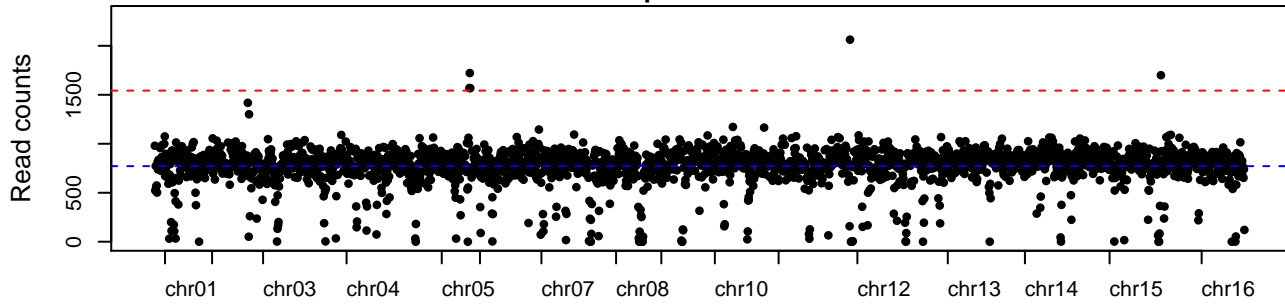

**pch2-6A**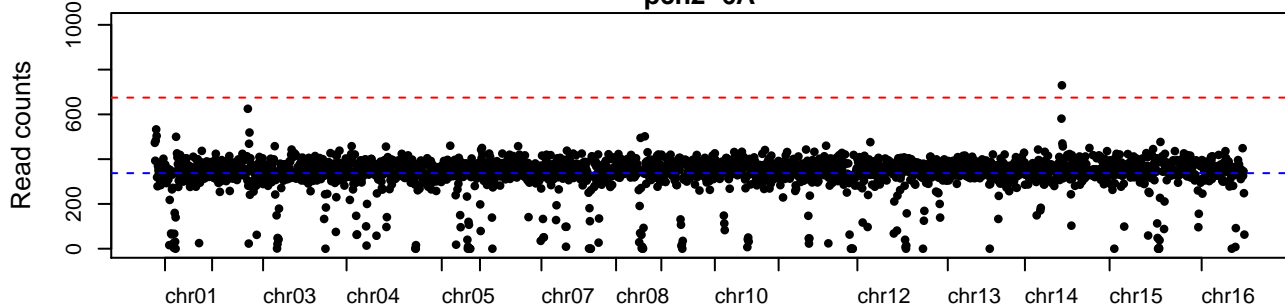**pch2-6B**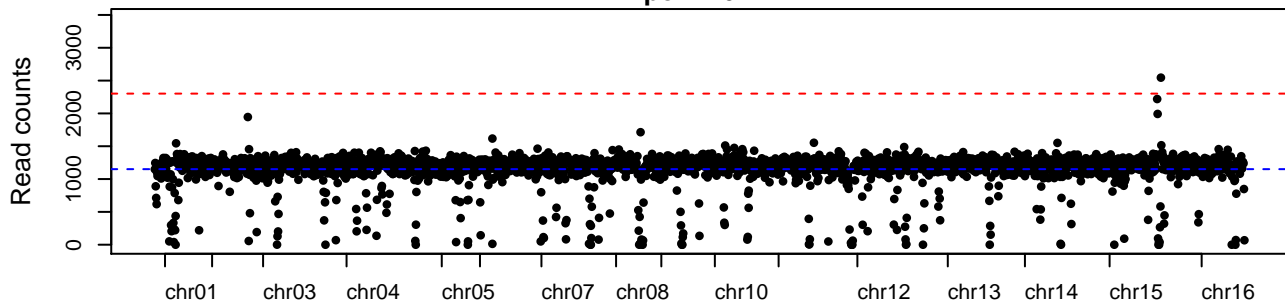**pch2-6C**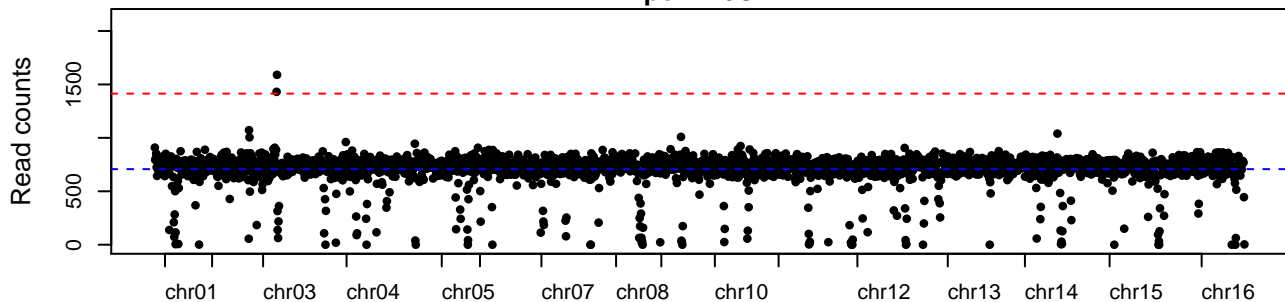**pch2-6D**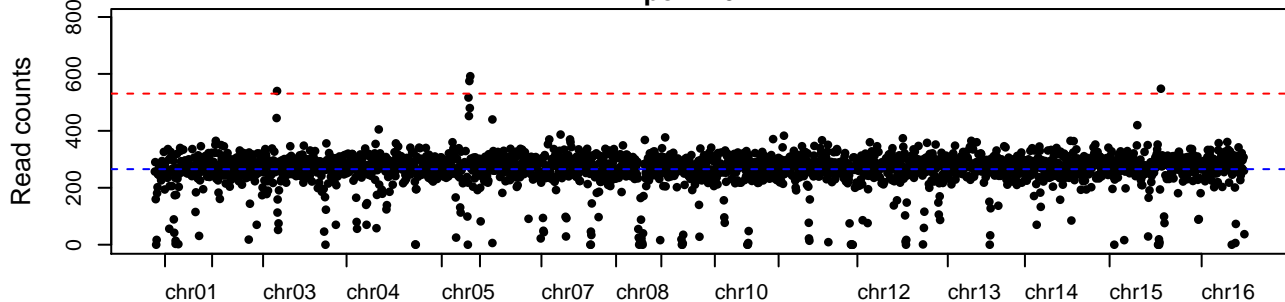

**pch2-7A**

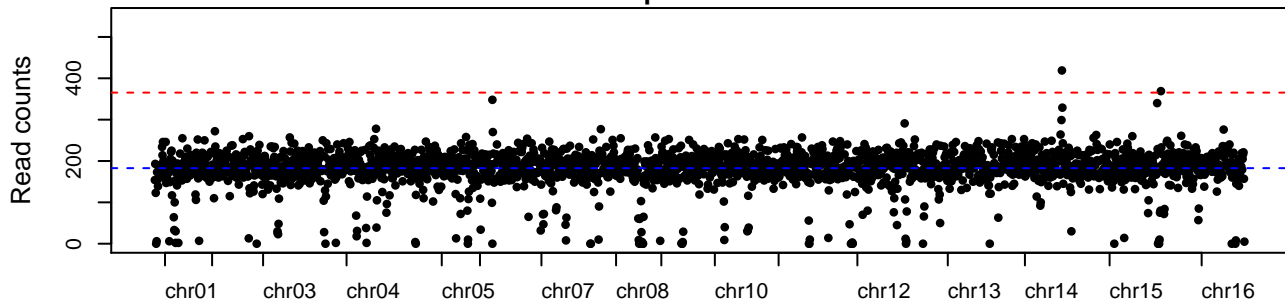

**pch2-7B**

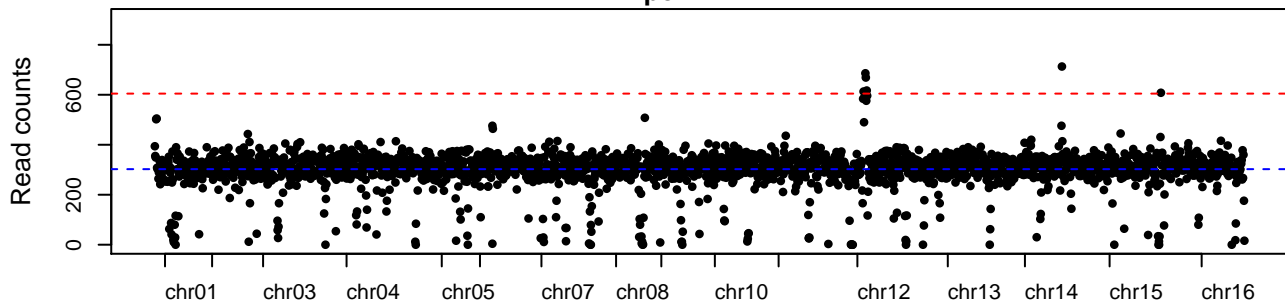

**pch2-7C**

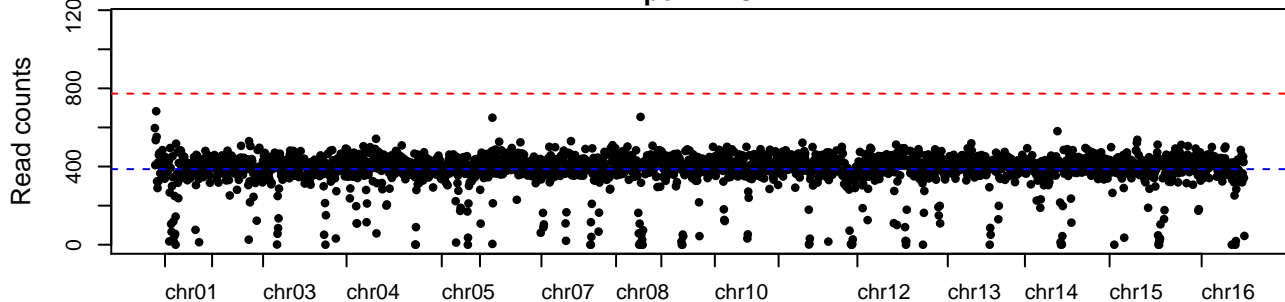

**pch2-7D**

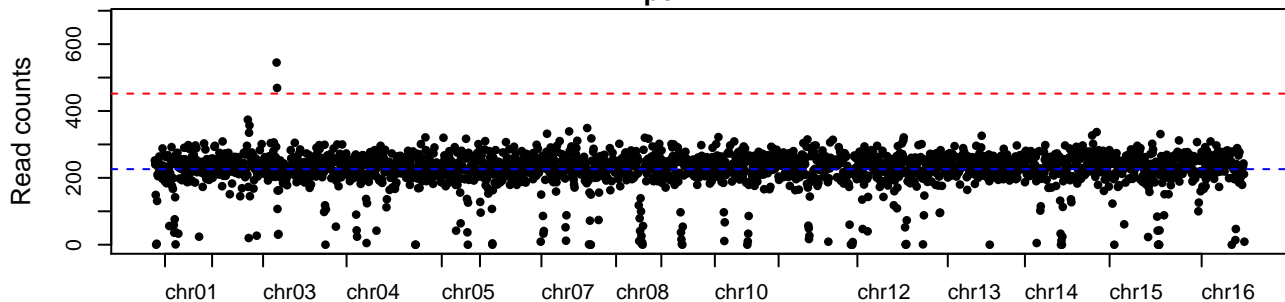

**pch2-8A**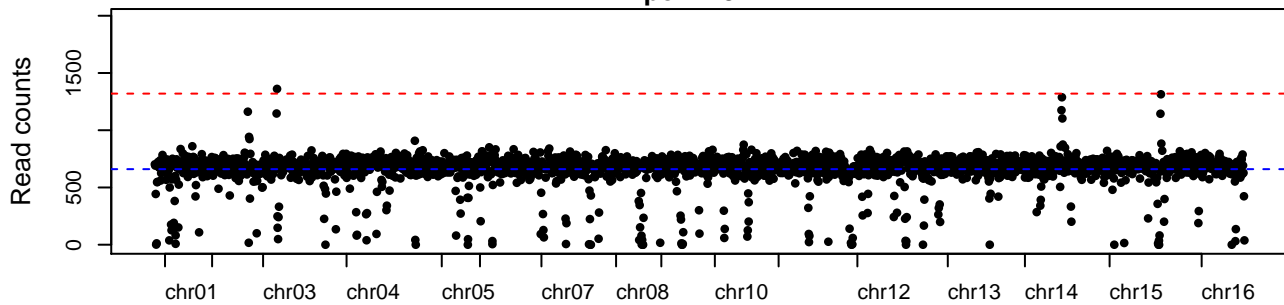**pch2-8B**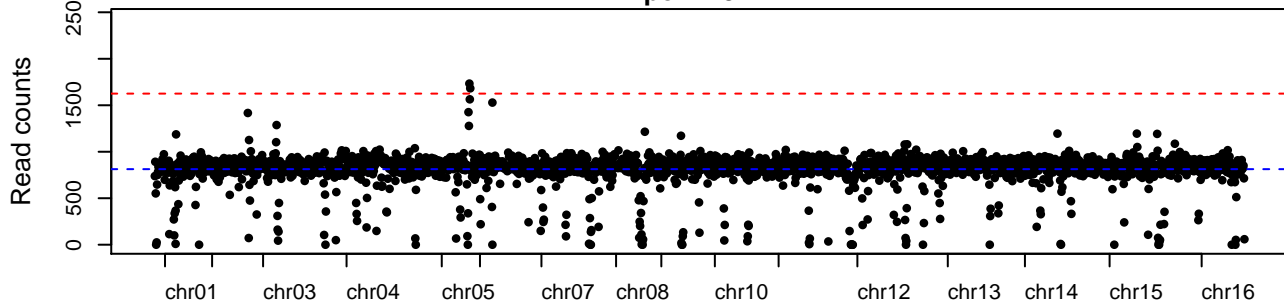**pch2-8C**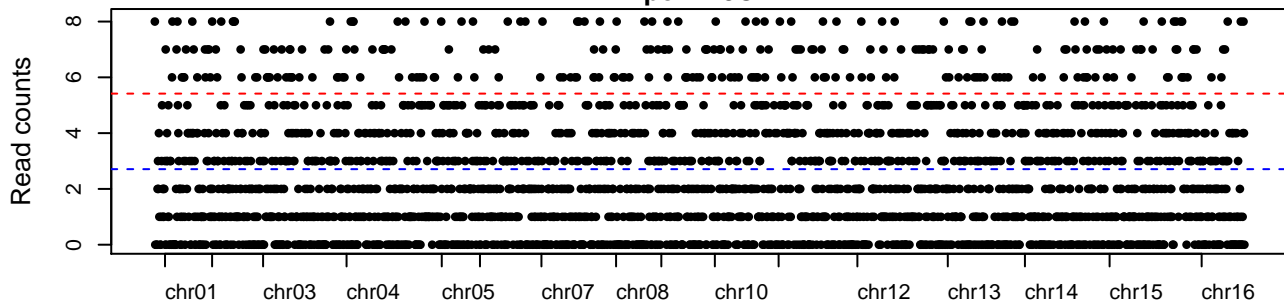**pch2-8D**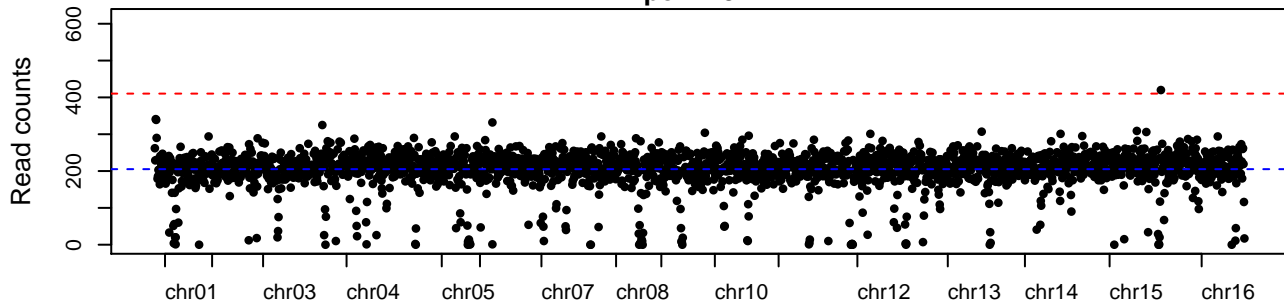



**pch2-9A**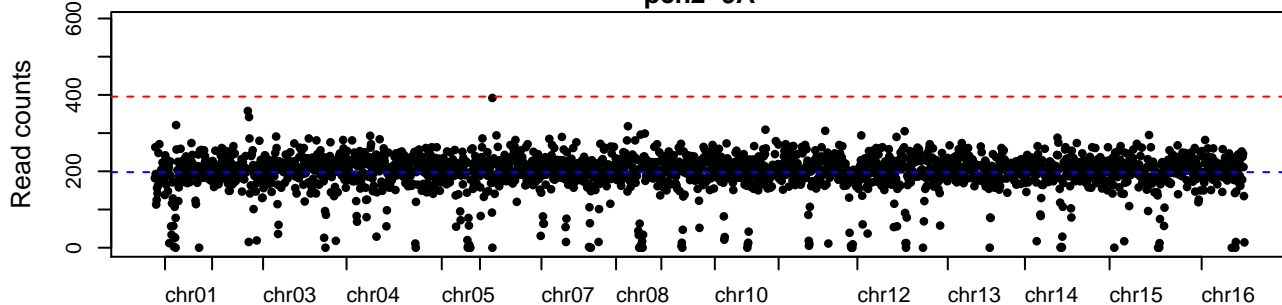**pch2-9B**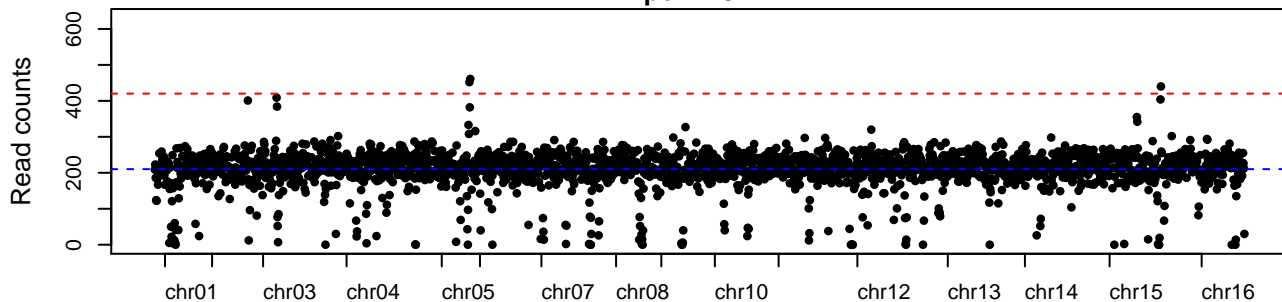**pch2-9C**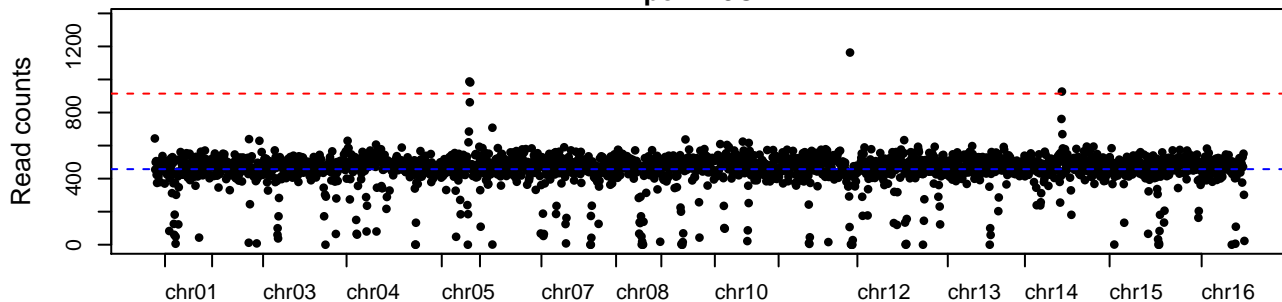**pch2-9D**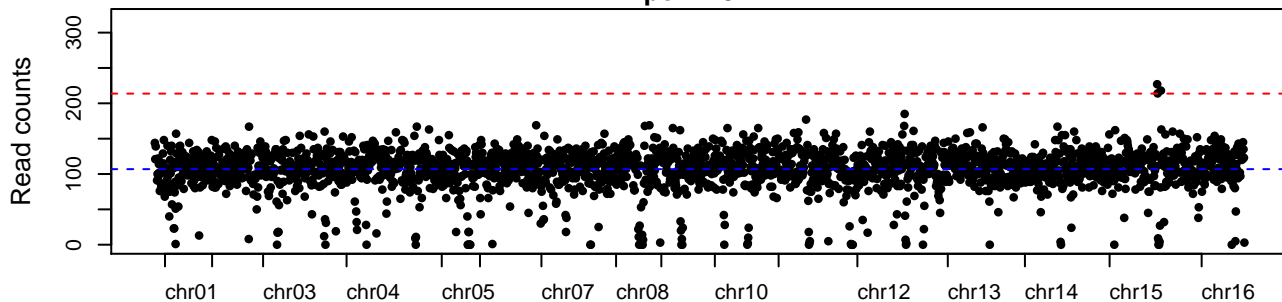

**pch2-10A**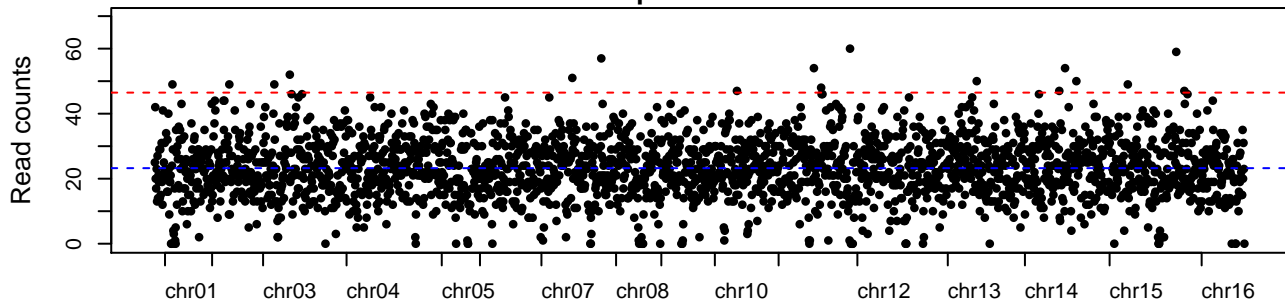**pch2-10B**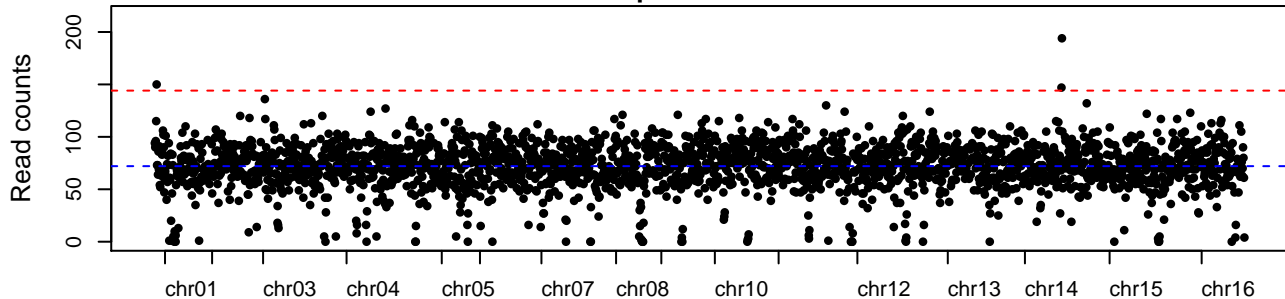**pch2-10C**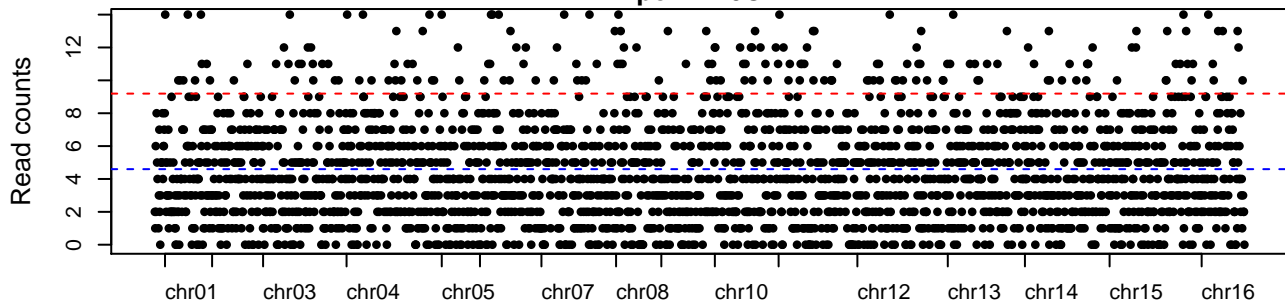**pch2-10D**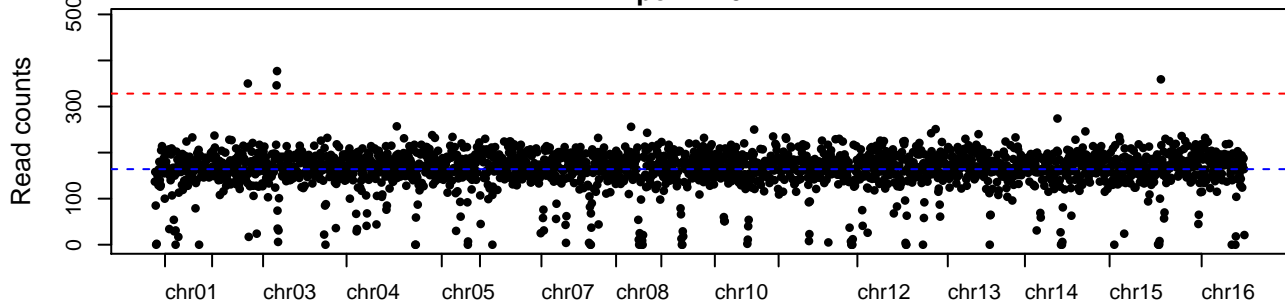

**pch2-11A**

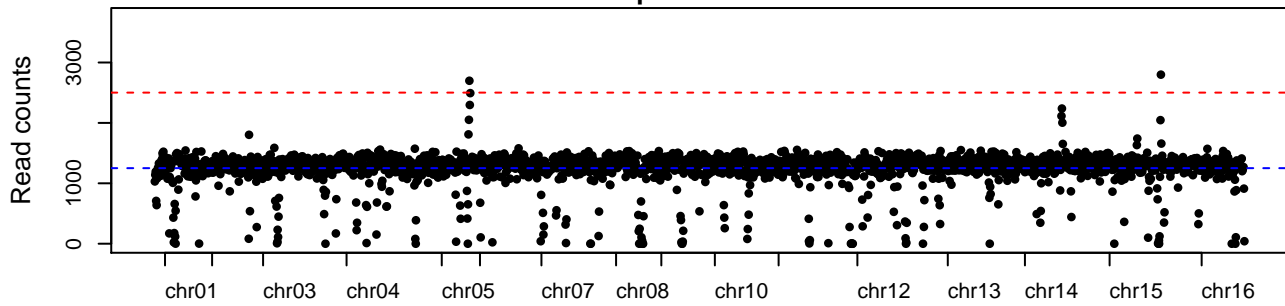

**pch2-11B**

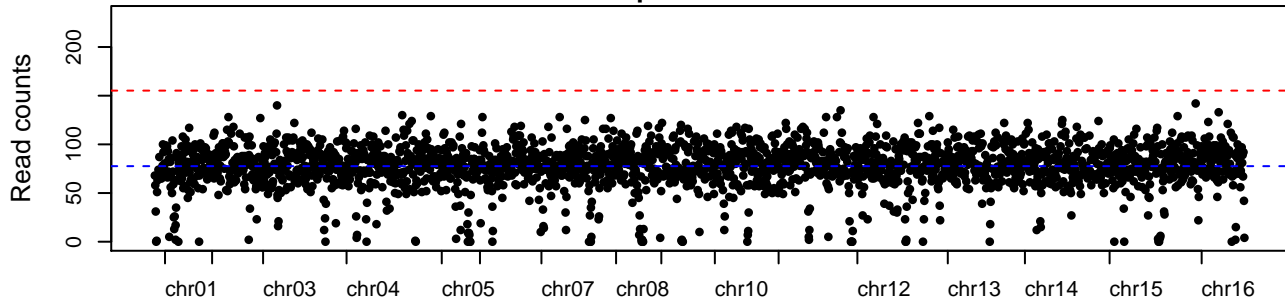

**pch2-11C**

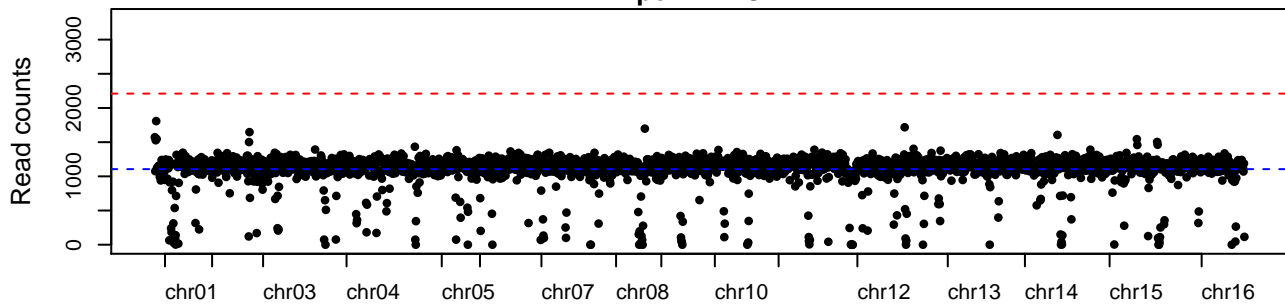

**pch2-11D**

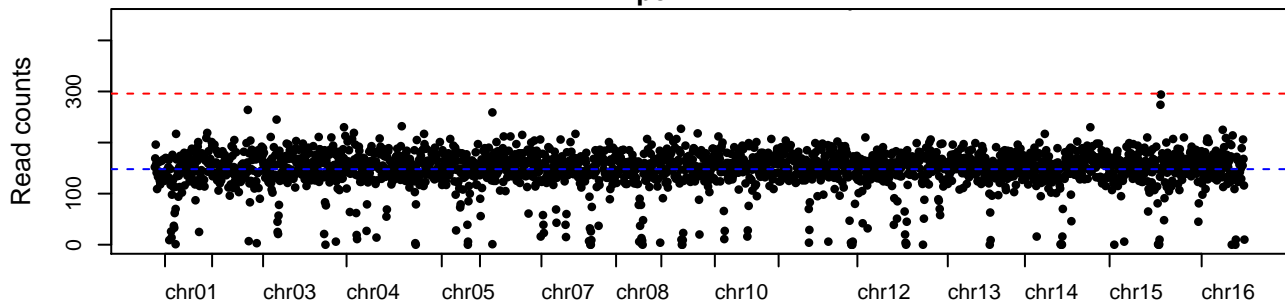

**pch2-12A**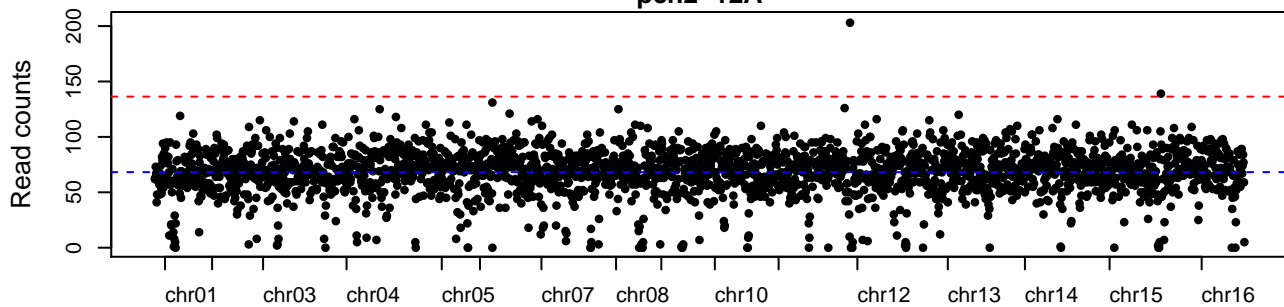**pch2-12B**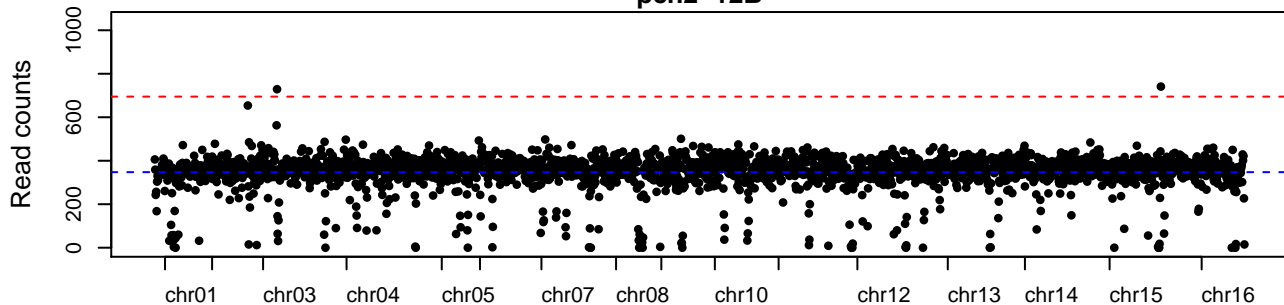**pch2-12C**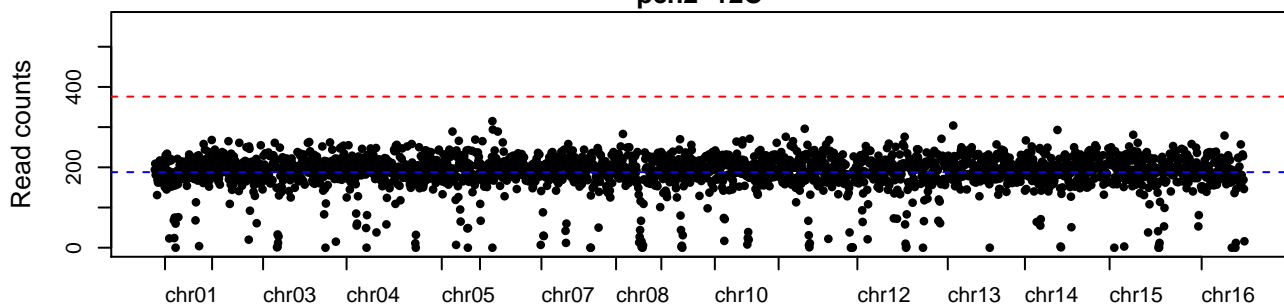**pch2-12D**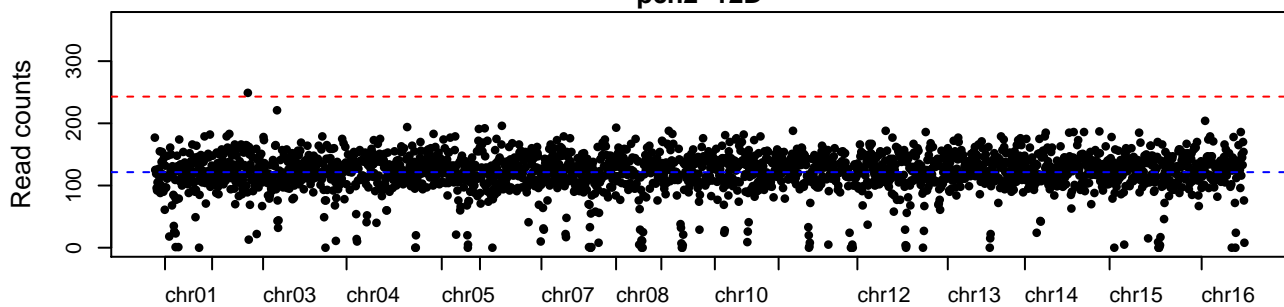

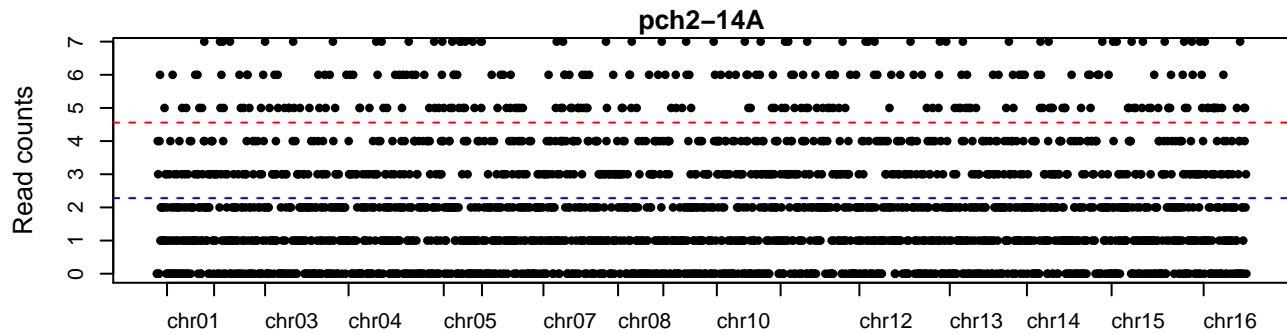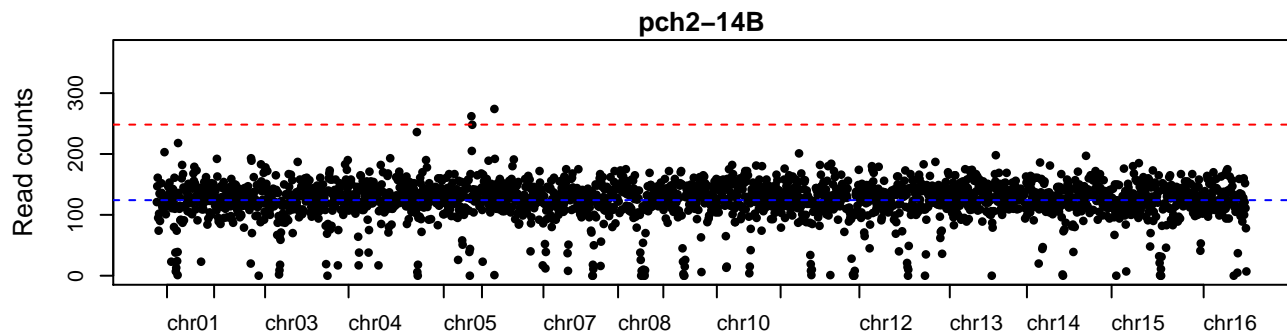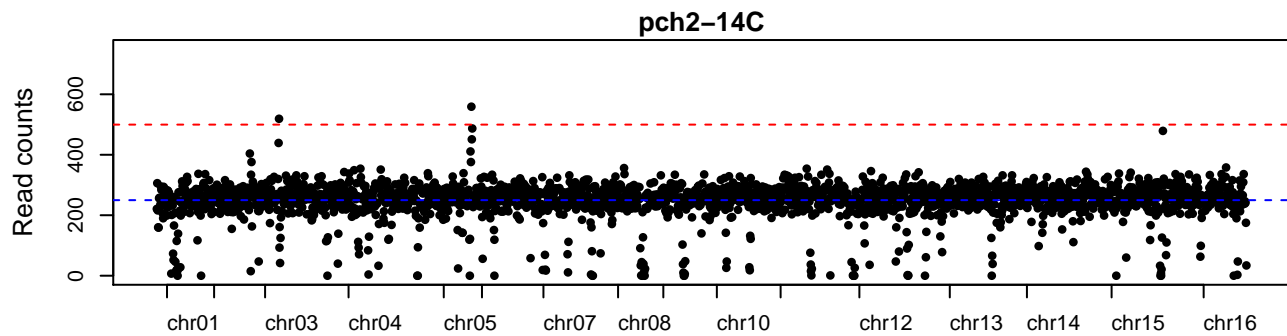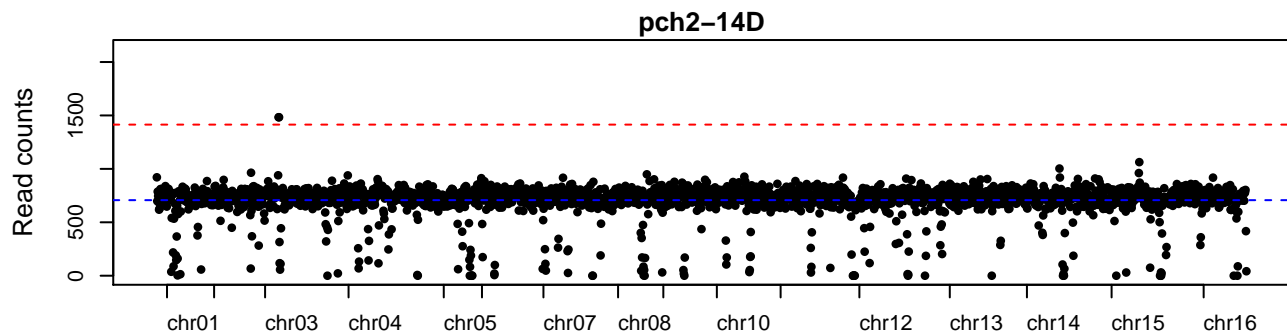

**pch2-15A**

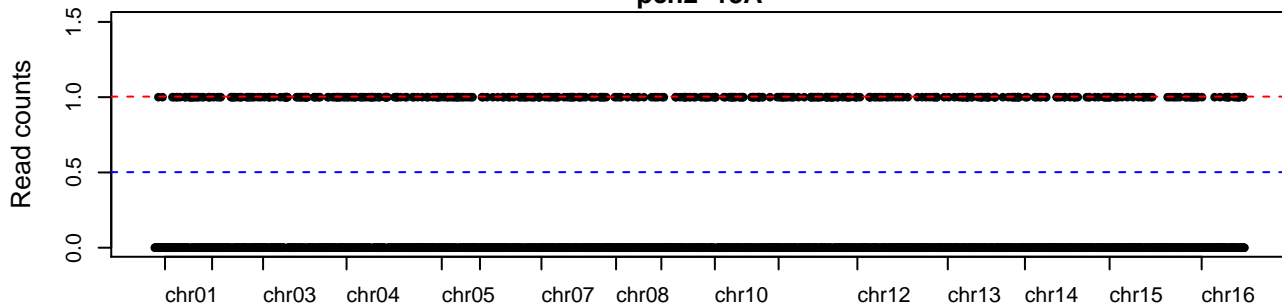

**pch2-15B**

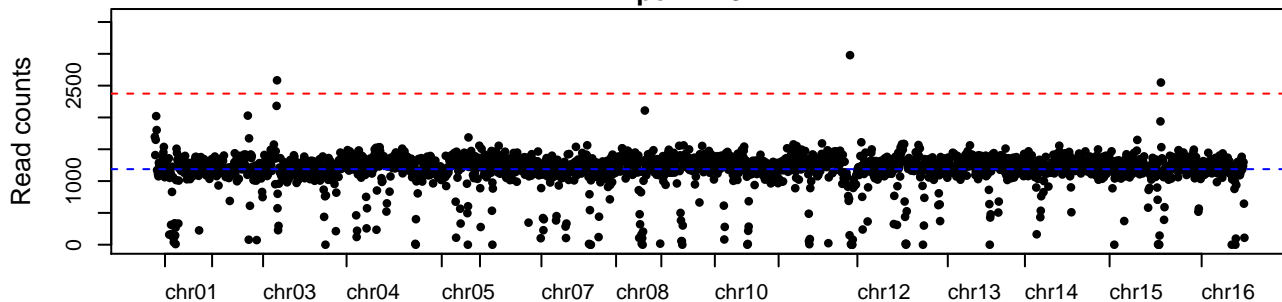

**pch2-15C**

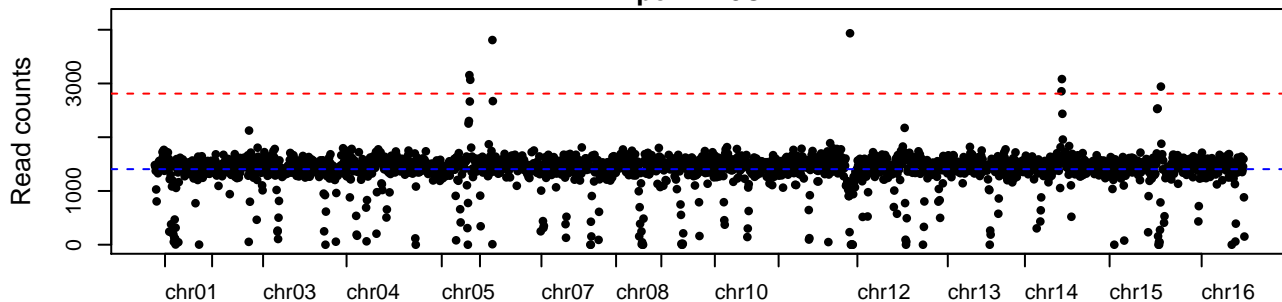

**pch2-15D**

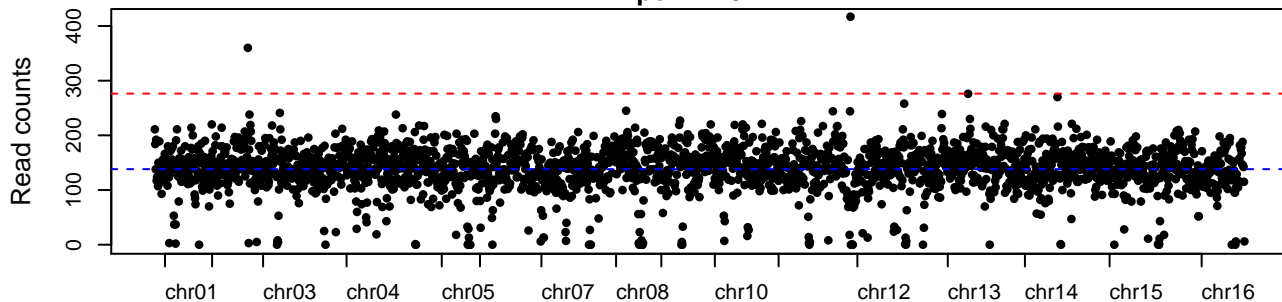

**pch2-17A**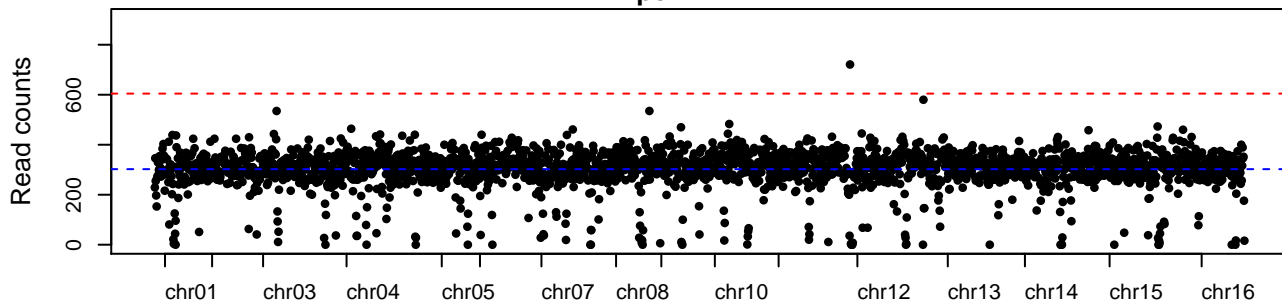**pch2-17B**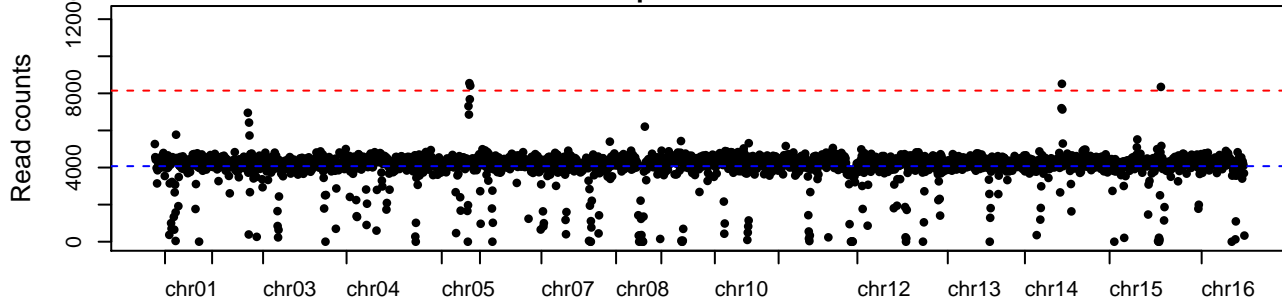**pch2-17C**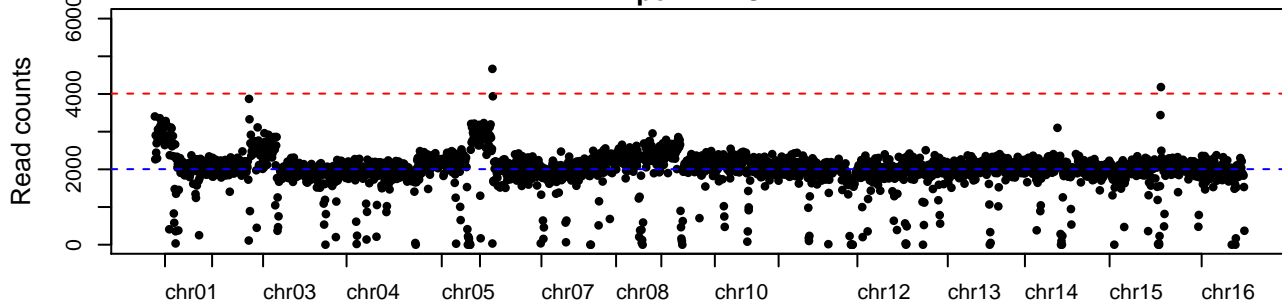**pch2-17D**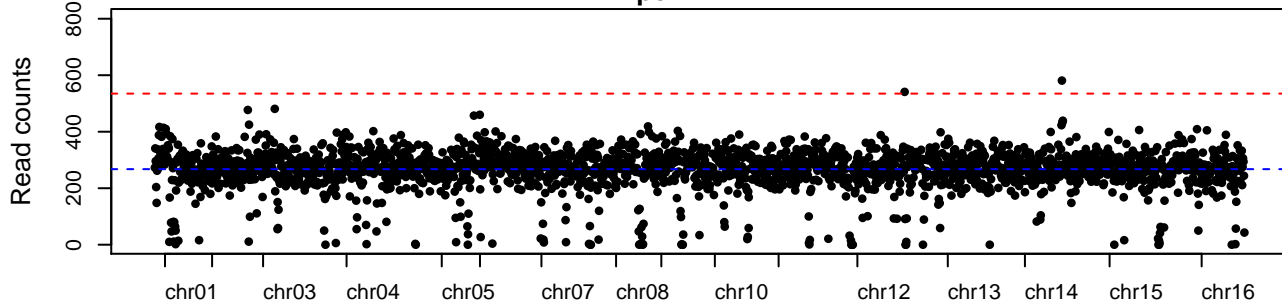

**pch2-19A**

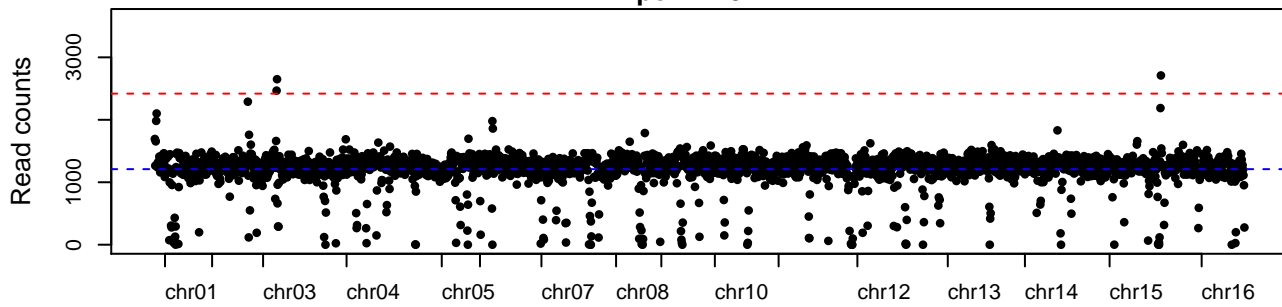

**pch2-19B**

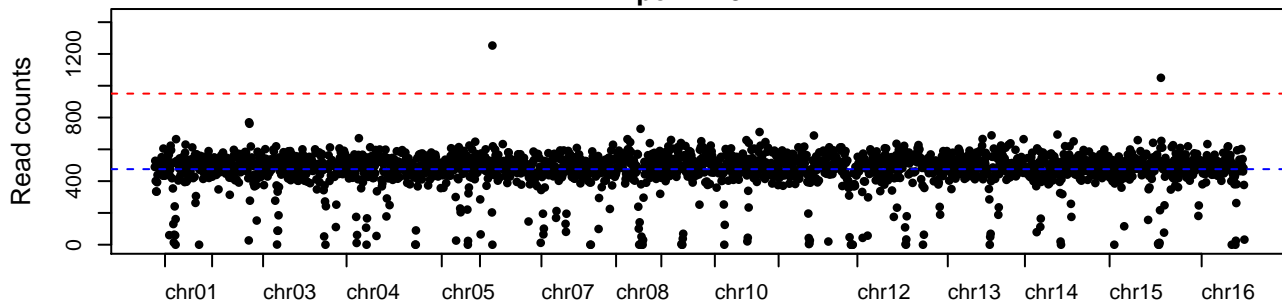

**pch2-19C**

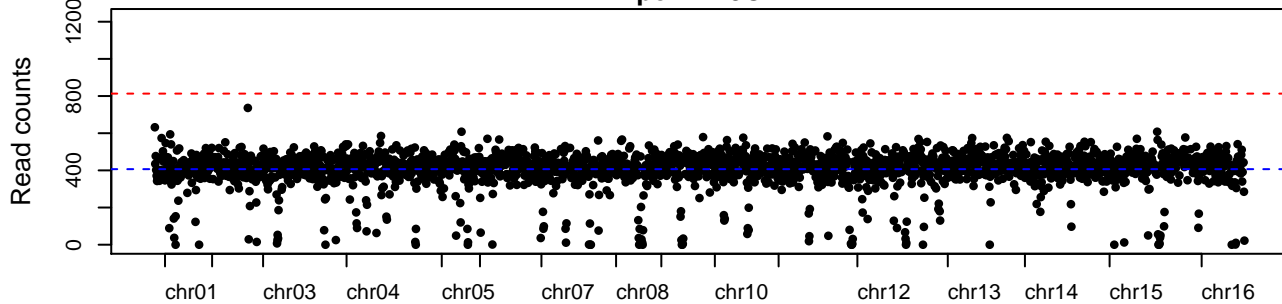

**pch2-19D**

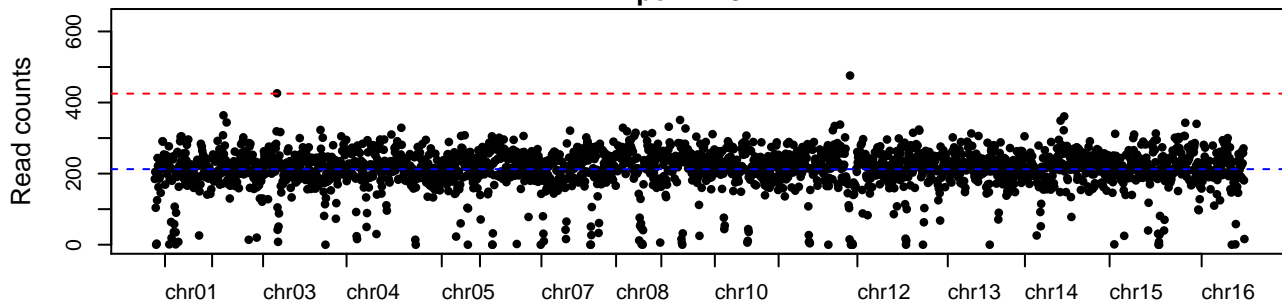



**pch2-21A**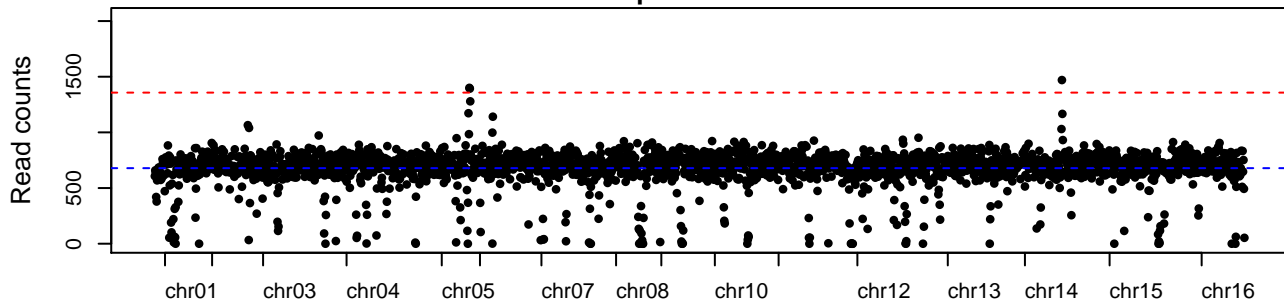**pch2-21B**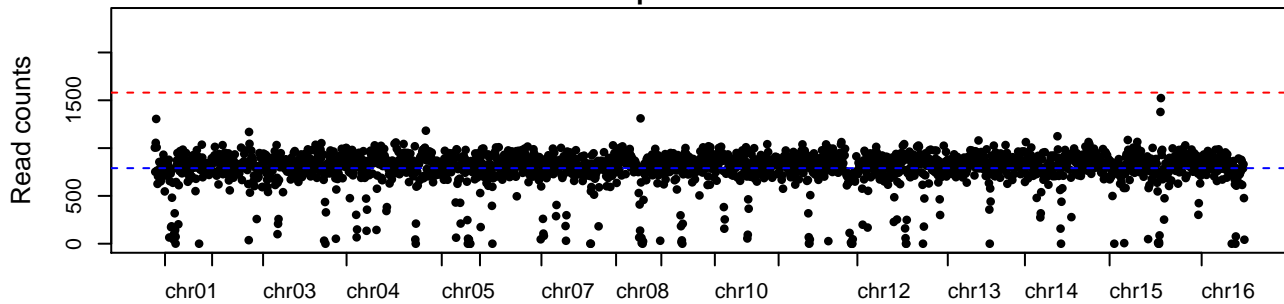**pch2-21C**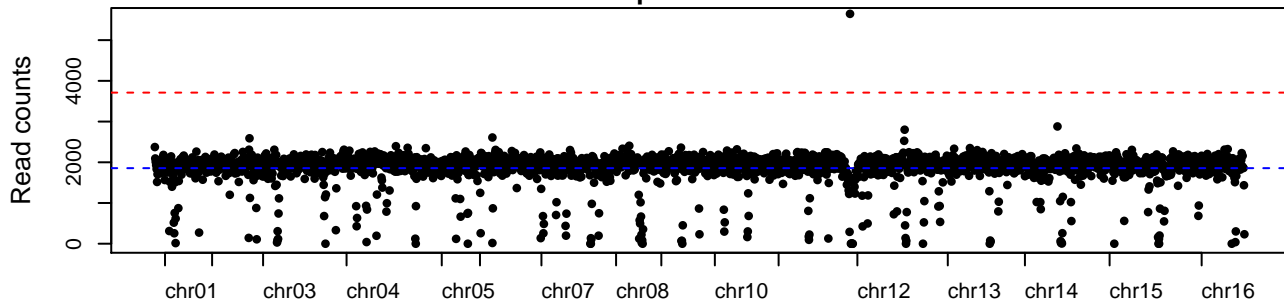**pch2-21D**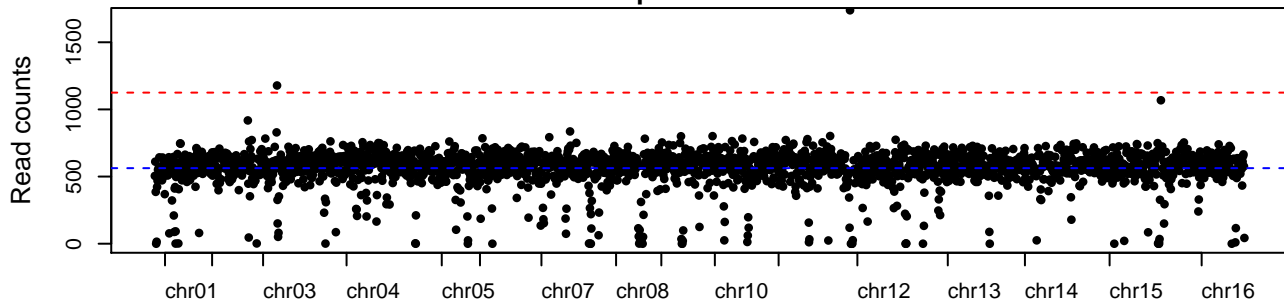

**pch2-27A**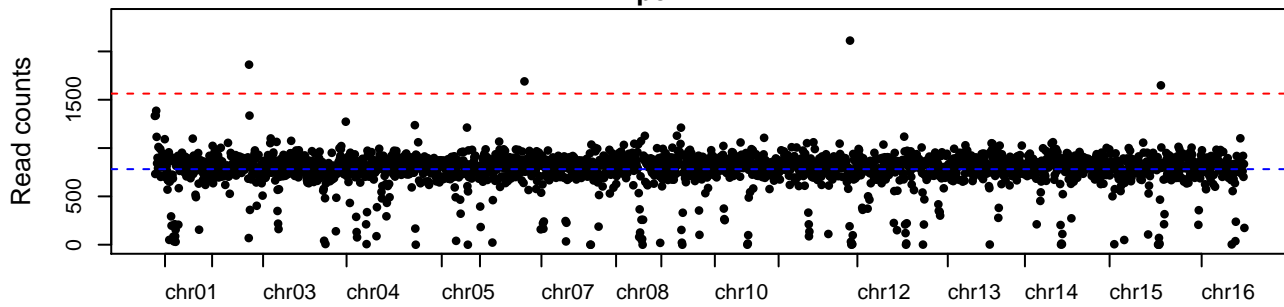**pch2-27B**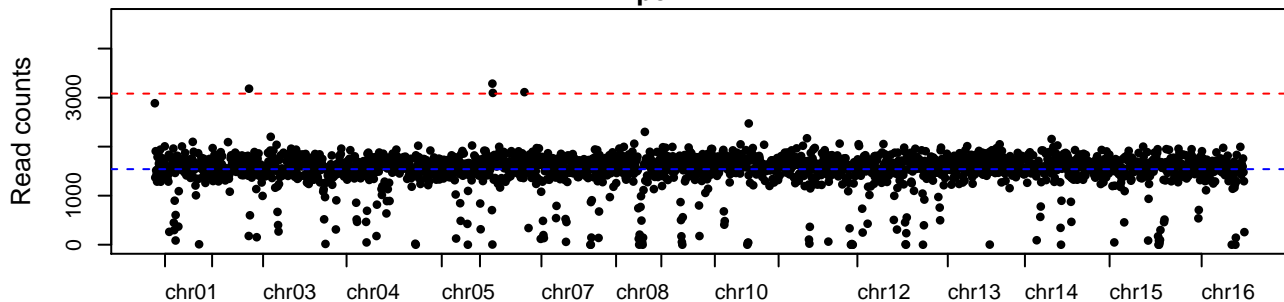**pch2-27C**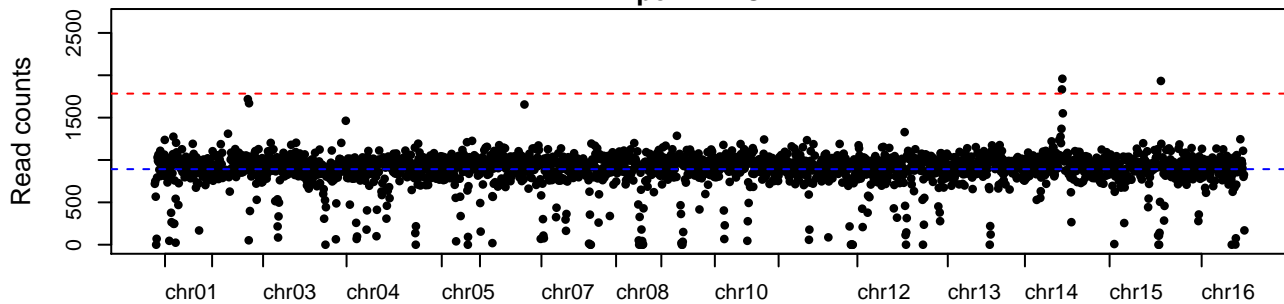**pch2-27D**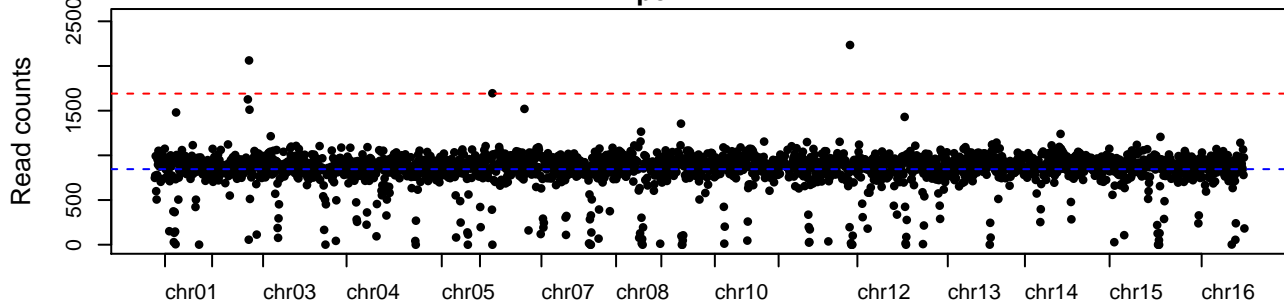

**mlh3pch2-1A**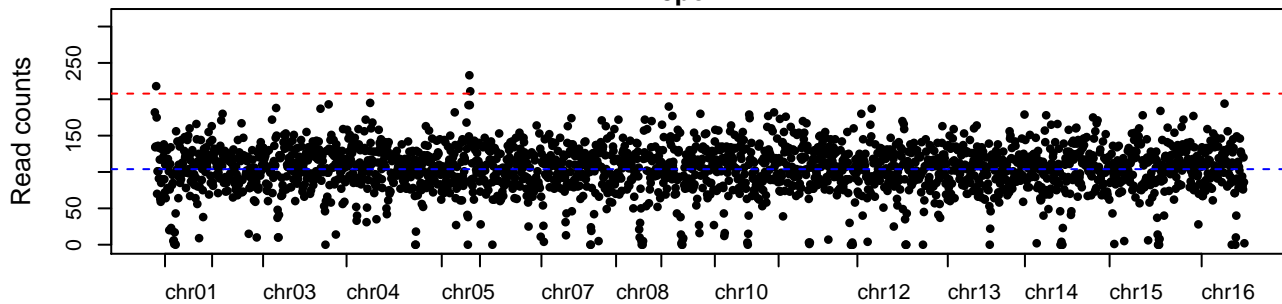**mlh3pch2-1B**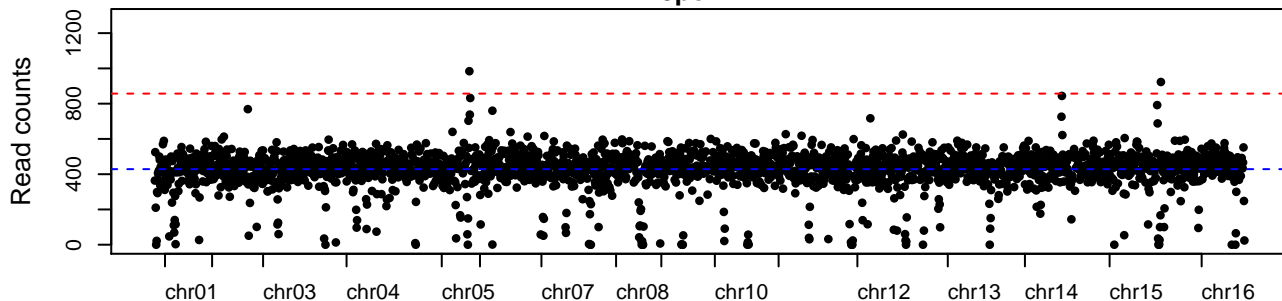**mlh3pch2-1C**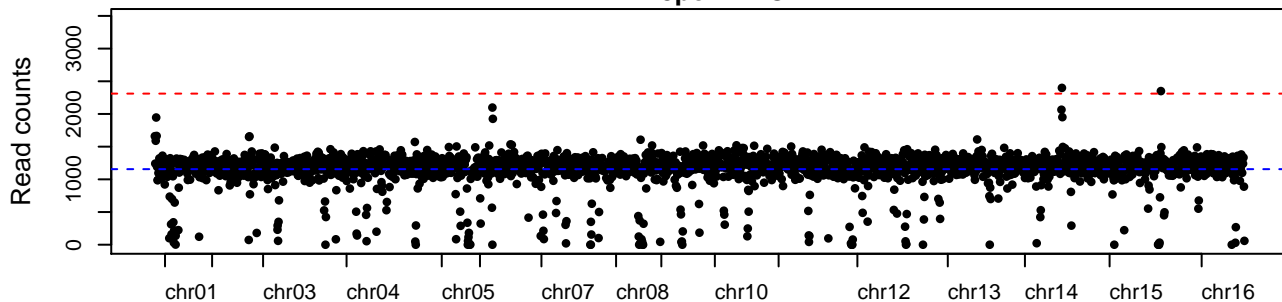**mlh3pch2-1D**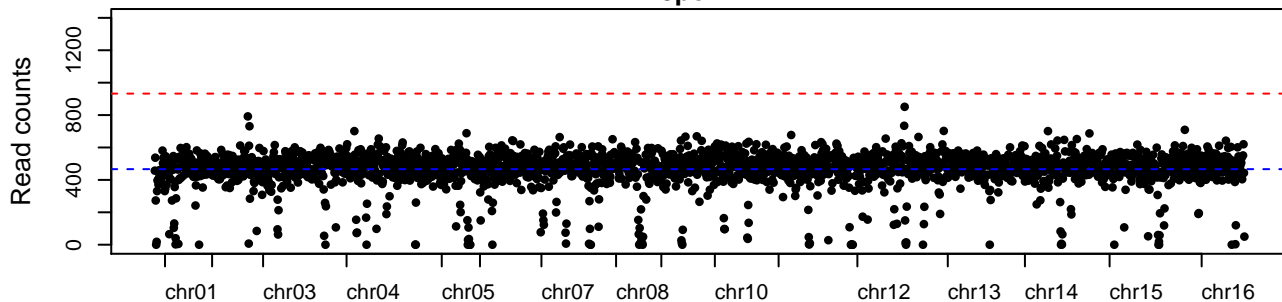

**mlh3pch2-2A**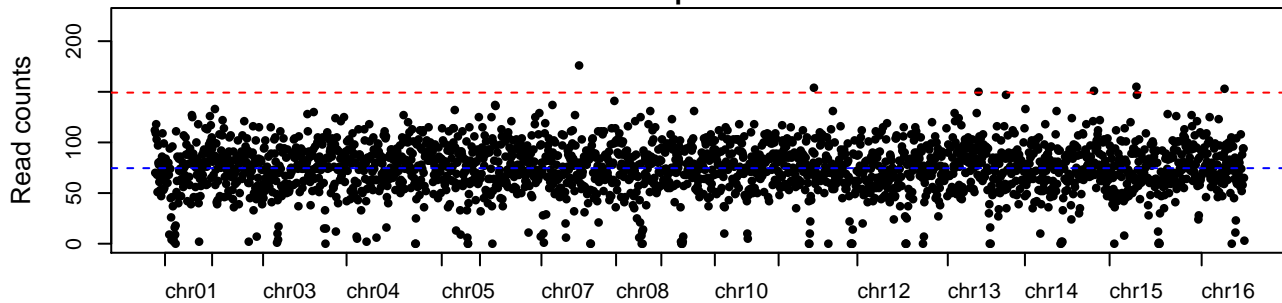**mlh3pch2-2B**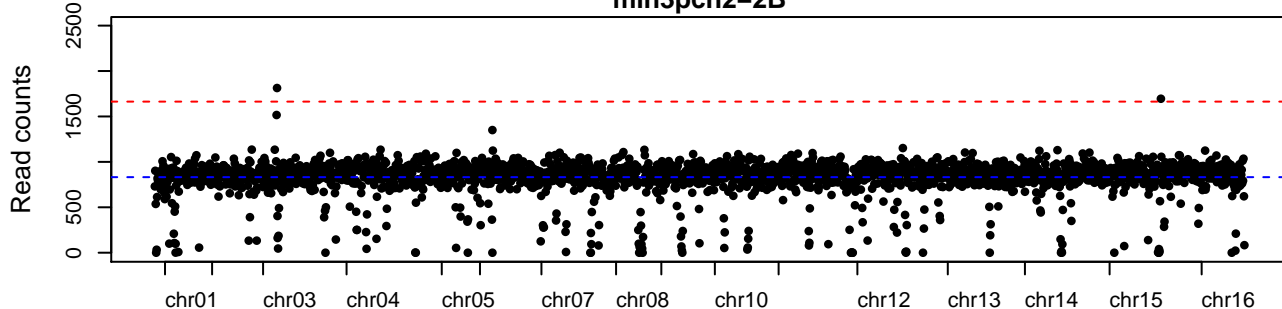**mlh3pch2-2C**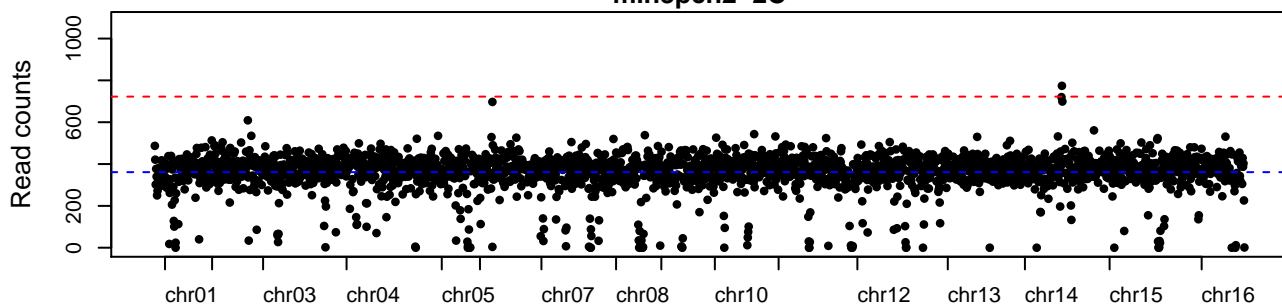**mlh3pch2-2D**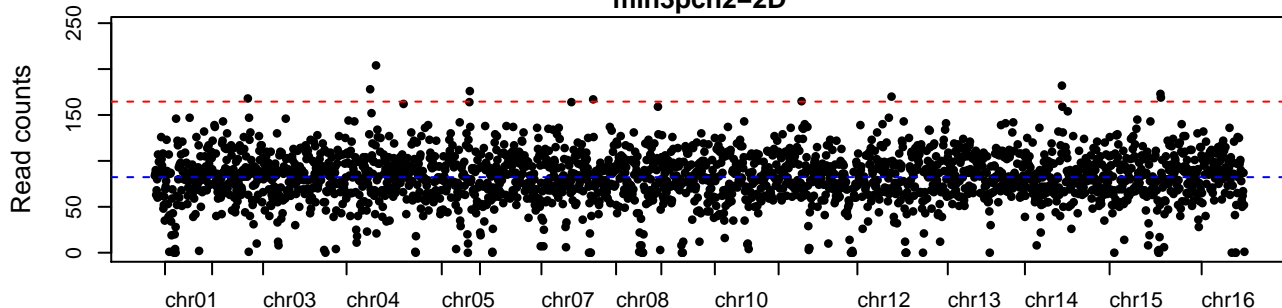

**mlh3pch2-3A**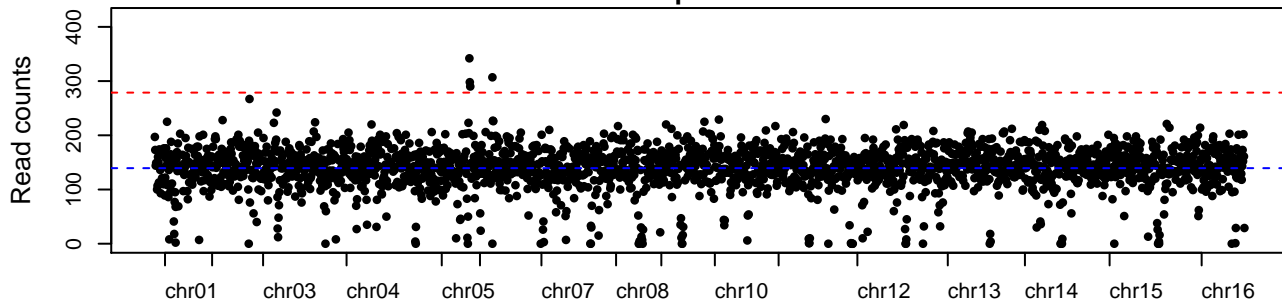**mlh3pch2-3B**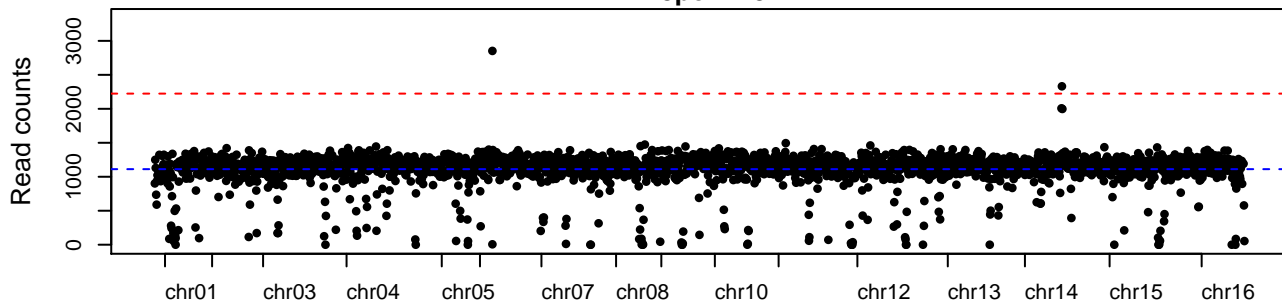**mlh3pch2-3C**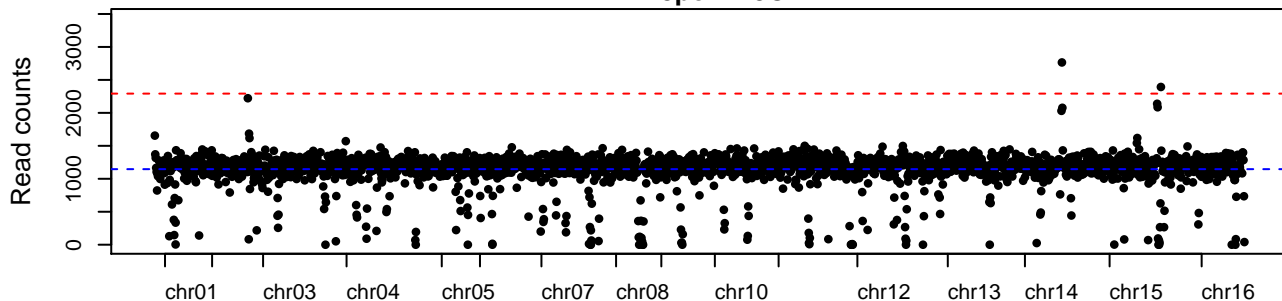**mlh3pch2-3D**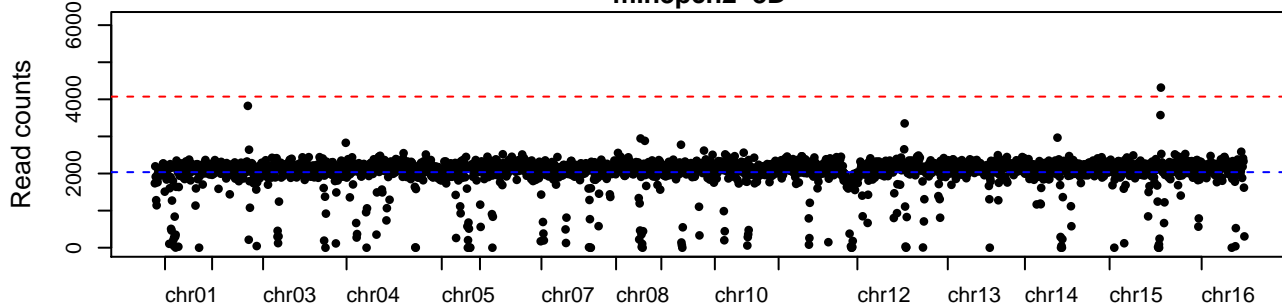

**mlh3pch2-4A**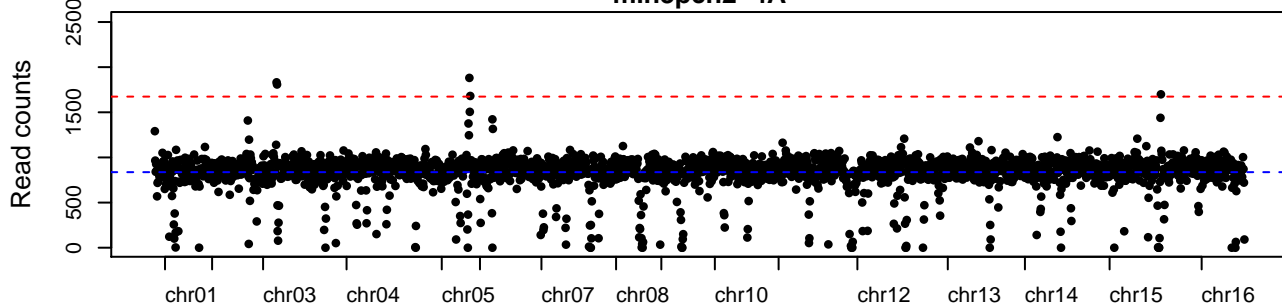**mlh3pch2-4B**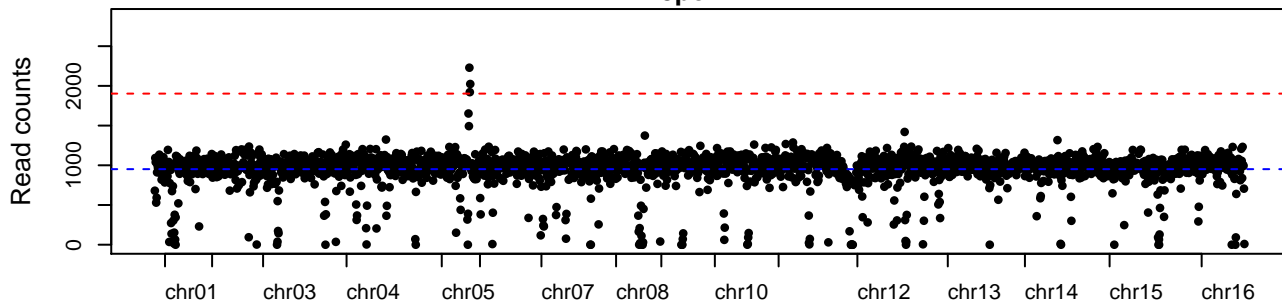**mlh3pch2-4C**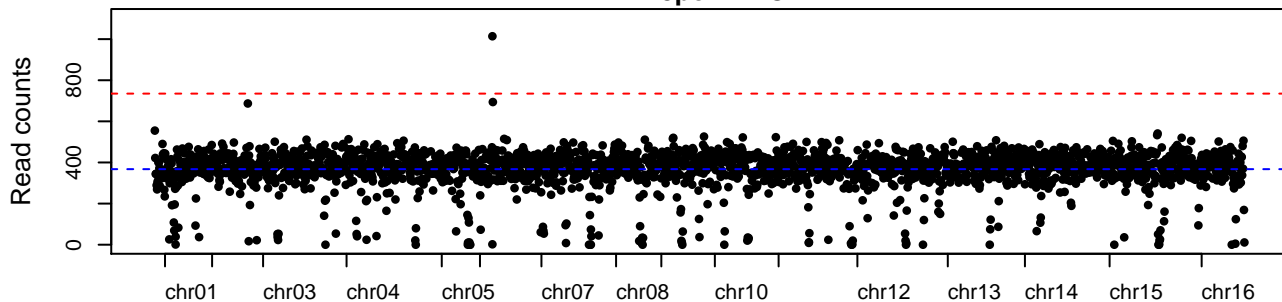**mlh3pch2-4D**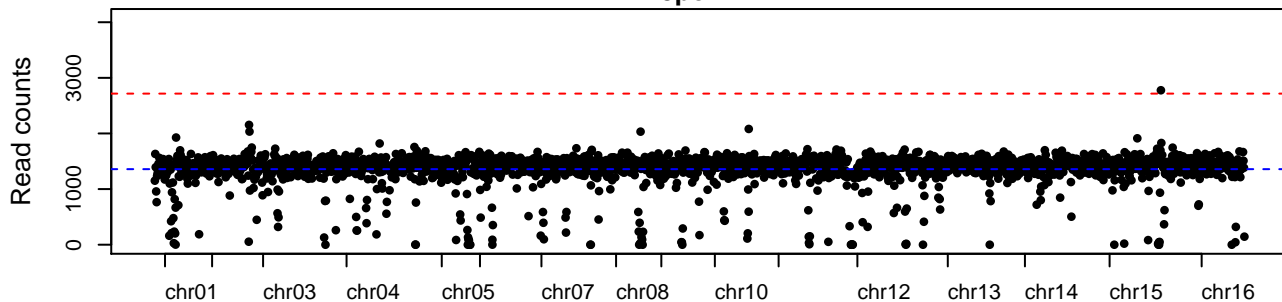

**mlh3pch2-5A**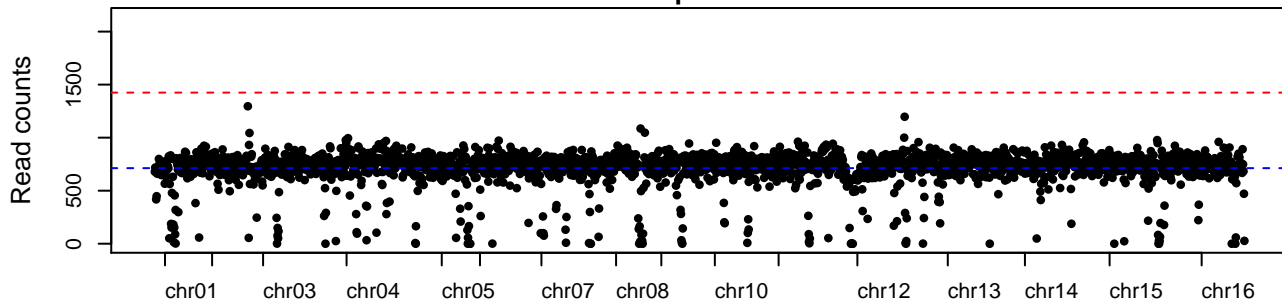**mlh3pch2-5B**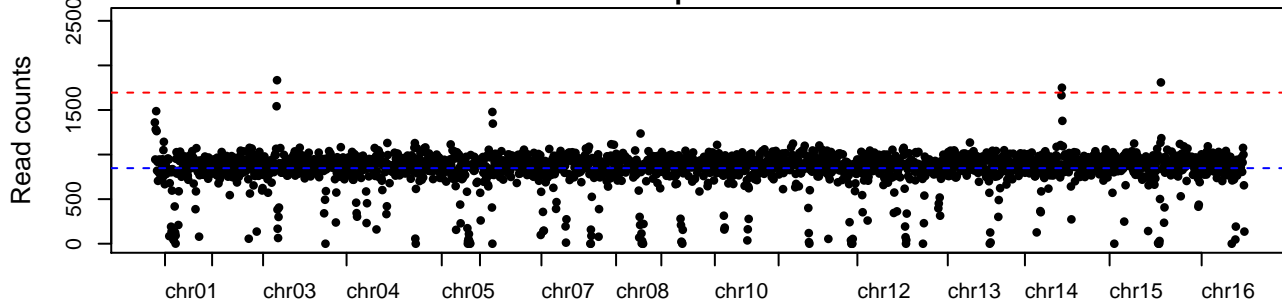**mlh3pch2-5C**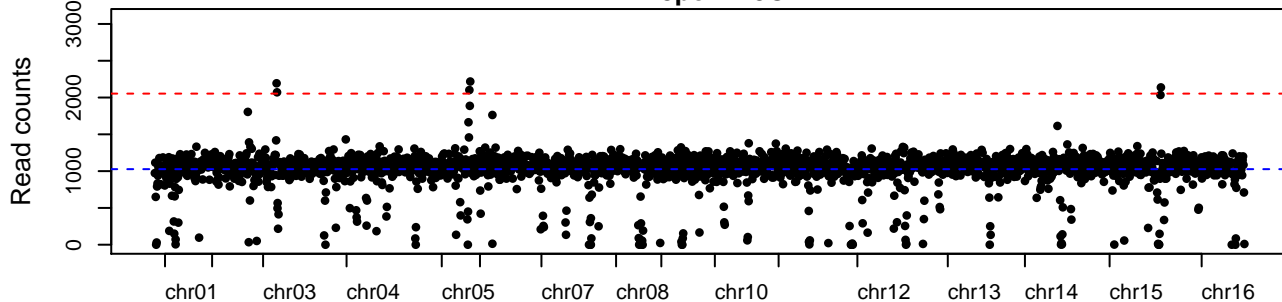**mlh3pch2-5D**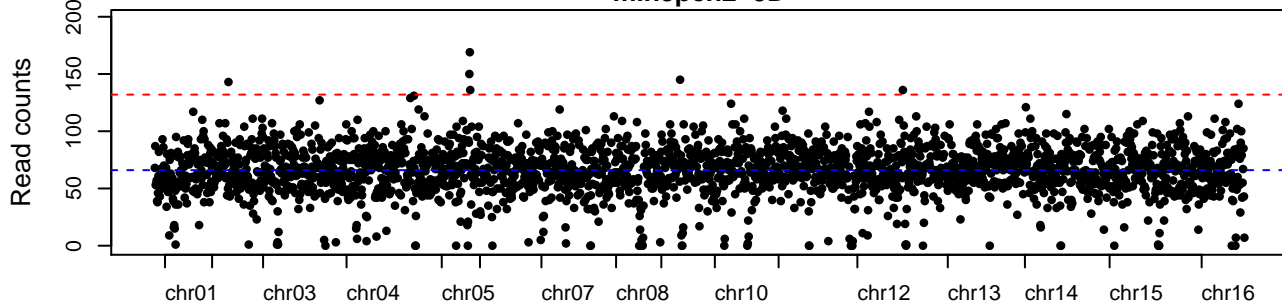

**mlh3pch2-6A**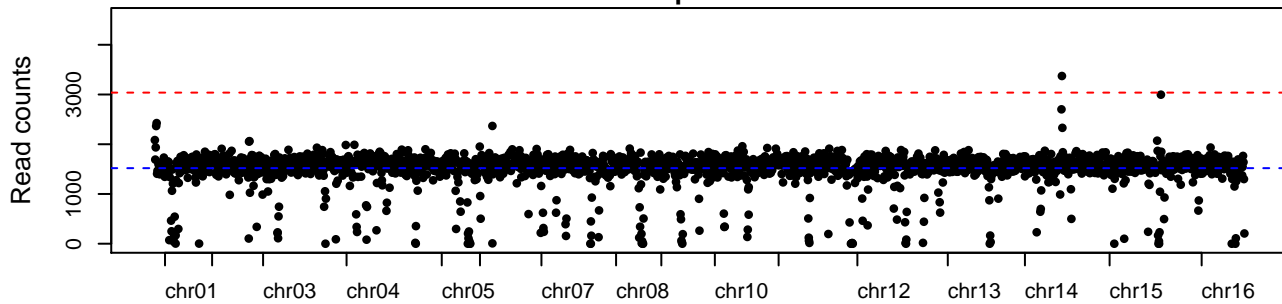**mlh3pch2-6B**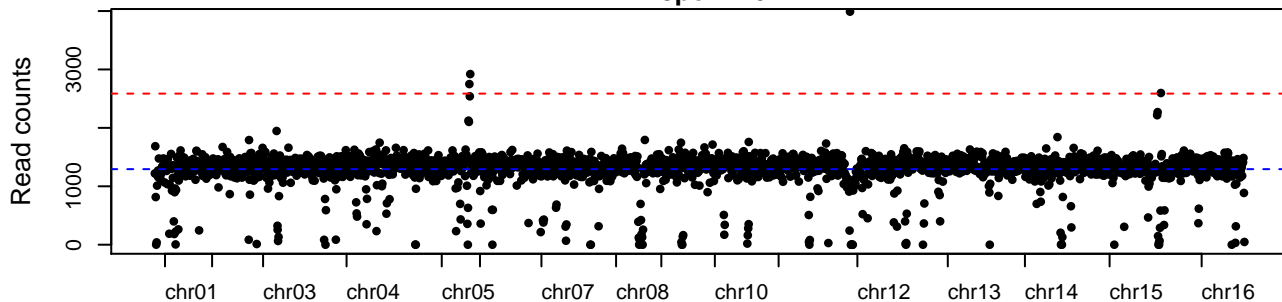**mlh3pch2-6C**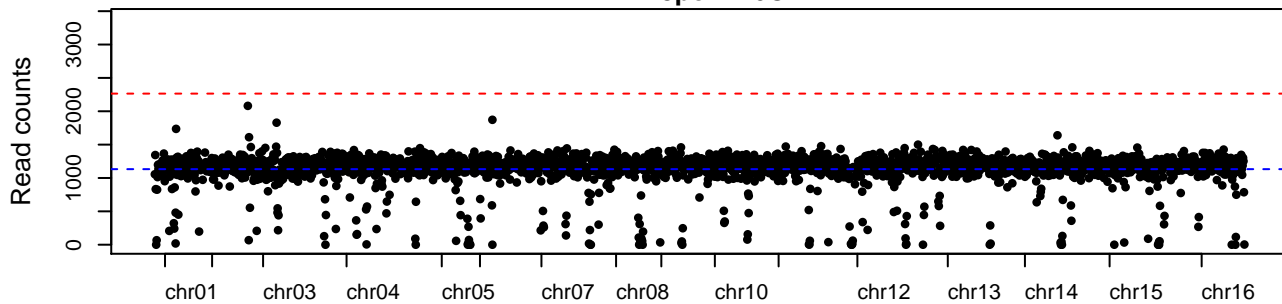**mlh3pch2-6D**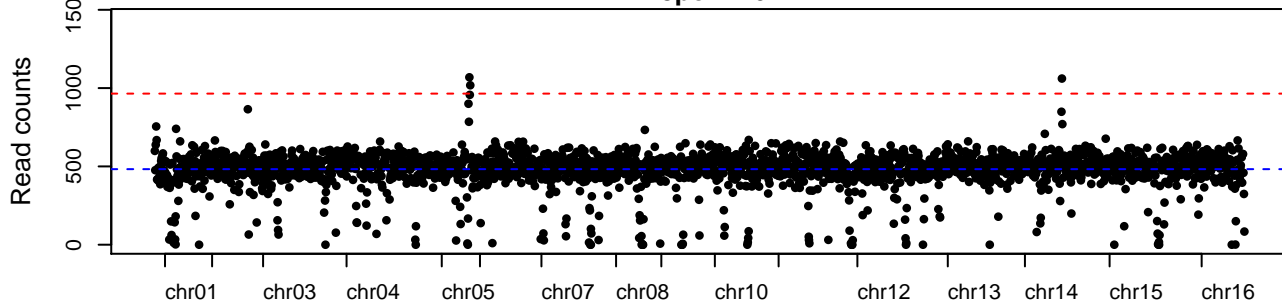



**mlh3pch2-7A**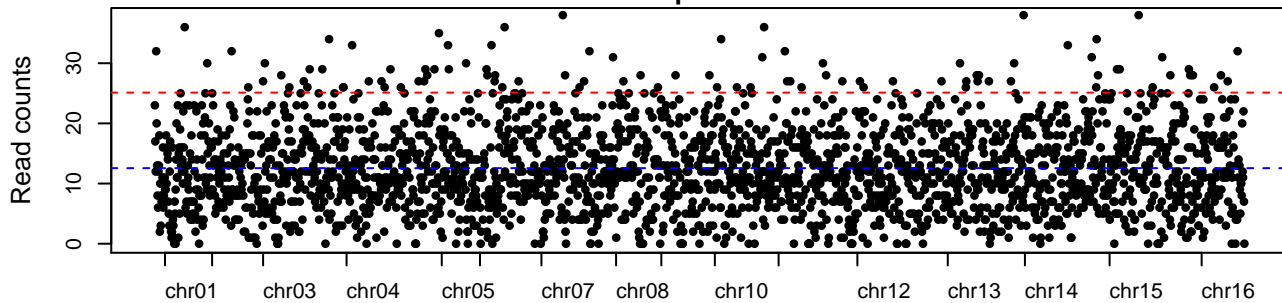**mlh3pch2-7B**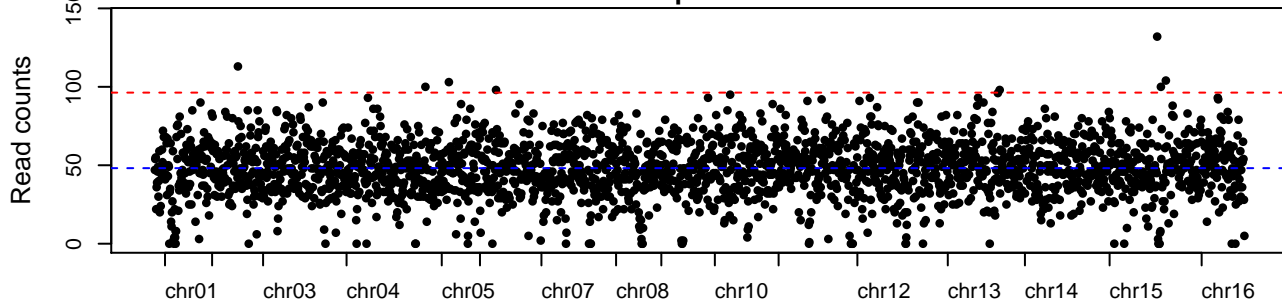**mlh3pch2-7C**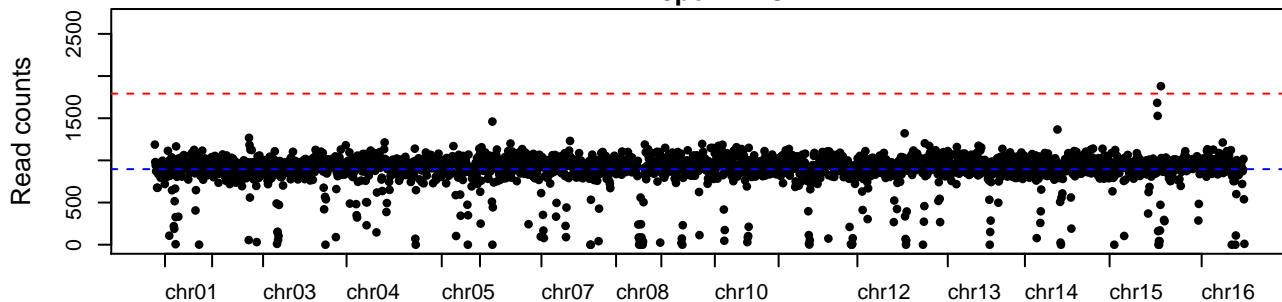**mlh3pch2-7D**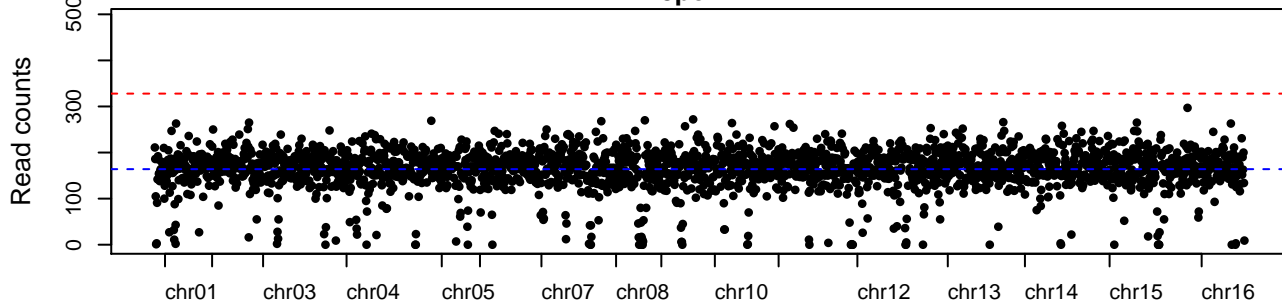

**mlh3pch2-8A**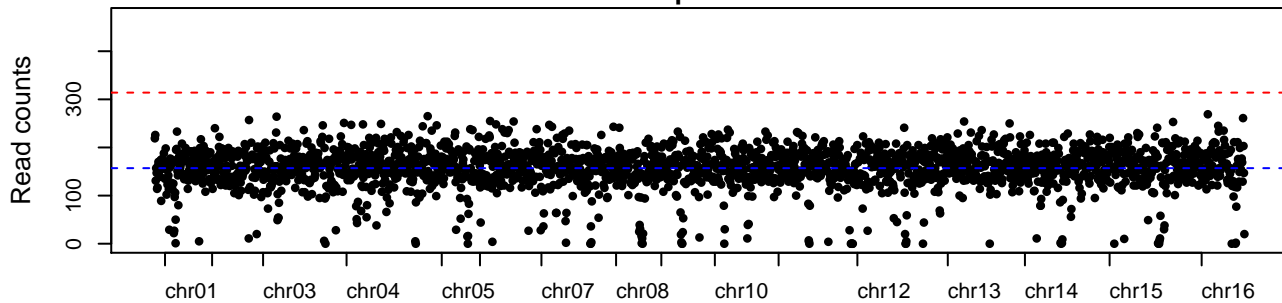**mlh3pch2-8B**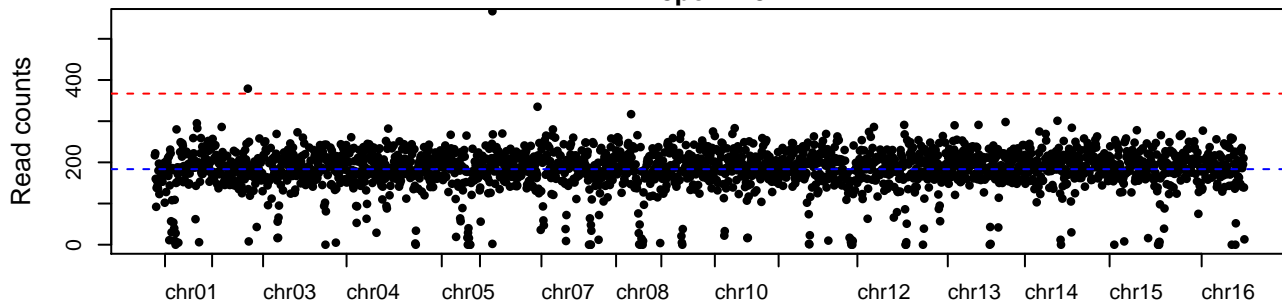**mlh3pch2-8C**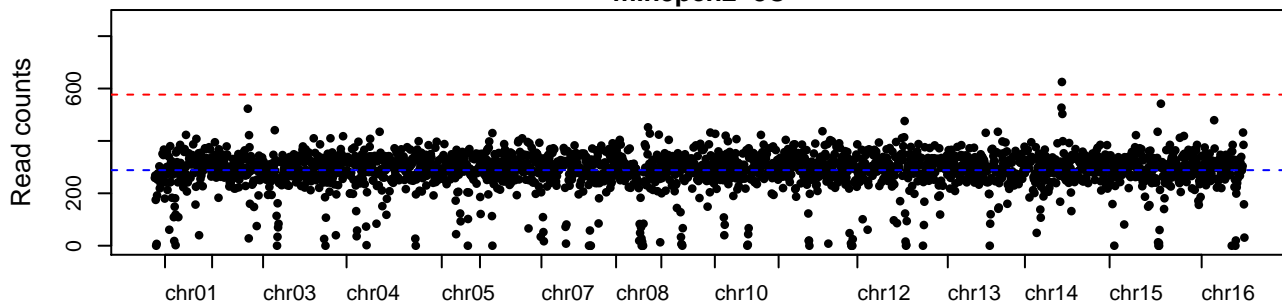**mlh3pch2-8D**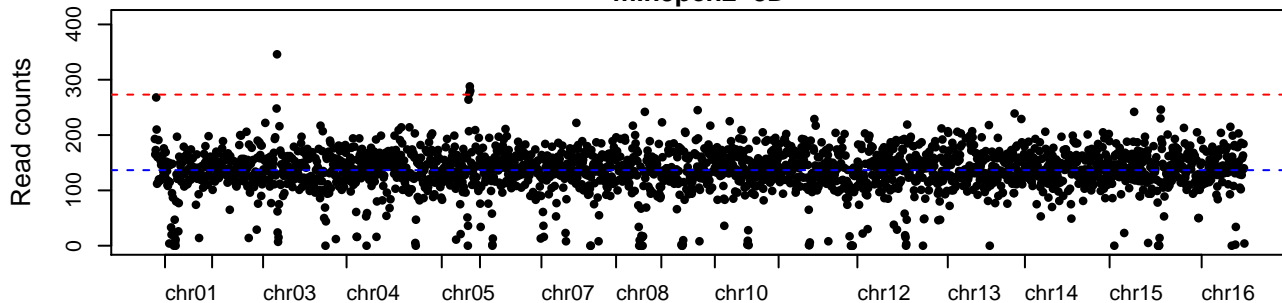

**mlh3pch2-9A**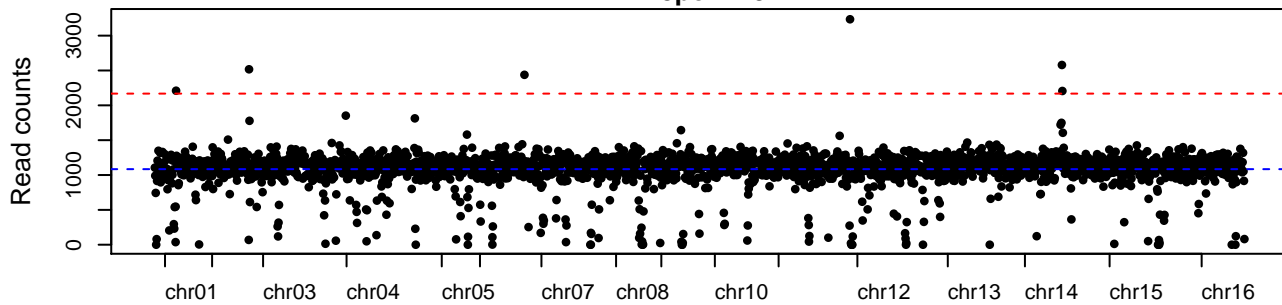**mlh3pch2-9B**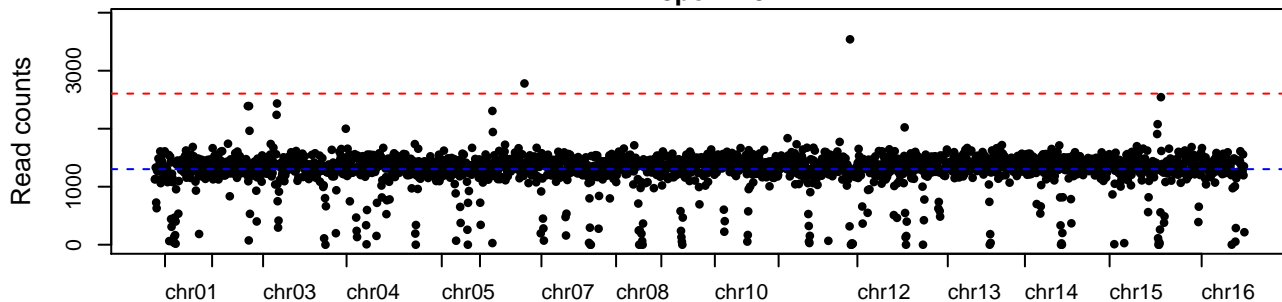**mlh3pch2-9C**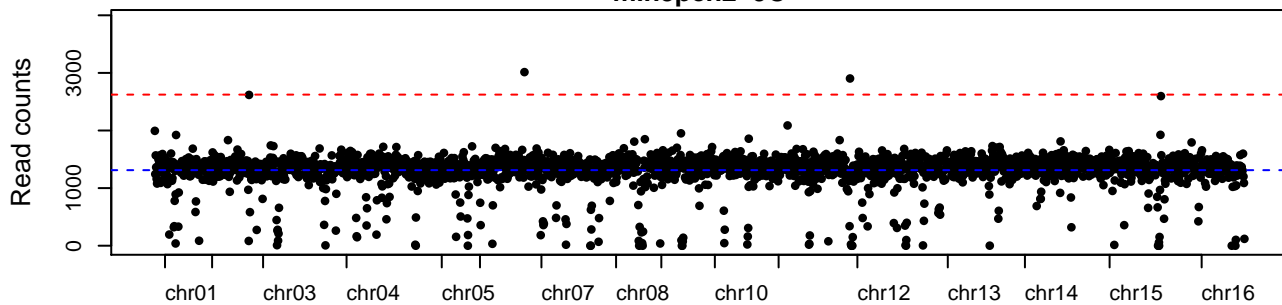**mlh3pch2-9D**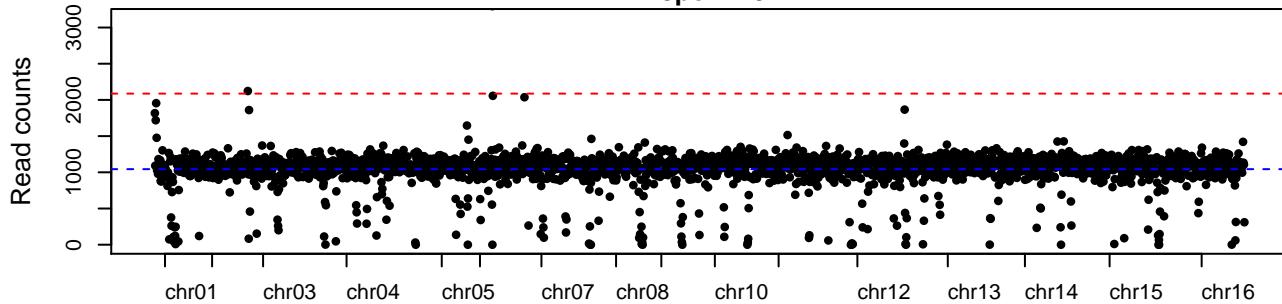

**mlh3pch2-10A**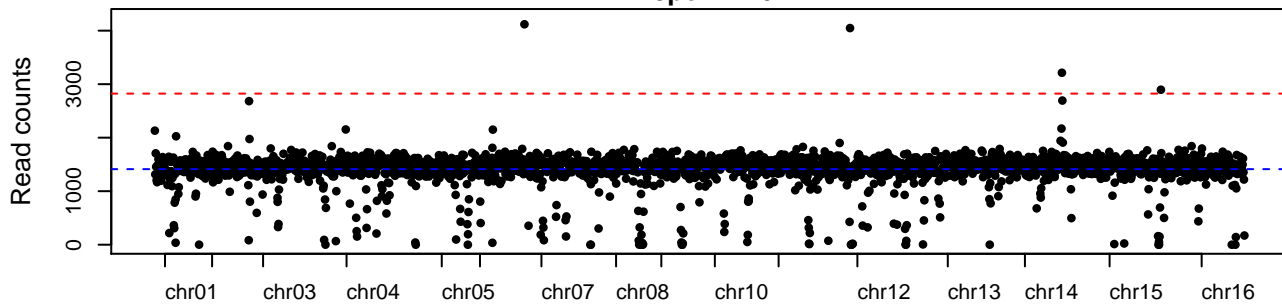**mlh3pch2-10B**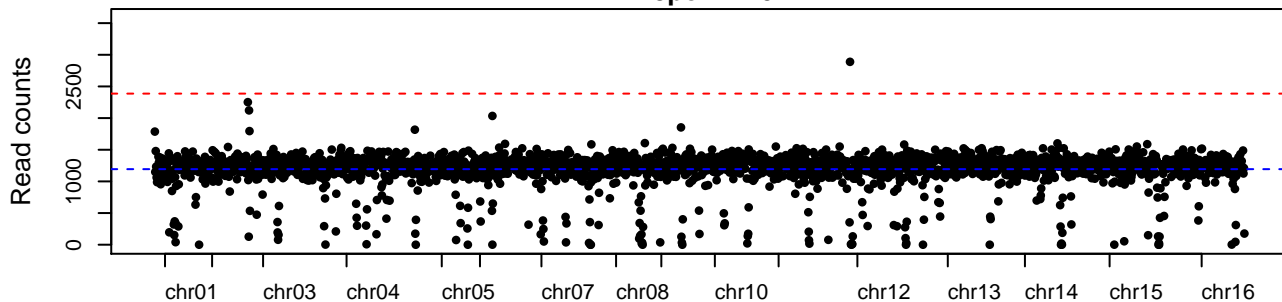**mlh3pch2-10C**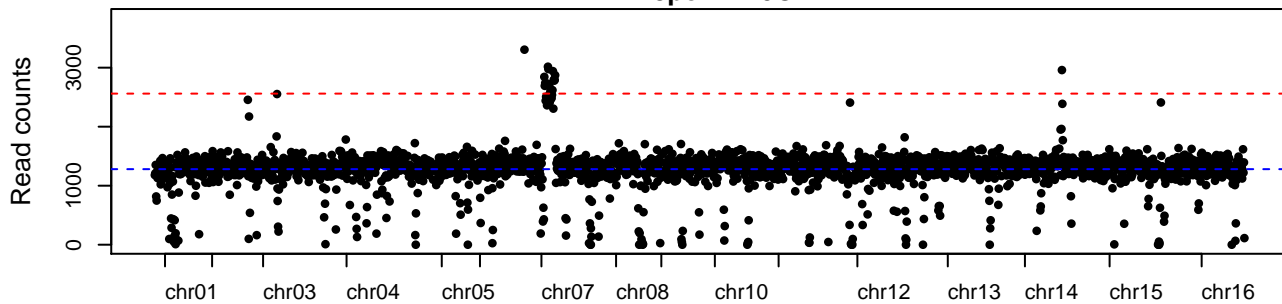**mlh3pch2-10D**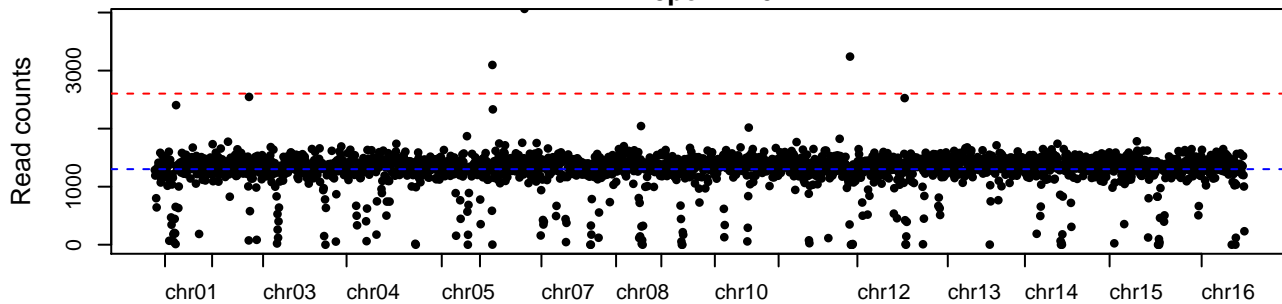

**mlh3pch2-11A**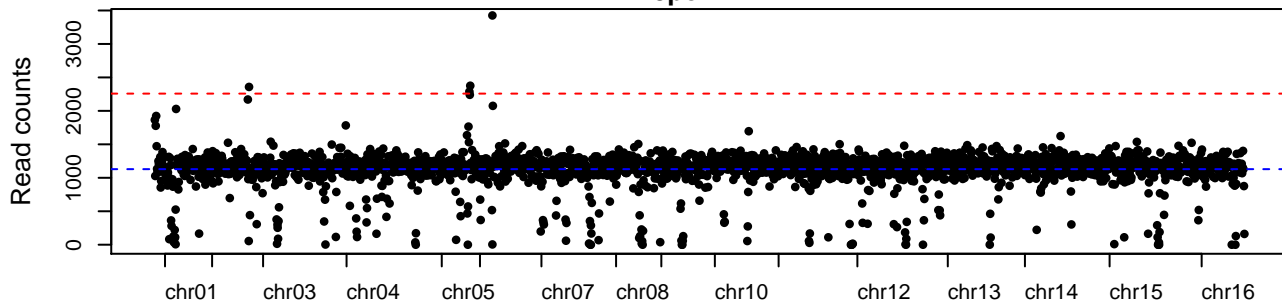**mlh3pch2-11B**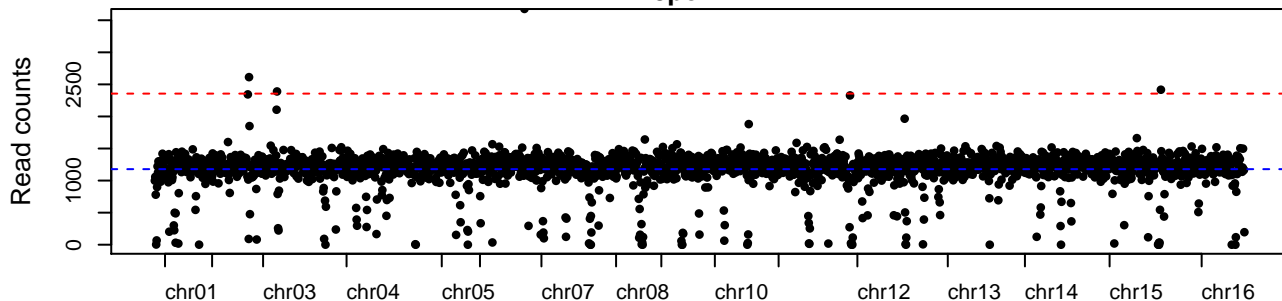**mlh3pch2-11C**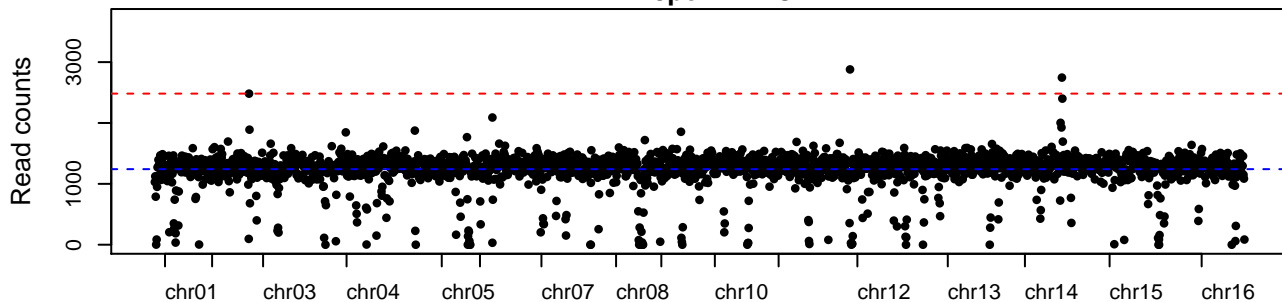**mlh3pch2-11D**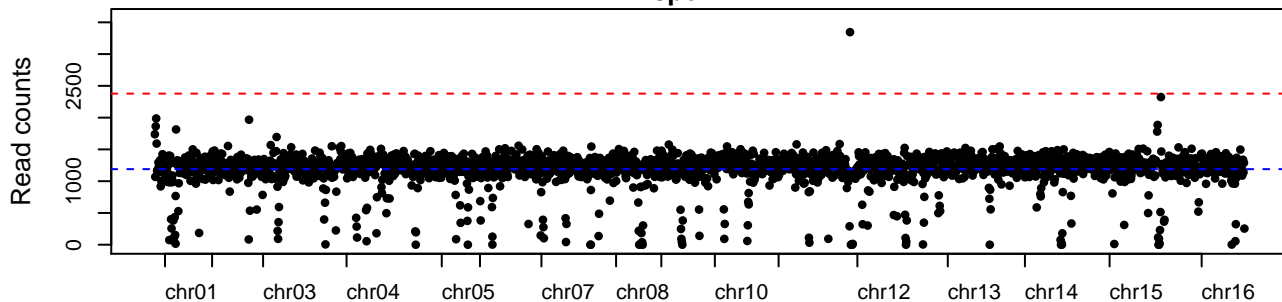

**mlh3pch2-21A**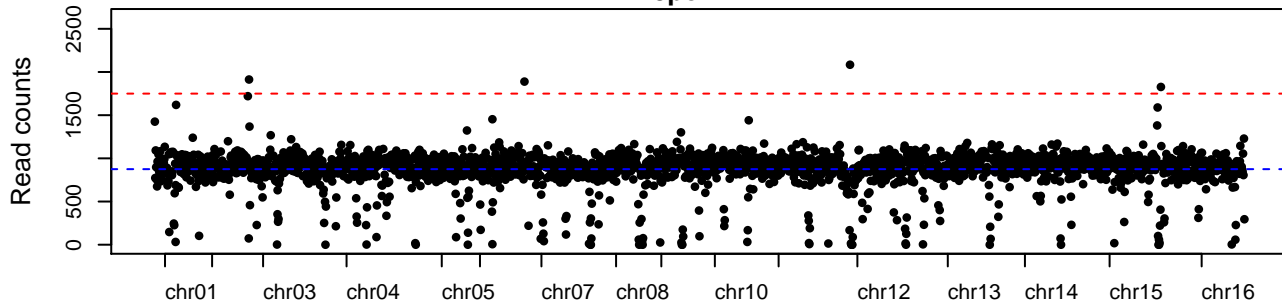**mlh3pch2-21B**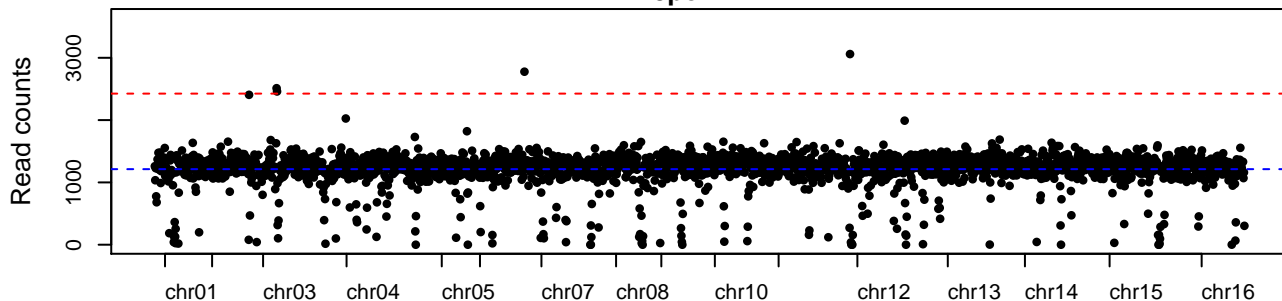**mlh3pch2-21C**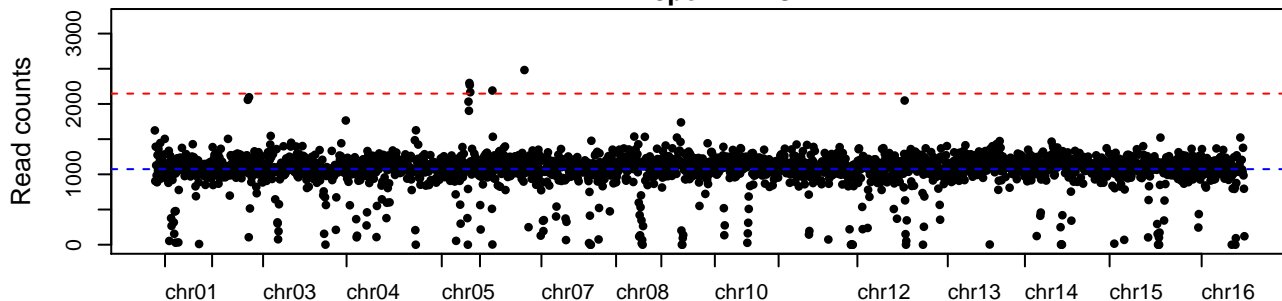**mlh3pch2-21D**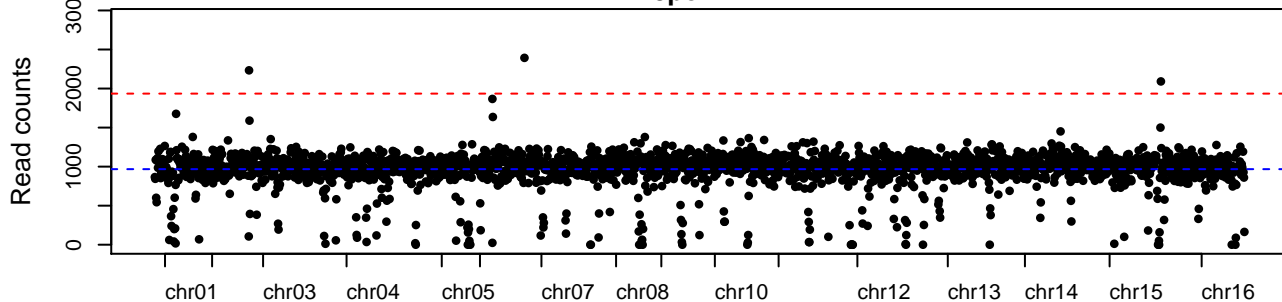

**mlh3pch2-22A**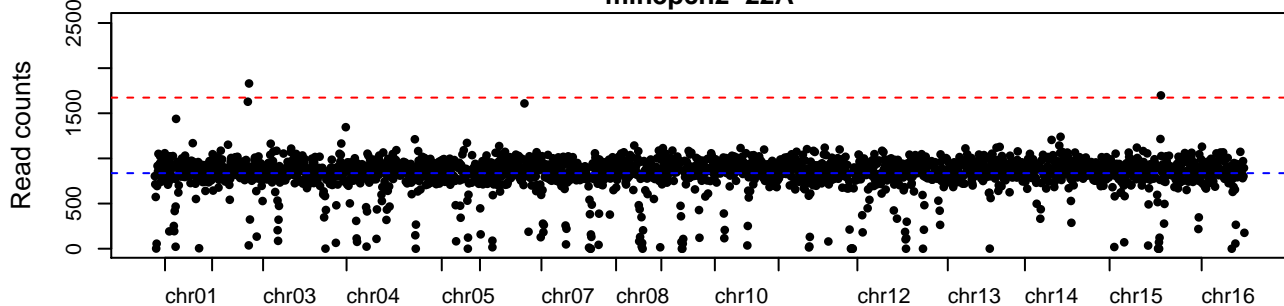**mlh3pch2-22B**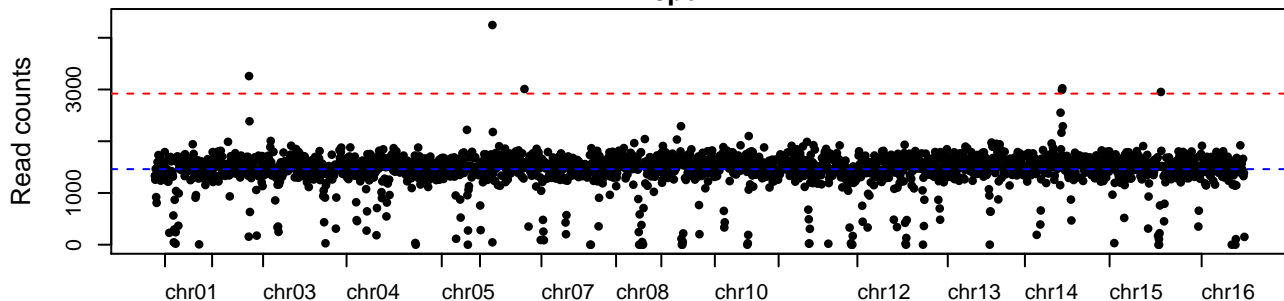**mlh3pch2-22C**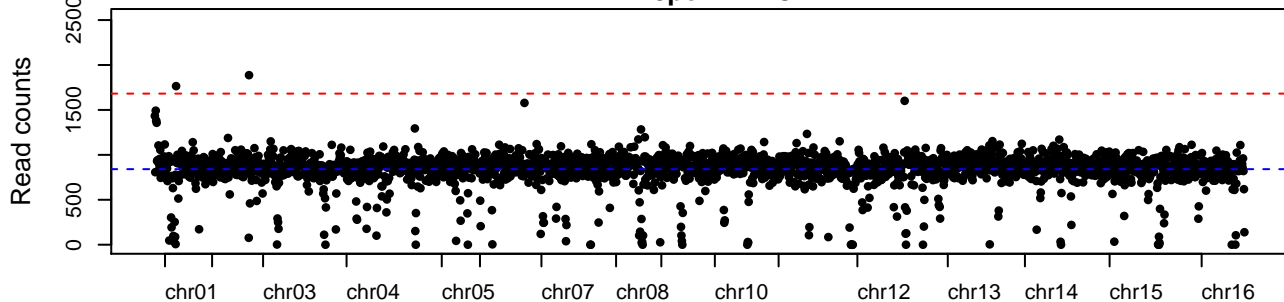**mlh3pch2-22D**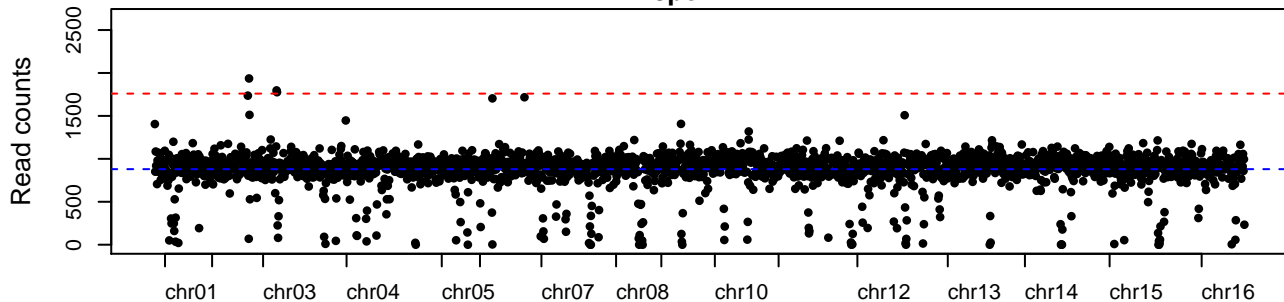

**mlh3pch2-23A**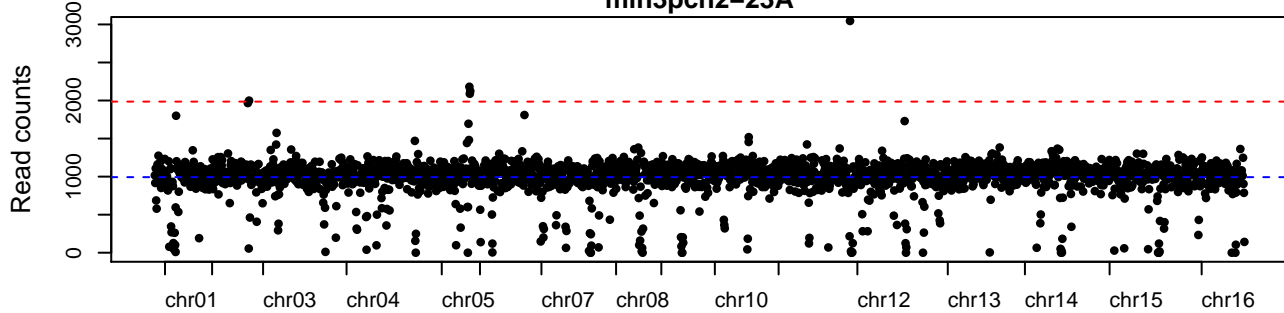**mlh3pch2-23B**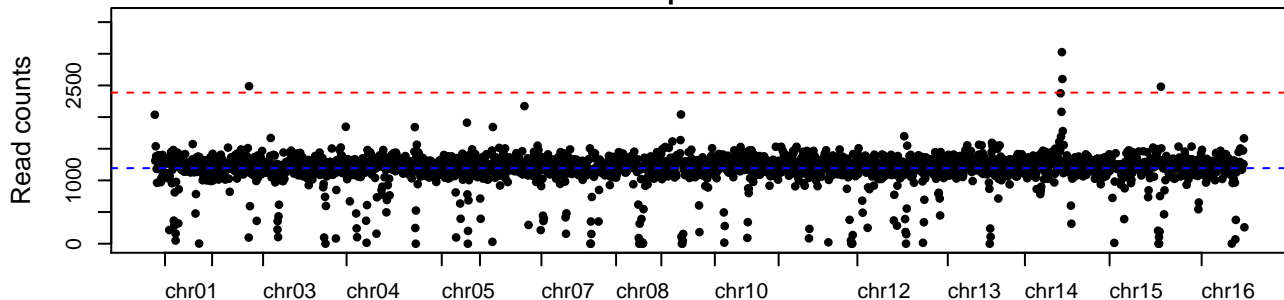**mlh3pch2-23C**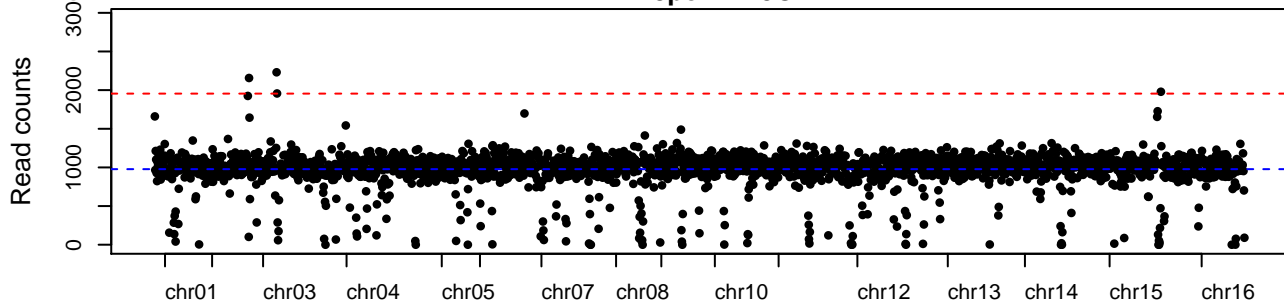**mlh3pch2-23D**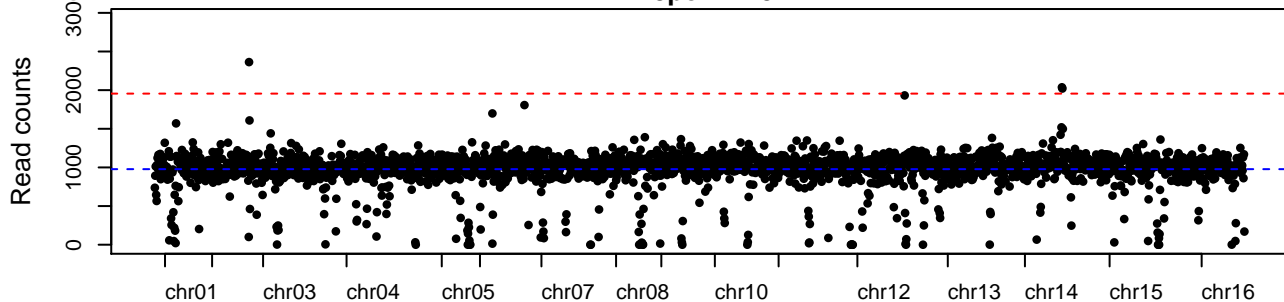



**mlh3pch2-24A**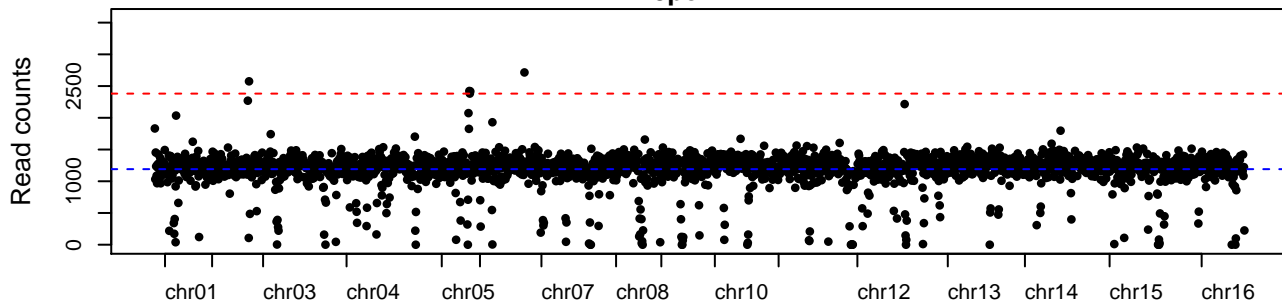**mlh3pch2-24B**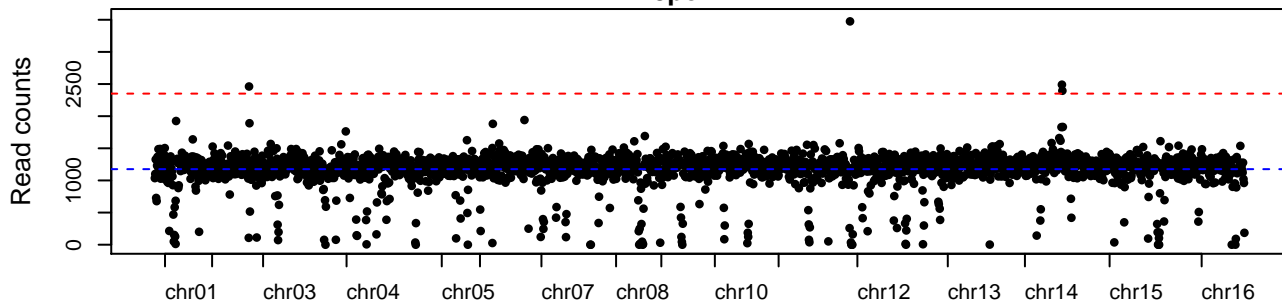**mlh3pch2-24C**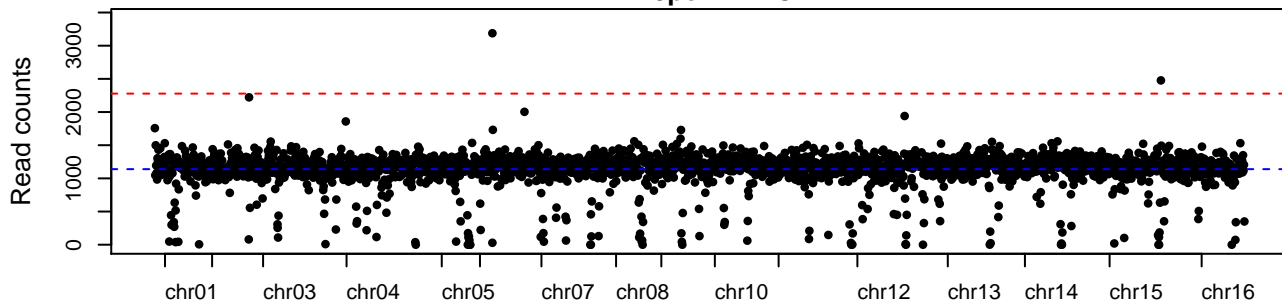**mlh3pch2-24D**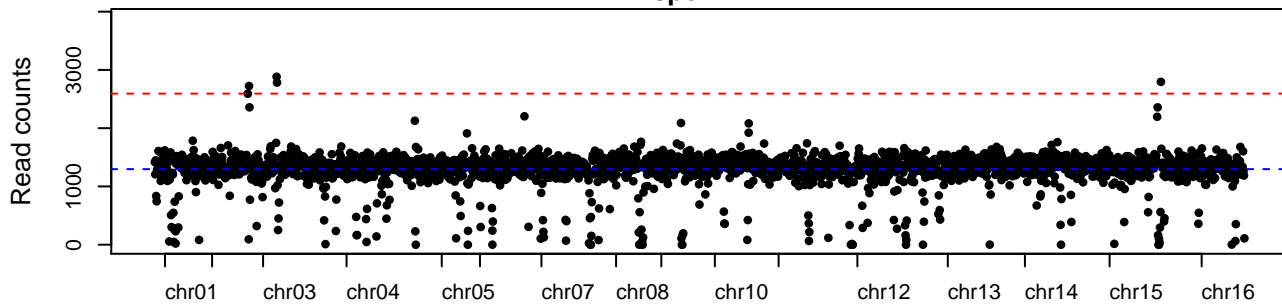

**mlh3pch2-25A**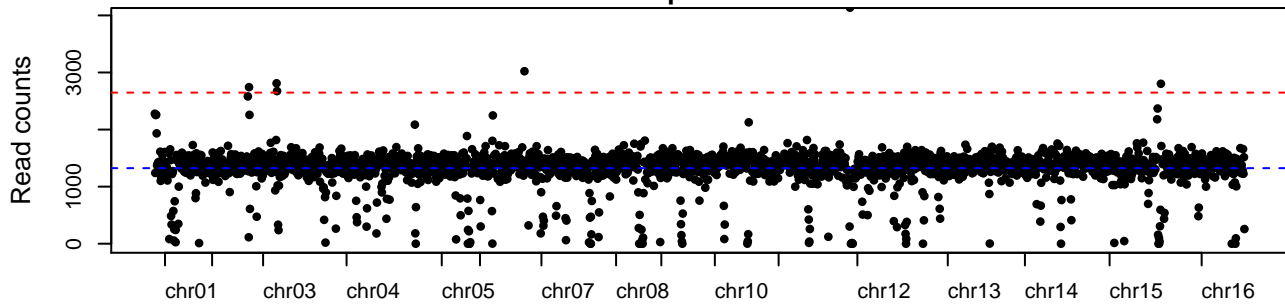**mlh3pch2-25B**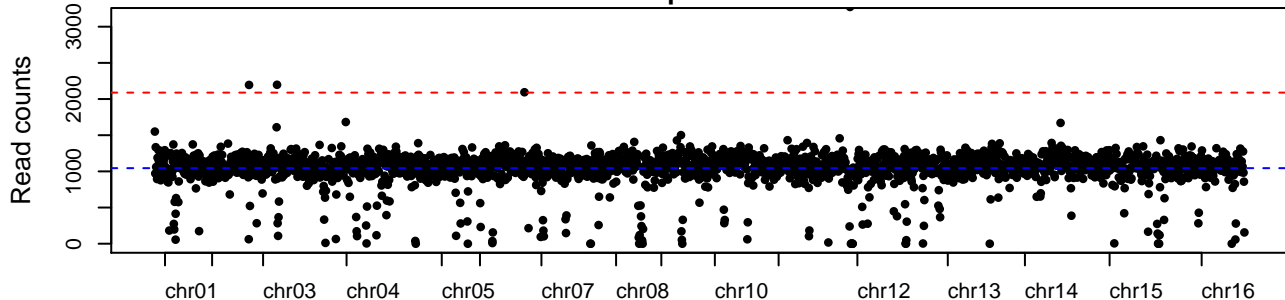**mlh3pch2-25C**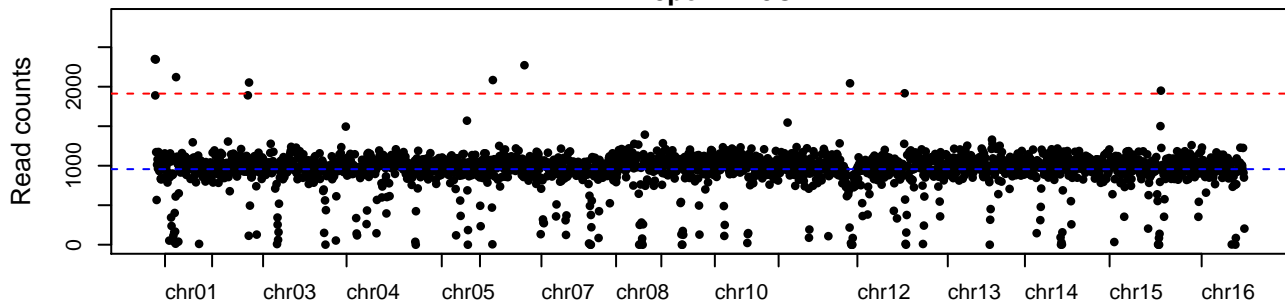**mlh3pch2-25D**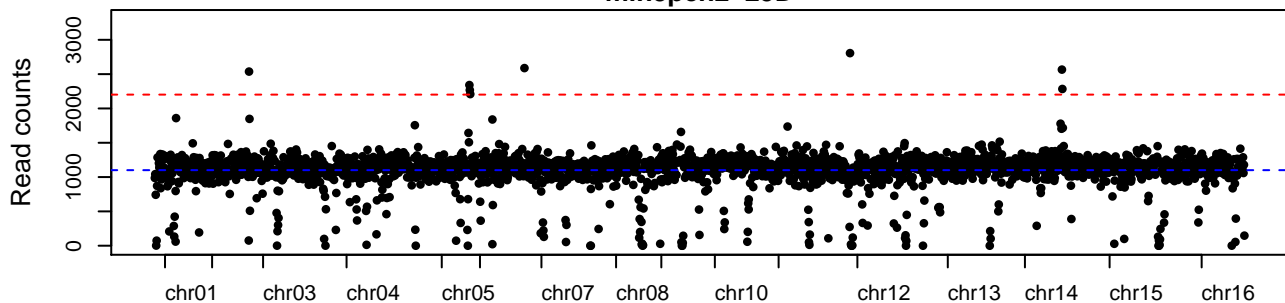

**mlh3pch2-26A**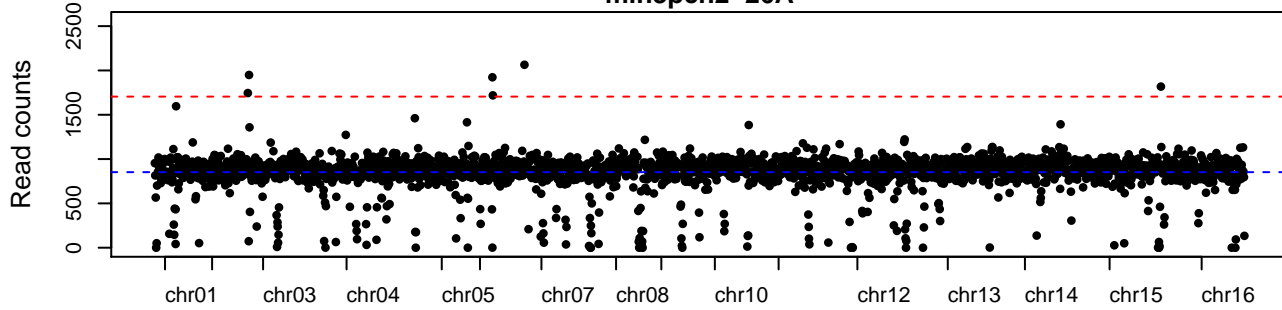**mlh3pch2-26B**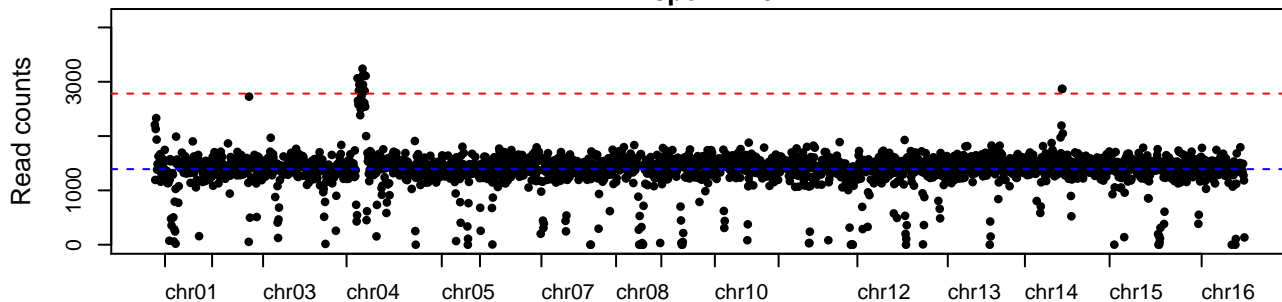**mlh3pch2-26C**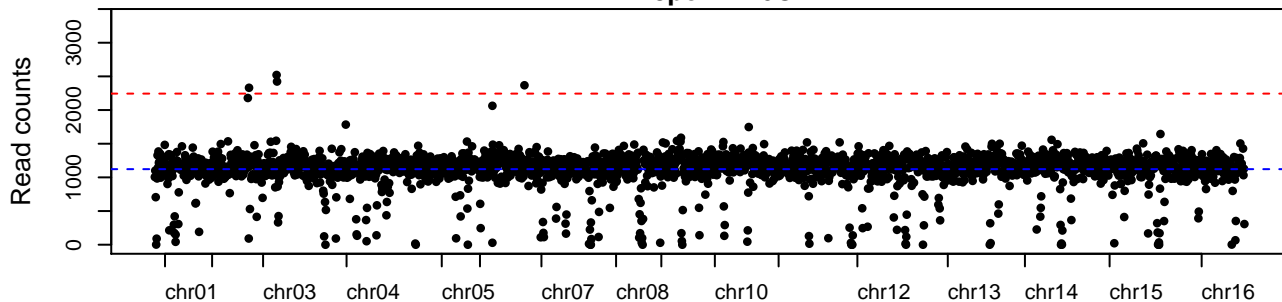**mlh3pch2-26D**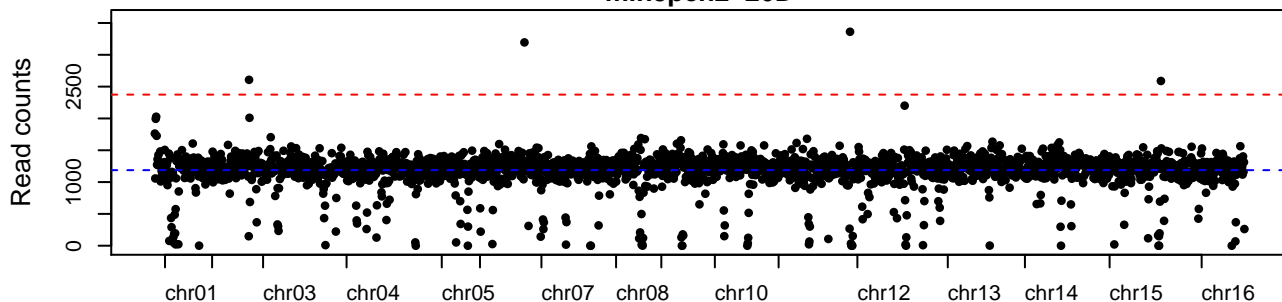

**mlh3pch2-27A**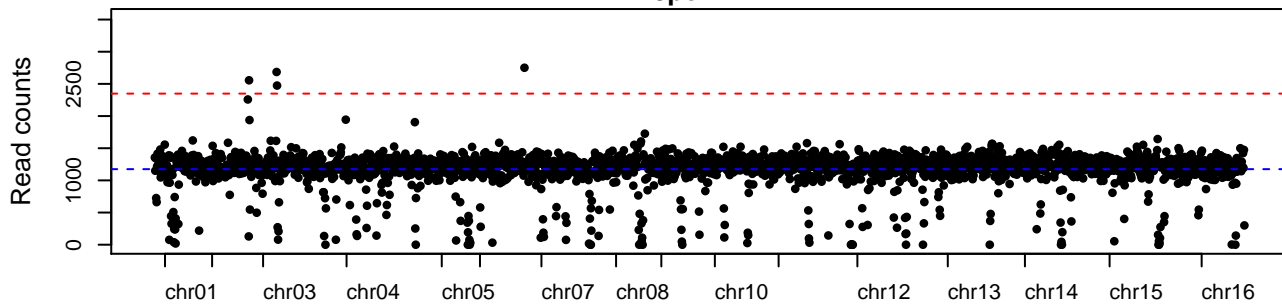**mlh3pch2-27B**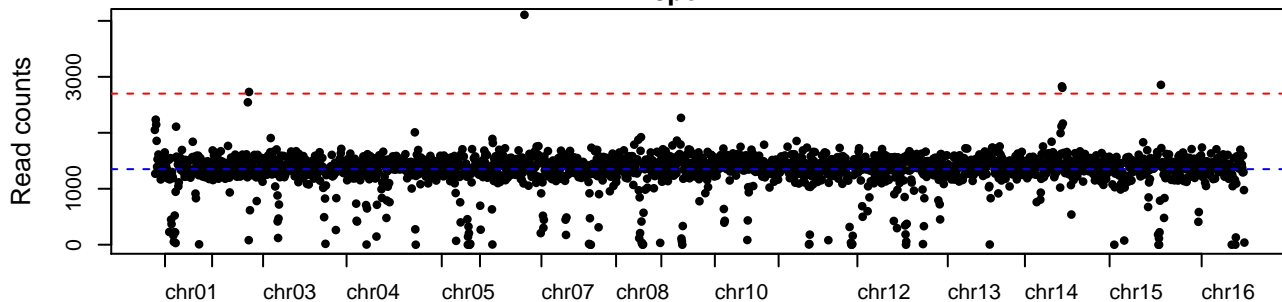**mlh3pch2-27C**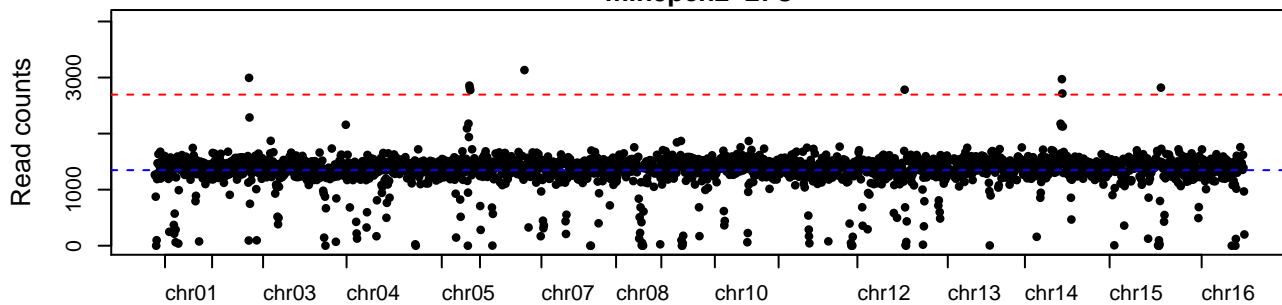**mlh3pch2-27D**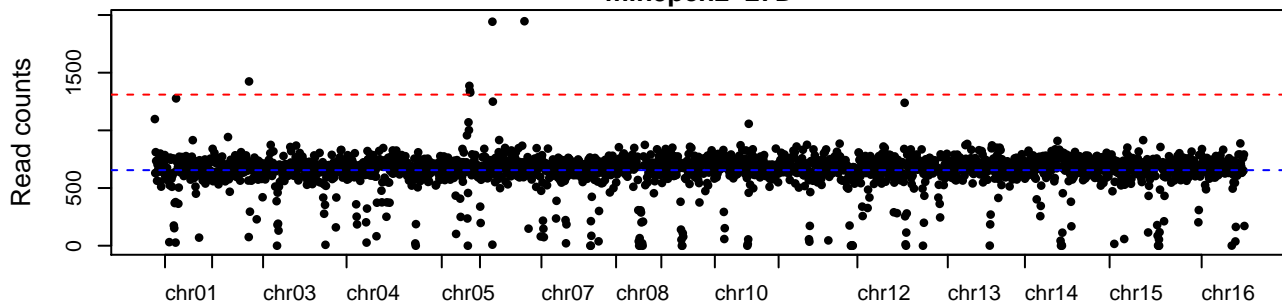

**mlh3pch2-28A**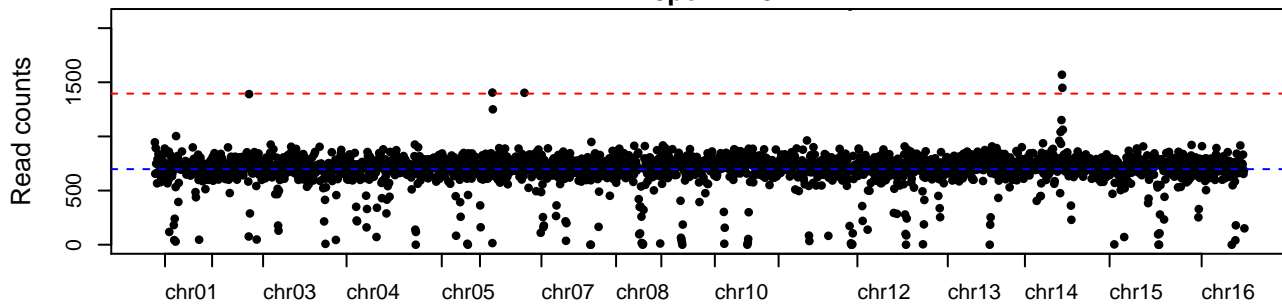**mlh3pch2-28B**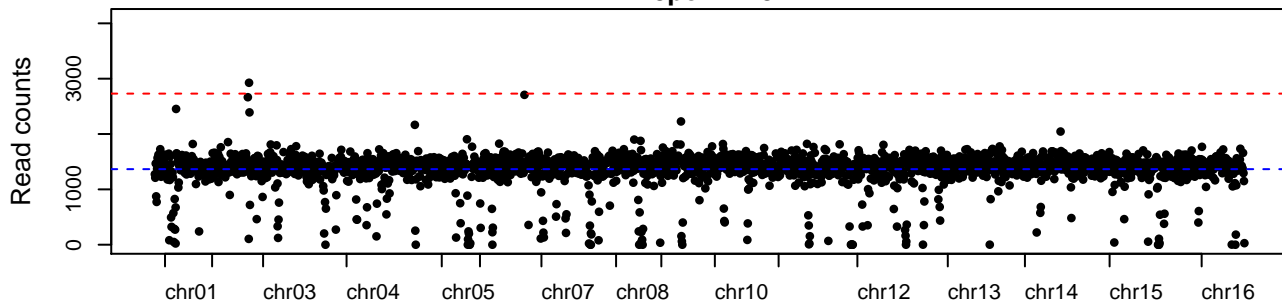**mlh3pch2-28C**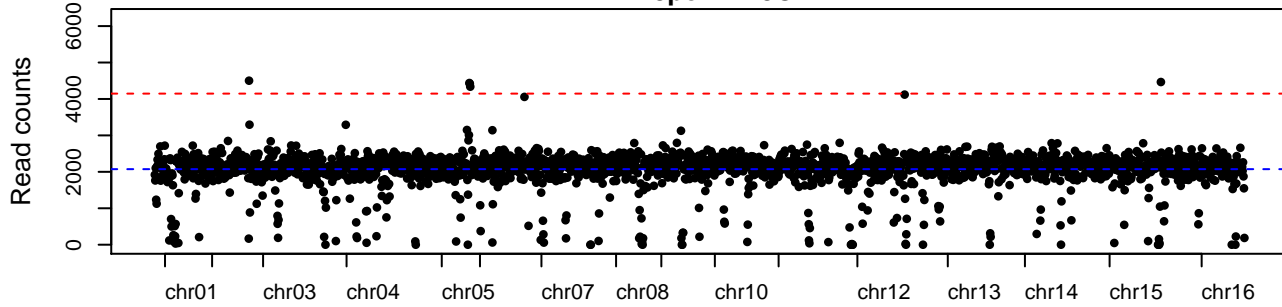**mlh3pch2-28D**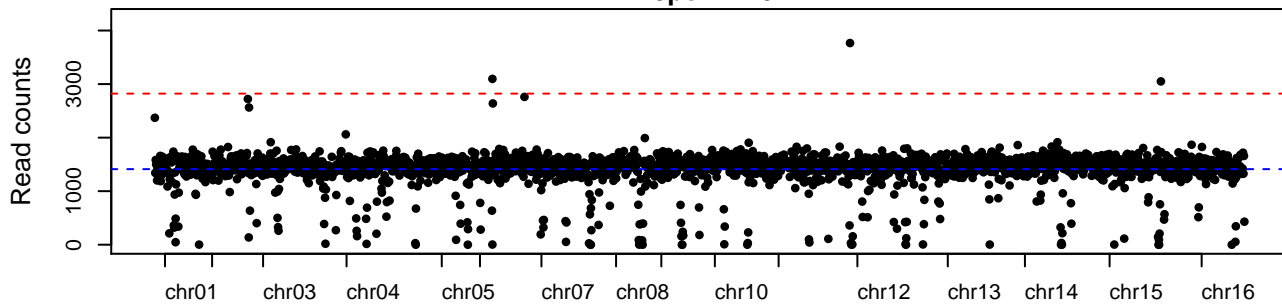

**mlh3pch2-29A**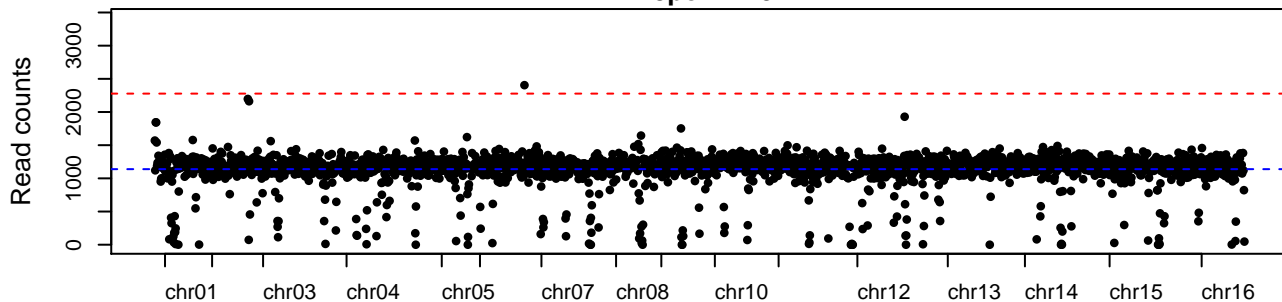**mlh3pch2-29B**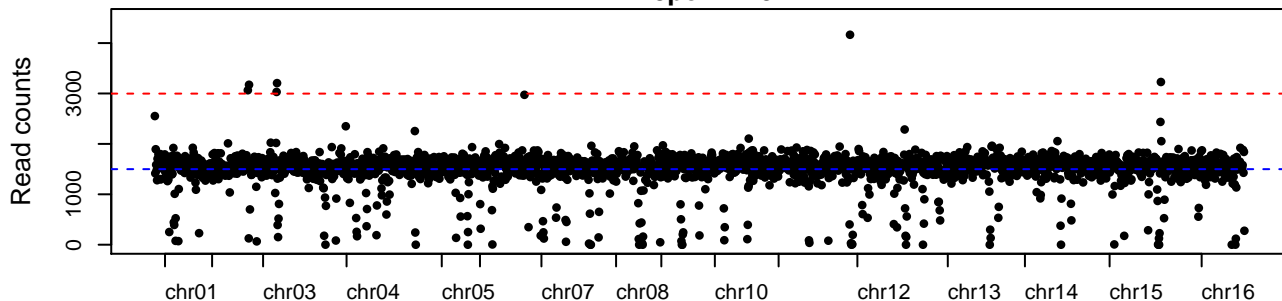**mlh3pch2-29C**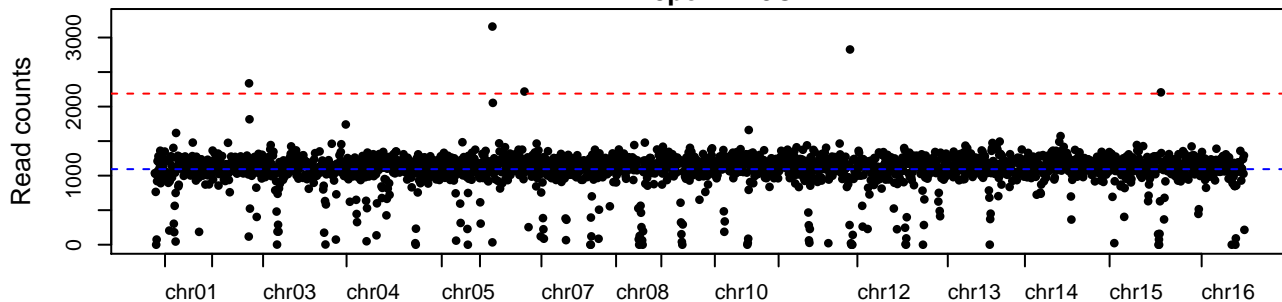**mlh3pch2-29D**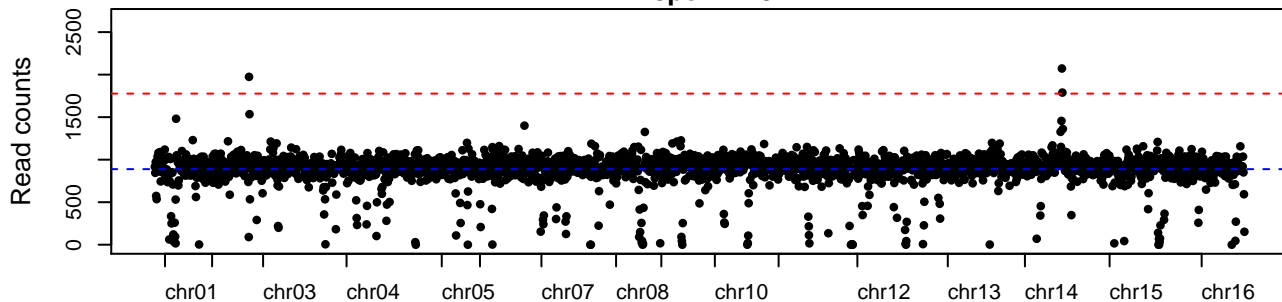

**Figure S9** Genome wide coverage plot to detect aneuploidy in sequenced spores from *mlh3Δ*, *pch2Δ* and *mlh3Δ pch2Δ* tetrads. Each dot indicates the total read count in 5 kb bins. Average read count is shown as dotted blue line. Red line indicates 2X average read count.
